# Supplementary material for: Theoretical study of the mechanism for the sequential N–O and N–N bond cleavage within N2O adducts of N-heterocyclic carbenes by a vanadium(iii) complex
Source: Royal Society of Chemistry journal article supplement (doi:10.1039/c5dt03600c), 2015-12-02
Supplement: c5dt03600c1.pdf [file c5dt03600c1.pdf]

# Theoretical study of the mechanism for the sequential N–O and N–N bond cleavage within N<sub>2</sub>O adducts of N–heterocyclic carbenes by a vanadium(III) complex

Robert Robinson Jr.,<sup>a</sup> Miranda F. Shaw,<sup>a</sup> Robert Stranger,<sup>b</sup> and Brian F. Yates<sup>a,\*</sup>

<sup>a</sup> School of Physical Sciences (Chemistry), University of Tasmania, Private Bag 75, Hobart, TAS 7001, Australia

<sup>b</sup> Research School of Chemistry, Australian National University, Canberra, ACT 0200, Australia

## Supporting Information

| <b>Contents:</b>                                                                                                                                                                        | <b>Page:</b> |
|-----------------------------------------------------------------------------------------------------------------------------------------------------------------------------------------|--------------|
| Full citation for the <b>Gaussian09</b> program package                                                                                                                                 | <b>S3</b>    |
| <b>Fig. S1</b> Energy reaction profiles for N–O cleavage along the triplet-state surface                                                                                                | <b>S4</b>    |
| <b>Table S1</b> Calculated energies and geometric parameters for all stable isomers                                                                                                     | <b>S5</b>    |
| <b>Table S2 &amp; S3</b> Comparison of functionals on the thermal corrections to Gibbs energies                                                                                         | <b>S6</b>    |
| Optimized structures of <b>I<sup>Me</sup>-N<sub>2</sub>O</b> ( <i>normal/inverted</i> ), <b>TSI<sup>Me</sup>-N<sub>2</sub>O</b> & <b>I<sup>Ph</sup>-N<sub>2</sub>O</b> (singlet)        | <b>S7</b>    |
| Optimized structures of <b>1-thf</b> , <b>1</b> , <b>1-thf<sub>P</sub></b> & <b>1<sub>P</sub></b> (triplet)                                                                             | <b>S11</b>   |
| Optimized structures of <b>1-thf</b> , <b>free THF</b> & <b>N<sub>2</sub>O</b> (singlet)                                                                                                | <b>S16</b>   |
| Optimized structures of <b>4-9</b> , <b>11</b> , <b>6-thf</b> , <b>4i</b> , <b>7i</b> , <b>8i</b> , <b>10i</b> , <b>11i</b> , <b>6-thf<sub>P</sub></b> & <b>8<sub>P</sub></b> (triplet) | <b>S18</b>   |
| Optimized structures of <b>TS4-9</b> (triplet)                                                                                                                                          | <b>S36</b>   |
| Optimized structures of <b>TSB6-8</b> (triplet)                                                                                                                                         | <b>S42</b>   |
| Optimized structures of <b>4</b> , <b>6-9</b> , <b>7i-9i</b> , <b>8<sub>P</sub></b> , <b>9<sub>P</sub></b> , <b>8i<sub>P</sub></b> & <b>9i<sub>P</sub></b> (singlet)                    | <b>S45</b>   |

|                                                                                                                                                                  |            |
|------------------------------------------------------------------------------------------------------------------------------------------------------------------|------------|
| Optimized structures of <b>TS8</b> , <i>a</i> <b>TSB8</b> & <i>a</i> <b>TSB9</b> (singlet)                                                                       | <b>S61</b> |
| Optimized structures of <b>TSB8</b> , <b>TSB9i</b> , <b>TSB8<sub>p</sub></b> , <b>TSB9<sub>p</sub></b> & <b>TSB9i<sub>p</sub></b> (singlet)                      | <b>S64</b> |
| Optimized structures of <b>Int</b> , <b>TSInt</b> , <b>2</b> , <b>Int<sub>p</sub></b> , <b>TSInt<sub>p</sub></b> & <b>2<sub>p</sub></b> (singlet, Solvent = THF) | <b>S72</b> |
| Optimized structures of <b>2</b> , <b>TSB2</b> , <b>3</b> , <b>2<sub>p</sub></b> , <b>TSB2<sub>p</sub></b> & <b>3<sub>p</sub></b> (singlet, Solvent = toluene)   | <b>S81</b> |
| Optimized structures of <b>TS7c</b> <b>TS8c</b> & <b>TS11c</b> (triplet)                                                                                         | <b>S90</b> |
| Optimized structures of <b>TS8c</b> & <b>TS9c</b> (singlet)                                                                                                      | <b>S93</b> |
| Minimum Energy Crossing Points (MECPs) at <b>8M</b> , <b>9M</b> & <b>8M<sub>p</sub></b>                                                                          | <b>S95</b> |

## Full citation for the Gaussian09 program

**Gaussian09**, revision D.01, Frisch, M. J.; Trucks, G. W.; Schlegel, H. B.; Scuseria, G. E.; Robb, M. A.; Cheeseman, J. R.; Scalmani, G.; Barone, V.; Mennucci, B.; Petersson, G. A.; Nakatsuji, H.; Caricato, M.; Li, X.; Hratchian, H. P.; Izmaylov, A. F.; Bloino, J.; Zheng, G.; Sonnenberg, J. L.; Hada, M.; Ehara, M.; Toyota, K.; Fukuda, R.; Hasegawa, J.; Ishida, M.; Nakajima, T.; Honda, Y.; Kitao, O.; Nakai, H.; Vreven, T.; Montgomery, Jr., J. A.; Peralta, J. E.; Ogliaro, F.; Bearpark, M.; Heyd, J. J.; Brothers, E.; Kudin, K. N.; Staroverov, V. N.; Kobayashi, R.; Normand, J.; Raghavachari, K.; Rendell, A.; Burant, J. C.; Iyengar, S. S.; Tomasi, J.; Cossi, M.; Rega, N.; Millam, J. M.; Klene, M.; Knox, J. E.; Cross, J. B.; Bakken, V.; Adamo, C.; Jaramillo, J.; Gomperts, R.; Stratmann, R. E.; Yazyev, O.; Austin, A. J.; Cammi, R.; Pomelli, C.; Ochterski, J. W.; Martin, R. L.; Morokuma, K.; Zakrzewski, V. G.; Voth, G. A.; Salvador, P.; Dannenberg, J. J.; Dapprich, S.; Daniels, A. D.; Farkas, Ö.; Foresman, J. B.; Ortiz, J. V.; Cioslowski, J.; Fox, D. J. *Gaussian, Inc.*, Wallingford, CT **2009**.

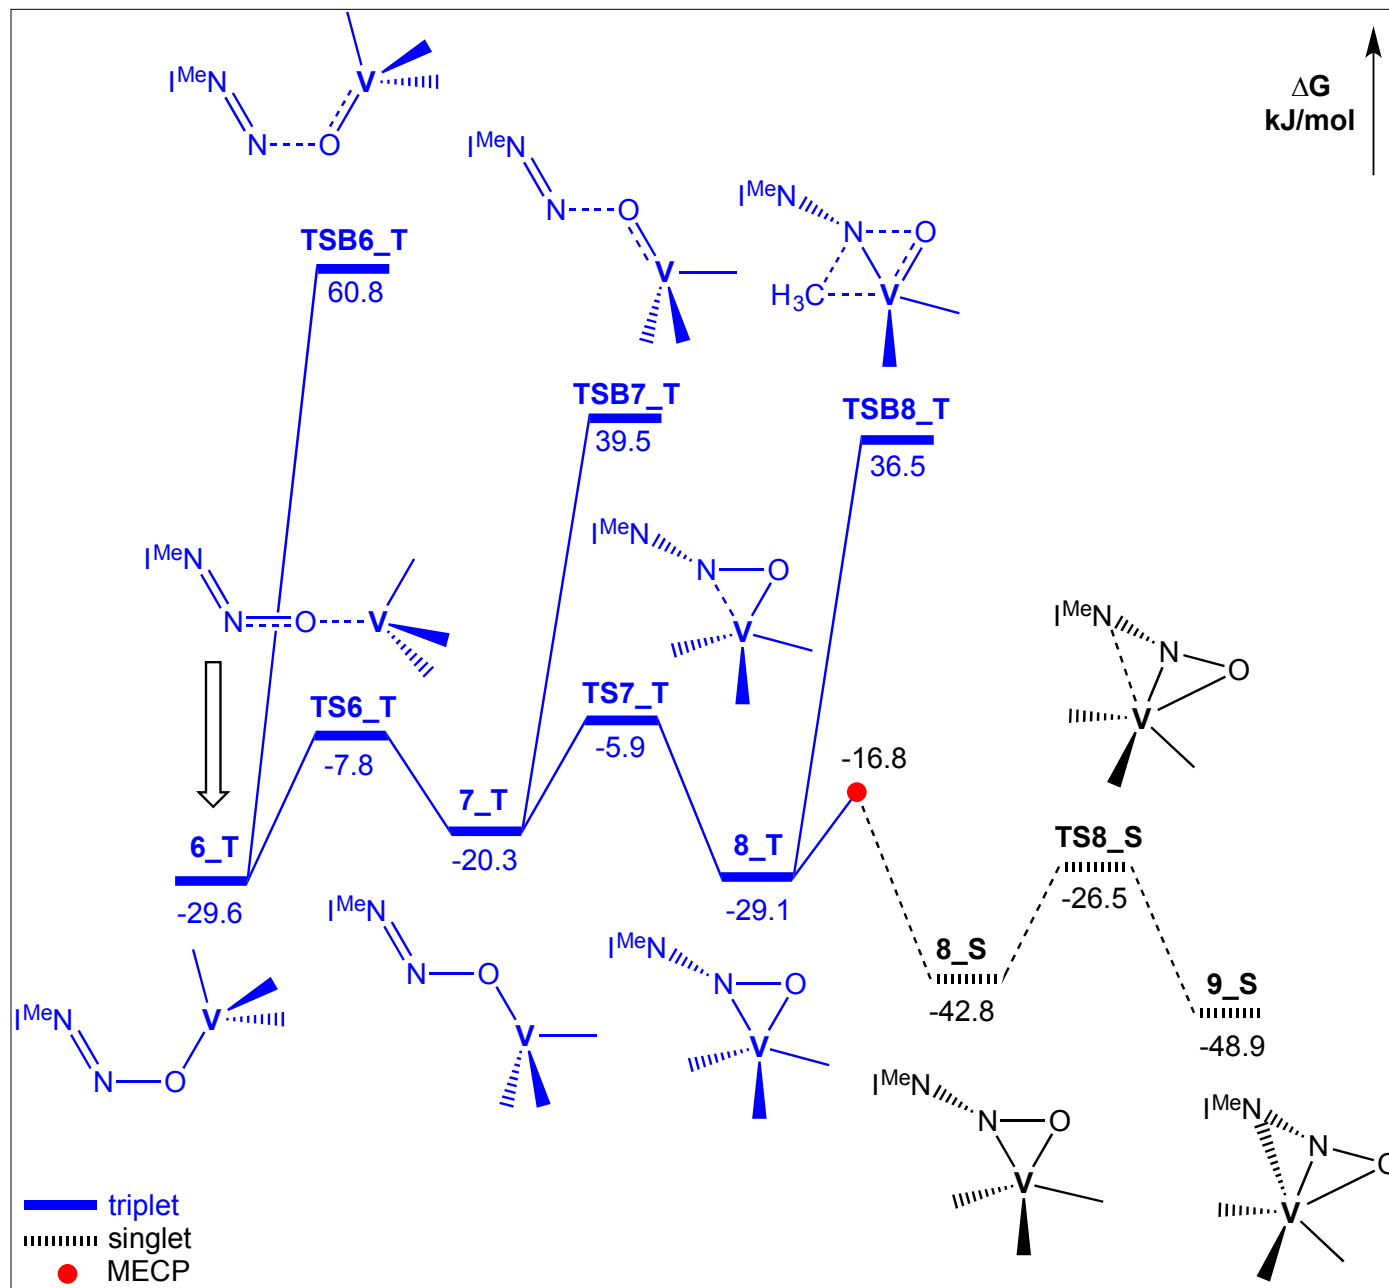

**Fig. S1.** Calculated reaction profile for N–O bond cleavage from 6\_T–8\_T. All energies are relative to 1\_T–thf and *normal* I<sup>Me</sup>–N<sub>2</sub>O in THF.

**Table S1.** Calculated energies (kJ/mol) and selected bond lengths (Å) for all stable I<sup>Me</sup>-N<sub>2</sub>O-V(CH<sub>3</sub>)<sub>3</sub> complexes<sup>a,b</sup>

| <i>Triplet-state</i> |                   |            |       |       |       |                | <i>Singlet-state</i> |                   |            |       |       |       |                |
|----------------------|-------------------|------------|-------|-------|-------|----------------|----------------------|-------------------|------------|-------|-------|-------|----------------|
| <i>Normal</i>        | $\eta$            | $\Delta G$ | N2-O  | N1-N2 | V-O   | V-N            | <i>Normal</i>        | $\eta$            | $\Delta G$ | N2-O  | N1-N2 | V-O   | V-N            |
| <b>4_T</b>           | N1                | -20.9      | 1.227 | 1.348 | -     | 2.057          | <b>4_S</b>           | N1                | 99.4       | 1.219 | 1.367 | -     | 1.962          |
| <b>5_T</b>           | N1,O              | -22.3      | 1.337 | 1.343 | 1.890 | 2.253          |                      |                   |            |       |       |       |                |
| <b>6_T</b>           | O <sub>syn</sub>  | -29.6      | 1.324 | 1.327 | 1.830 | -              | <b>6_S</b>           | O <sub>syn</sub>  | 51.8       | 1.298 | 1.347 | 1.768 | -              |
| <b>7_T</b>           | O <sub>anti</sub> | -20.3      | 1.340 | 1.315 | 1.815 | -              | <b>7_S</b>           | O <sub>anti</sub> | 50.6       | 1.298 | 1.346 | 1.724 | -              |
| <b>8_T</b>           | N2,O              | -29.1      | 1.343 | 1.321 | 1.899 | 2.025          | <b>8_S</b>           | N2,O              | -42.8      | 1.395 | 1.375 | 1.775 | 1.909          |
| <b>9_T</b>           | N1,N2,O           | -11.5      | 1.357 | 1.337 | 1.858 | 2.026<br>1.888 | <b>9_S</b>           | N1,N2,O           | -48.9      | 1.377 | 1.423 | 1.858 | 2.026<br>1.888 |
| <b>11_T</b>          | N2                | -11.3      | 1.226 | 1.345 | -     | 2.056          |                      |                   |            |       |       |       |                |
| <i>Inverted</i>      |                   |            |       |       |       |                | <i>Inverted</i>      |                   |            |       |       |       |                |
| <b>4i_T</b>          | N1                | -11.2      | 1.227 | 1.345 | -     | 2.055          |                      |                   |            |       |       |       |                |
| <b>7i_T</b>          | O <sub>anti</sub> | -1.7       | 1.342 | 1.309 | 1.833 | -              | <b>7i_S</b>          | O <sub>anti</sub> | 87.5       | 1.321 | 1.337 | 1.751 | -              |
| <b>8i_T</b>          | N2,O              | -17.5      | 1.357 | 1.319 | 1.911 | 2.001          | <b>8i_S</b>          | N2,O              | -29.4      | 1.442 | 1.382 | 1.761 | 1.894          |
|                      |                   |            |       |       |       |                | <b>9i_S</b>          | N1,N2,O           | -43.8      | 1.409 | 1.418 | 1.837 | 1.985<br>1.895 |
| <b>10i_T</b>         | N1,N2             | 9.6        | 1.248 | 1.407 | -     | 1.989<br>2.032 |                      |                   |            |       |       |       |                |
| <b>11i_T</b>         | N2                | -15.7      | 1.257 | 1.323 | -     | 1.950          |                      |                   |            |       |       |       |                |

<sup>a</sup>All  $\Delta G$  energies are relative to **1\_T-thf** and *normal* **I<sup>Me</sup>-N<sub>2</sub>O** in THF.

<sup>b</sup>Attempts to locate **9i\_T** led to formation of **8i\_T**. Complex **10\_T** led to **9\_T**. Both **5\_S** and **11\_S** led to **8\_S**. Complex **11i\_S** to **8i\_S**. Complexes **10\_S**, **4i\_S** and **10i\_S** to the unobserved N-N insertion product, (I<sup>Me</sup>-N)V(CH<sub>3</sub>)<sub>3</sub>(NO).

As discussed in the computational details section, the calculated energy values throughout the article were obtained at the M06/BS2//M06/BS1 level of theory in THF solvation. As such, the methodology of the calculated Gibbs energies for the formation of  $\text{O}=\text{V}(\text{Me})_2(\text{I}^{\text{Me}}\text{N}_2\text{Me})$  (**2\_S**) were carried out on the corresponding stationary points (**1\_T-thf**,  $\text{I}^{\text{Me}}\text{-N}_2\text{O}$ , **2\_S** and thf) at different levels of theory and the results are shown below in Table S1.

**Table S2.** Effect of DFT functional method on the calculated Gibbs energy values

| Level of theory            |                | $\Delta\text{G}$ (kJ/mol)                              |
|----------------------------|----------------|--------------------------------------------------------|
| $\text{G}_{\text{corr}}^a$ | $\text{SPE}^b$ | <b>1_T-thf+I<sup>Me</sup>-N<sub>2</sub>O → 2_S+thf</b> |
| M06                        | B3LYP          | -213.9                                                 |
| M06                        | M06            | -308.1                                                 |
| B3LYP                      | B3LYP          | -219.9                                                 |
| B3LYP                      | M06            | -320.7                                                 |

<sup>a</sup>All energies calculated with BS1 (SDD for Mo; 6-31G(d) for all other elements).

<sup>b</sup>All energies calculated with BS2 (def2-QZVP for Mo; 6-311+G(2d,p) for all other elements).

Similarly, calculations were carried out on the corresponding stationary points with Ph substituents/ligands (**1\_T<sub>P</sub>-thf**,  $\text{I}^{\text{Ph}}\text{-N}_2\text{O}$ , **2\_S<sub>P</sub>**) at different levels of theory and the results are shown below in Table S2.

**Table S3.** Effect of DFT functional method on the calculated Gibbs energy values

| Level of theory            |                | $\Delta\text{G}$ (kJ/mol)                                                       |
|----------------------------|----------------|---------------------------------------------------------------------------------|
| $\text{G}_{\text{corr}}^a$ | $\text{SPE}^b$ | <b>1_T<sub>P</sub>-thf+ I<sup>Ph</sup>-N<sub>2</sub>O → 2_S<sub>P</sub>+thf</b> |
| M06                        | M06            | -357.5                                                                          |
| B3LYP                      | B3LYP          | -231.4                                                                          |
| B3LYP-D3BJ                 | M06            | -363.4                                                                          |
| B3LYP-D3BJ                 | B3LYP-D3BJ     | -294.5                                                                          |

<sup>a</sup>All energies calculated with BS1 (SDD for Mo; 6-31G(d) for all other elements).

<sup>b</sup>All energies calculated with BS2 (def2-QZVP for Mo; 6-311+G(2d,p) for all other elements).

**Cartesian coordinates, electronic energies ( $E_{\text{elec}}$ ), thermal corrections to enthalpies ( $H_{\text{corr}}$ ) and Gibbs ( $G_{\text{corr}}$ ) energies and single-point energies (SPE) for  $\text{I}^{\text{Me}}\text{-N}_2\text{O}$  (*normal/inverted*),  $\text{TSI}^{\text{Me}}\text{-N}_2\text{O}$  and  $\text{I}^{\text{Ph}}\text{-N}_2\text{O}$  (singlet) in Solvent = THF**

**$\text{I}^{\text{Me}}\text{-N}_2\text{O}$  (*normal*)**

$E_{\text{elec}}$  (M06/BS1) = -489.47945068 au

$H_{\text{corr}}$  (M06/BS1) = 0.152303 au

$G_{\text{corr}}$  (M06/BS1) = 0.405391 au

SPE (M06/BS2//M06/BS1) = -489.31808050 au

0 1

|   |            |            |            |
|---|------------|------------|------------|
| O | 4.11474600 | 6.35269700 | 1.42644000 |
| N | 7.05135500 | 4.35916700 | 3.35175800 |
| N | 6.02499500 | 2.53217700 | 2.75157400 |
| N | 4.92211400 | 4.47156500 | 2.06366300 |
| N | 5.06637200 | 5.80100400 | 1.97831700 |
| C | 5.95780800 | 3.88672800 | 2.68828800 |
| C | 7.79311400 | 3.28109400 | 3.81949200 |
| H | 8.70835000 | 3.43353000 | 4.37430200 |
| C | 7.15710900 | 2.15053400 | 3.44860700 |
| H | 7.39665400 | 1.10964800 | 3.61344400 |
| C | 7.41867900 | 5.74665800 | 3.59173500 |
| H | 7.64229700 | 6.25822800 | 2.65267200 |
| H | 8.30334900 | 5.74804000 | 4.23477600 |
| H | 6.60293200 | 6.27671400 | 4.08979900 |
| C | 5.03831900 | 1.65037800 | 2.15752500 |
| H | 4.04885100 | 1.85317800 | 2.57780800 |
| H | 5.32463100 | 0.61892400 | 2.37578200 |
| H | 4.99852700 | 1.79943800 | 1.07431800 |



## TSI<sup>Me</sup>-N<sub>2</sub>O

$E_{\text{elec}}$  (M06/BS1) = -486.15652588 au

$H_{\text{corr}}$  (M06/BS1) = 0.150396 au

$G_{\text{corr}}$  (M06/BS1) = 0.105228 au

SPE (M06/BS2//M06/BS1) = -489.29184585 au

0 1

|   |             |             |             |
|---|-------------|-------------|-------------|
| C | 2.18750900  | 0.60903500  | -0.14738000 |
| C | 1.34064900  | 1.65293200  | -0.10412700 |
| C | 0.10549500  | -0.22317400 | 0.10438200  |
| N | 1.42982300  | -0.55140200 | -0.01969800 |
| H | 3.26220500  | 0.56801500  | -0.25537500 |
| H | 1.51773100  | 2.71737800  | -0.16790300 |
| N | 0.04613600  | 1.14838900  | 0.05429300  |
| C | 1.90053000  | -1.91538300 | -0.00708100 |
| H | 1.70312500  | -2.38621700 | 0.96352400  |
| H | 1.39493900  | -2.49768600 | -0.78627700 |
| H | 2.97683700  | -1.91712000 | -0.19627200 |
| C | -1.15966700 | 1.94728000  | 0.12689100  |
| H | -1.72227600 | 1.72463600  | 1.03972700  |
| H | -0.86974200 | 3.00091600  | 0.14707200  |
| H | -1.80457600 | 1.77065800  | -0.74155100 |
| N | -0.82387300 | -1.12075600 | 0.24723800  |
| N | -2.14148300 | -0.81481000 | 0.42734800  |
| O | -2.78608500 | -0.75905400 | -0.60243800 |

**I<sup>Me</sup>-N<sub>2</sub>O (inverted)**

E<sub>elec</sub> (M06/BS1) = -489.17786517 au

H<sub>corr</sub> (M06/BS1) = 0.151561 au

G<sub>corr</sub> (M06/BS1) = 0.105799 au

SPE (M06/BS2//M06/BS1) = -489.31367020 au

0 1

|   |            |            |            |
|---|------------|------------|------------|
| O | 6.10796100 | 5.89174500 | 1.14658200 |
| N | 7.10018000 | 4.35429700 | 3.39251800 |
| N | 6.04009700 | 2.56413900 | 2.76655500 |
| N | 4.85697800 | 4.59376800 | 2.40683700 |
| N | 4.98198700 | 5.65098700 | 1.62112400 |
| C | 5.97470000 | 3.91545300 | 2.78012700 |
| C | 7.87604000 | 3.26586300 | 3.75462500 |
| H | 8.82487000 | 3.39210200 | 4.25705200 |
| C | 7.21719300 | 2.15135500 | 3.36266700 |
| H | 7.47278800 | 1.10471100 | 3.44975800 |
| C | 7.39353700 | 5.74262100 | 3.69150000 |
| H | 7.67866900 | 6.26851800 | 2.77534600 |
| H | 8.19482000 | 5.77727500 | 4.43322000 |
| H | 6.49722800 | 6.21835200 | 4.10275500 |
| C | 5.02141700 | 1.71577200 | 2.17462000 |
| H | 4.03545300 | 2.05803300 | 2.49924600 |
| H | 5.18590400 | 0.68907600 | 2.50892700 |
| H | 5.07322000 | 1.75849800 | 1.08224200 |

**I<sup>Ph</sup>-N<sub>2</sub>O** (*normal*)

E<sub>elec</sub> (M06/BS1) = -872.35858883 au

H<sub>corr</sub> (M06/BS1) = 0.262389 au

G<sub>corr</sub> (M06/BS1) = 0.201261 au

SPE (M06/BS2//M06/BS1) = -872.58514436 au

0 1

|   |             |             |             |
|---|-------------|-------------|-------------|
| O | 0.88256300  | 3.18678600  | 0.04373200  |
| N | 0.97753600  | -0.79597900 | -0.22294000 |
| N | -1.20505200 | -0.77909300 | -0.15043700 |
| N | -0.18727400 | 1.32984800  | 0.20446400  |
| N | 0.86777700  | 2.00664100  | -0.28987800 |
| C | -0.10464000 | 0.02371500  | -0.06011300 |
| C | 0.53750100  | -2.10446200 | -0.42304800 |
| H | 1.24324100  | -2.91014000 | -0.56846900 |
| C | -0.80701100 | -2.09494800 | -0.37046700 |
| H | -1.53158900 | -2.88674300 | -0.49589500 |
| C | 2.36014700  | -0.46621800 | -0.05225100 |
| C | 3.24740000  | -0.74126700 | -1.08540800 |
| C | 4.60371500  | -0.49276800 | -0.89928500 |
| H | 5.30439700  | -0.70405700 | -1.70426000 |
| C | 5.05902100  | 0.03061400  | 0.30617700  |
| C | 4.15825000  | 0.29931400  | 1.33478500  |
| H | 4.51370600  | 0.70301100  | 2.28047800  |
| C | 2.80443600  | 0.04239400  | 1.16478100  |
| C | -2.56195800 | -0.35550600 | -0.03436400 |
| C | -3.42500500 | -1.10344000 | 0.76183900  |
| C | -4.76101700 | -0.73117100 | 0.85683500  |
| H | -5.43676500 | -1.31424400 | 1.47886200  |
| C | -5.22500400 | 0.38673600  | 0.17091600  |
| C | -4.35072700 | 1.13075700  | -0.61701000 |
| H | -4.71002600 | 2.00403000  | -1.15723800 |
| C | -3.01611200 | 0.76106500  | -0.73069100 |
| H | -3.04653000 | -1.96186200 | 1.31433200  |
| H | -2.32891400 | 1.33137300  | -1.34943800 |
| H | -6.26969600 | 0.67999400  | 0.25034200  |
| H | 2.87183800  | -1.13710600 | -2.02764900 |
| H | 2.08935200  | 0.23999100  | 1.96111200  |
| H | 6.11947700  | 0.22901700  | 0.44726200  |

**Cartesian coordinates, electronic energies ( $E_{\text{elec}}$ ), thermal corrections to enthalpies ( $H_{\text{corr}}$ ) and Gibbs ( $G_{\text{corr}}$ ) energies and single-point energies (SPE) for 1-thf, 1, 1-thf<sub>p</sub> & 1<sub>p</sub> (triplet) in Solvent = THF**

**1-thf\_T**

$E_{\text{elec}}$  (M06/BS1) = -423.54065376 au

$H_{\text{corr}}$  (M06/BS1) = 0.236754 au

$G_{\text{corr}}$  (M06/BS1) = 0.176691 au

SPE (M06/BS2//M06/BS1) = -423.10393712 au

0 3

|   |             |             |             |
|---|-------------|-------------|-------------|
| V | -0.41331500 | -0.45515600 | 0.22919800  |
| C | 0.02736400  | 0.72004000  | -1.40704600 |
| H | -0.28428100 | 1.76431200  | -1.22702800 |
| H | 1.11694900  | 0.72352800  | -1.58536600 |
| H | -0.46784300 | 0.37315100  | -2.32864200 |
| C | 0.29695600  | -2.38991200 | 0.14209800  |
| H | 1.38719500  | -2.37392800 | -0.03098400 |
| H | 0.12012600  | -2.90772300 | 1.10141200  |
| H | -0.16713000 | -2.98983700 | -0.65733600 |
| C | -2.32628400 | -0.23433400 | 0.96003300  |
| H | -2.43015800 | -0.72872700 | 1.94175200  |
| H | -2.54308800 | 0.83910800  | 1.10298300  |
| H | -3.09531100 | -0.64841900 | 0.28754800  |
| O | 0.85695600  | 0.35230500  | 1.61348200  |
| C | 0.99998100  | 1.79162200  | 1.73434200  |
| C | 1.03631000  | -0.28274200 | 2.90844900  |
| C | 1.66828800  | 1.99037000  | 3.07736200  |
| H | 1.57694800  | 2.13556800  | 0.87039000  |
| H | -0.00401600 | 2.24136400  | 1.70404600  |
| C | 1.05522300  | 0.86227400  | 3.90030700  |
| H | 0.21530000  | -0.99398500 | 3.05810800  |
| H | 1.98567900  | -0.83264200 | 2.87458500  |
| H | 1.47610500  | 2.98522800  | 3.49135900  |
| H | 2.75468500  | 1.85673700  | 2.98778400  |
| H | 0.03071100  | 1.12295900  | 4.20024800  |
| H | 1.62557000  | 0.61757300  | 4.80193400  |

## 1\_T

$E_{\text{elec}}(\text{M06/BS1}) = -191.21552336 \text{ au}$

$H_{\text{corr}}(\text{M06/BS1}) = 0.111711 \text{ au}$

$G_{\text{corr}}(\text{M06/BS1}) = 0.066878 \text{ au}$

$\text{SPE}(\text{M06/BS2//M06/BS1}) = -190.70294840 \text{ au}$

0 3

|   |             |             |             |
|---|-------------|-------------|-------------|
| V | 0.21208100  | 0.08900800  | 0.63252500  |
| C | 2.16881800  | 0.14764800  | 0.06387800  |
| H | 2.60358300  | -0.81333100 | 0.38909400  |
| H | 2.28656000  | 0.22855800  | -1.02568300 |
| H | 2.72547400  | 0.96538700  | 0.54805200  |
| C | -0.67025600 | 1.70368400  | -0.24453600 |
| H | -1.75596400 | 1.54202200  | -0.12663900 |
| H | -0.40293900 | 2.65782200  | 0.23567300  |
| H | -0.44724400 | 1.76638500  | -1.31895700 |
| C | -0.72744200 | -1.68601800 | 0.25601900  |
| H | -1.16685300 | -2.07085900 | 1.19372800  |
| H | -1.53703700 | -1.55230800 | -0.47618400 |
| H | -0.01747000 | -2.43466800 | -0.12605500 |

## 1-thf\_Tp

$E_{\text{elec}}$  (M06/BS1) = -998.30395409 au

$H_{\text{corr}}$  (M06/BS1) = 0.411241 au

$G_{\text{corr}}$  (M06/BS1) = 0.328097 au

SPE (M06/BS2//M06/BS1) = -998.02115452 au

0 3

|   |             |             |             |
|---|-------------|-------------|-------------|
| V | 0.00345800  | -0.01357900 | -0.12817100 |
| C | -0.94609500 | -1.71979000 | -0.73719600 |
| C | -0.27386800 | -2.73305900 | -1.44372200 |
| C | -0.79117400 | 1.70721400  | -0.89185100 |
| C | -0.92791100 | -3.89182700 | -1.86446200 |
| C | -2.18101000 | 1.90468200  | -0.99314300 |
| C | -2.28089300 | -4.06754900 | -1.58715700 |
| C | -2.72079000 | 3.11217300  | -1.43113600 |
| C | -2.97490900 | -3.08220400 | -0.88561300 |
| C | -1.87688900 | 4.16440600  | -1.78372000 |
| C | -2.31183700 | -1.93071400 | -0.46817800 |
| C | -0.49686700 | 3.99935800  | -1.69678500 |
| C | 0.03435800  | 2.78607600  | -1.25714200 |
| C | 2.04166000  | -0.11066400 | -0.26961000 |
| C | 2.68123700  | -0.16885100 | -1.52212600 |
| O | -0.59213100 | 0.09216600  | 1.80182800  |
| C | 4.06752500  | -0.23956900 | -1.63398100 |
| C | -0.53785800 | 1.33292300  | 2.56469900  |
| C | 4.85734700  | -0.25050300 | -0.48416700 |
| C | -0.26768100 | 0.89435800  | 3.98966900  |
| C | 4.25623800  | -0.18780400 | 0.76976500  |
| C | -0.93930600 | -0.47461900 | 4.04553100  |
| C | 2.86561200  | -0.11883200 | 0.86760800  |
| C | -0.58747800 | -1.05718200 | 2.69440200  |
| H | -0.38018100 | -4.66109000 | -2.40923200 |
| H | -3.80193700 | 3.23515200  | -1.50001300 |
| H | -4.03375600 | -3.21638700 | -0.66297600 |
| H | 0.16746400  | 4.81828300  | -1.97370700 |
| H | 4.53688800  | -0.28725900 | -2.61667000 |
| H | 0.24340700  | 1.96573500  | 2.12731700  |
| H | -1.50958600 | 1.82795900  | 2.44464400  |
| H | 0.81254800  | 0.79762500  | 4.16447200  |
| H | -0.66881700 | 1.60534000  | 4.71879200  |
| H | 4.87075300  | -0.19348700 | 1.67008100  |
| H | -0.58048500 | -1.09989400 | 4.86901600  |
| H | -2.02782000 | -0.36687300 | 4.14256400  |
| H | 0.42048100  | -1.49834600 | 2.67733800  |
| H | -1.30560300 | -1.77944700 | 2.29434600  |

|   |             |             |             |
|---|-------------|-------------|-------------|
| H | -2.87831600 | -1.17466200 | 0.08704500  |
| H | -2.79491300 | -4.97078200 | -1.91386400 |
| H | 0.79006100  | -2.62211300 | -1.66995100 |
| H | 2.07956100  | -0.15933000 | -2.43784800 |
| H | 5.94195300  | -0.30693600 | -0.56847300 |
| H | 1.12145800  | 2.68139700  | -1.19806900 |
| H | -2.86501700 | 1.09352500  | -0.72385400 |
| H | -2.29491500 | 5.10956500  | -2.12847200 |
| H | 2.41816200  | -0.07073500 | 1.86617600  |

## 1\_Tp

$E_{\text{elec}}$  (M06/BS1) = -765.97197072 au

$H_{\text{corr}}$  (M06/BS1) = 0.286546 au

$G_{\text{corr}}$  (M06/BS1) = 0.219363 au

SPE (M06/BS2//M06/BS1) = -765.61753425 au

0 3

|   |             |             |             |
|---|-------------|-------------|-------------|
| V | 0.20550600  | 0.26019800  | 0.58620800  |
| C | -0.87002900 | 1.67213700  | -0.38586100 |
| C | -0.48303400 | 3.00101800  | -0.13758900 |
| C | -1.98044400 | 1.46074500  | -1.22201000 |
| C | -1.17070900 | 4.07701400  | -0.69787000 |
| H | 0.37971100  | 3.21091600  | 0.50345100  |
| C | -2.66601000 | 2.52932700  | -1.79252200 |
| H | -2.31302100 | 0.44337100  | -1.43849100 |
| C | -2.26263600 | 3.83814500  | -1.52785400 |
| H | -0.85479300 | 5.09901400  | -0.49072600 |
| H | -3.51950600 | 2.34513100  | -2.44441300 |
| H | -2.80155400 | 4.67370700  | -1.97259200 |
| C | -0.24772800 | -1.62174900 | 0.00605500  |
| C | -1.58445700 | -1.93318600 | 0.31666000  |
| C | 0.51086400  | -2.60168400 | -0.65291600 |
| C | -2.14664800 | -3.16208100 | -0.02823000 |
| H | -2.22049800 | -1.20332900 | 0.83250200  |
| C | -0.04267400 | -3.83349100 | -0.99434000 |
| H | 1.55312400  | -2.39840200 | -0.90623500 |
| C | -1.37257900 | -4.11505900 | -0.68526100 |
| H | -3.18584900 | -3.37765300 | 0.21960100  |
| H | 0.56394500  | -4.57857500 | -1.50905200 |
| H | -1.80468500 | -5.07758000 | -0.95571000 |
| C | 2.20505400  | 0.37671400  | 0.27883300  |
| C | 3.01911700  | -0.45165000 | 1.07295400  |
| C | 2.84465800  | 1.27265200  | -0.59526100 |
| C | 4.41015600  | -0.38710000 | 1.00551300  |
| H | 2.55909800  | -1.17806800 | 1.75122200  |
| C | 4.23345000  | 1.34725600  | -0.66402300 |
| H | 2.24627000  | 1.92752200  | -1.23269300 |
| C | 5.01678200  | 0.51625600  | 0.13643800  |
| H | 5.02158600  | -1.03951000 | 1.62858300  |
| H | 4.70939800  | 2.05053600  | -1.34709700 |
| H | 6.10309700  | 0.57177400  | 0.07883800  |



**Cartesian coordinates, electronic energies ( $E_{\text{elec}}$ ), thermal corrections to enthalpies ( $H_{\text{corr}}$ ) and Gibbs ( $G_{\text{corr}}$ ) energies and single-point energies (SPE) for 1-thf, free THF & N2O (singlet) in Solvent = THF**

**1-thf\_S**

$E_{\text{elec}}$  (M06/BS1) = -423.49811973 au

$H_{\text{corr}}$  (M06/BS1) = 0.236408 au

$G_{\text{corr}}$  (M06/BS1) = 0.178777 au

SPE (M06/BS2//M06/BS1) = -423.05748730 au

0 1

|   |             |             |             |
|---|-------------|-------------|-------------|
| V | -0.43395600 | -0.42215800 | 0.20047100  |
| C | 0.04700000  | 0.58012900  | -1.50670300 |
| H | -0.52098700 | 1.50840500  | -1.28703300 |
| H | 1.09947000  | 0.86060900  | -1.67712000 |
| H | -0.35833700 | 0.15331000  | -2.43996200 |
| C | 0.40402500  | -2.28636000 | 0.14512200  |
| H | 1.50025900  | -2.32499400 | 0.27329900  |
| H | -0.05925000 | -2.70481700 | 1.06228000  |
| H | 0.12698900  | -2.94565500 | -0.69319900 |
| C | -2.31908700 | -0.13819600 | 0.94720600  |
| H | -2.50653900 | -0.63866200 | 1.91137900  |
| H | -2.55615000 | 0.93433800  | 1.05918900  |
| H | -3.00509000 | -0.56579800 | 0.19562100  |
| O | 0.64068100  | 0.38576900  | 1.67164400  |
| C | 0.89141500  | 1.81378300  | 1.80812700  |
| C | 0.97880800  | -0.30236200 | 2.90984000  |
| C | 1.70389700  | 1.93985400  | 3.07941300  |
| H | 1.39992900  | 2.14338200  | 0.89691100  |
| H | -0.08419300 | 2.31441300  | 1.88534000  |
| C | 1.14270200  | 0.80359900  | 3.92914400  |
| H | 0.16925900  | -1.00742100 | 3.12627900  |
| H | 1.90945900  | -0.85773400 | 2.73515500  |
| H | 1.59278200  | 2.92492700  | 3.54371600  |
| H | 2.76955000  | 1.77400700  | 2.87226800  |
| H | 0.16687000  | 1.08500600  | 4.34792900  |
| H | 1.79941200  | 0.51135900  | 4.75470500  |

**THF (free)**

$E_{\text{elec}}(\text{M06/BS1}) = -232.28834496 \text{ au}$

$H_{\text{corr}}(\text{M06/BS1}) = 0.122816 \text{ au}$

$G_{\text{corr}}(\text{M06/BS1}) = 0.088775 \text{ au}$

$\text{SPE}(\text{M06/BS2//M06/BS1}) = -232.35651638 \text{ au}$

0 1

|   |             |            |             |
|---|-------------|------------|-------------|
| C | -1.48234400 | 1.50140800 | 0.77638400  |
| O | -0.71486000 | 0.73946800 | -0.13454400 |
| C | 0.37049500  | 1.57589100 | -0.49426600 |
| C | -0.17709500 | 3.01366700 | -0.52938600 |
| C | -1.54982600 | 2.88966300 | 0.15428800  |
| H | -2.45393100 | 1.01096300 | 0.90232700  |
| H | -0.98018100 | 1.53991500 | 1.76210600  |
| H | 1.17513100  | 1.48755300 | 0.25766800  |
| H | 0.76328300  | 1.22290000 | -1.45445000 |
| H | 0.48802900  | 3.69896700 | 0.00874100  |
| H | -0.27189600 | 3.39006100 | -1.55398400 |
| H | -1.73727300 | 3.67675800 | 0.89301200  |
| H | -2.35671300 | 2.92619700 | -0.58790700 |

**N<sub>2</sub>O (free)**

$E_{\text{elec}}(\text{M06/BS1}) = -184.57266064 \text{ au}$

$H_{\text{corr}}(\text{M06/BS1}) = 0.015198 \text{ au}$

$G_{\text{corr}}(\text{M06/BS1}) = -0.009690 \text{ au}$

$\text{SPE}(\text{M06/BS2//M06/BS1}) = -184.62841534 \text{ au}$

0 1

|   |            |            |             |
|---|------------|------------|-------------|
| O | 0.00000000 | 0.00000000 | 1.11193100  |
| N | 0.00000000 | 0.00000000 | -1.20143700 |
| N | 0.00000000 | 0.00000000 | -0.06934100 |

**Cartesian coordinates, electronic energies ( $E_{\text{elec}}$ ), thermal corrections to enthalpies ( $H_{\text{corr}}$ ) and Gibbs ( $G_{\text{corr}}$ ) energies and single-point energies (SPE) for 4-9, 11, 6-thf, 4i, 7i, 8i, 10i, 11i, 6-thf<sub>p</sub> & 8<sub>p</sub> (triplet) in Solvent = THF**

**4\_T ( $\eta^{\square}$ -N1)**

$E_{\text{elec}}$  (M06/BS1) = -680.44150014 au

$H_{\text{corr}}$  (M06/BS1) = 0.265933 au

$G_{\text{corr}}$  (M06/BS1) = 0.195336 au

SPE (M06/BS2//M06/BS1) = -680.07567208 au

0 3

|   |             |             |             |
|---|-------------|-------------|-------------|
| C | -4.46952200 | 0.30929000  | -0.17242500 |
| C | -3.62150700 | 1.28621200  | -0.57906700 |
| C | -2.39986800 | -0.38814500 | 0.21099700  |
| N | -3.69763500 | -0.72121200 | 0.32510100  |
| H | -5.54890100 | 0.25485000  | -0.18098900 |
| H | -3.81028900 | 2.25815000  | -1.01278800 |
| N | -2.33690800 | 0.83891100  | -0.33794900 |
| C | -4.19487900 | -1.97977800 | 0.86034400  |
| H | -4.49763800 | -2.64156400 | 0.04228500  |
| H | -3.39624900 | -2.45430100 | 1.43522800  |
| H | -5.04849500 | -1.77693100 | 1.51180100  |
| C | -1.10239100 | 1.53175700  | -0.67984400 |
| H | -0.37452500 | 0.80053600  | -1.04710500 |
| H | -1.31978200 | 2.25560700  | -1.46811500 |
| H | -0.69398900 | 2.04551200  | 0.19450800  |
| N | -1.34553100 | -1.21355600 | 0.49140500  |
| N | -0.52335300 | -0.74861200 | 1.45280000  |
| O | 0.44849900  | -1.47897400 | 1.61815900  |
| V | -0.67697000 | -2.70709100 | -0.75434900 |
| C | -2.14274000 | -2.46934500 | -2.20222800 |
| C | -0.74869200 | -4.57969400 | 0.08895800  |
| C | 1.09978800  | -2.22893100 | -1.67330300 |
| H | -1.92574300 | -3.08381600 | -3.09192600 |
| H | -3.15427600 | -2.74046900 | -1.85175100 |
| H | -2.18043100 | -1.41251100 | -2.53041600 |
| H | -0.52296300 | -5.35521700 | -0.66292700 |
| H | -0.02754300 | -4.67465600 | 0.91718900  |
| H | -1.75843800 | -4.78078400 | 0.48751100  |
| H | 1.29581800  | -2.97289600 | -2.46595100 |
| H | 1.03416700  | -1.23955000 | -2.15877600 |
| H | 1.95662500  | -2.21953000 | -0.98172800 |

## 5\_T ( $\eta^2$ -N1,O)

$E_{\text{elec}}$  (M06/BS1) = -680.44452861 au

$H_{\text{corr}}$  (M06/BS1) = 0.266182 au

$G_{\text{corr}}$  (M06/BS1) = 0.198137 au

SPE (M06/BS2//M06/BS1) = -680.07262792 au

0 3

|   |            |            |             |
|---|------------|------------|-------------|
| O | 6.67819300 | 3.32407600 | 4.95286400  |
| N | 4.96921400 | 2.83195000 | 1.29921300  |
| N | 4.12518600 | 4.81856000 | 1.61024000  |
| N | 5.34038400 | 3.91145600 | 3.44852800  |
| N | 6.54040700 | 3.28218800 | 3.67249100  |
| C | 4.85536100 | 3.84254800 | 2.19210100  |
| C | 4.29630600 | 3.18618900 | 0.14095900  |
| H | 4.26280300 | 2.52406200 | -0.71264500 |
| C | 3.76495500 | 4.41398400 | 0.33713200  |
| H | 3.16824200 | 5.04414400 | -0.30687600 |
| C | 5.59300800 | 1.53573000 | 1.53239200  |
| H | 5.18366400 | 0.83119800 | 0.80401500  |
| H | 6.67788900 | 1.59954500 | 1.42215800  |
| H | 5.35470600 | 1.19375800 | 2.54312700  |
| C | 3.82053700 | 6.10562700 | 2.21231700  |
| H | 2.90821000 | 6.04517400 | 2.81363700  |
| H | 4.65551900 | 6.40477400 | 2.85357500  |
| H | 3.69231300 | 6.83989700 | 1.41320400  |
| V | 4.82522400 | 4.18553400 | 5.39450500  |
| C | 4.36487100 | 2.59409400 | 6.58899200  |
| H | 4.12362100 | 3.08721600 | 7.54786900  |
| H | 3.45757800 | 2.07713600 | 6.24188000  |
| H | 5.17864400 | 1.87473600 | 6.74265300  |
| C | 5.60603300 | 5.80012700 | 6.36171500  |
| H | 5.33335400 | 6.71282200 | 5.80693100  |
| H | 5.09526400 | 5.83194300 | 7.33927300  |
| H | 6.69213200 | 5.77223100 | 6.51502100  |
| C | 2.83629500 | 4.78353100 | 5.29471900  |
| H | 2.28558400 | 4.20750100 | 4.52936500  |
| H | 2.31036600 | 4.66172700 | 6.25515900  |
| H | 2.78253200 | 5.85036600 | 5.01620800  |

## 6\_T ( $\eta^{\square}$ -O<sub>syn</sub>)

E<sub>elec</sub> (M06/BS1) = -680.45080082 au

H<sub>corr</sub> (M06/BS1) = 0.265707 au

G<sub>corr</sub> (M06/BS1) = 0.196647 au

SPE (M06/BS2//M06/BS1) = -680.08028061 au

0 3

|   |             |             |             |
|---|-------------|-------------|-------------|
| C | -4.07604100 | 0.65917000  | -1.12759300 |
| C | -3.68169700 | 1.57491300  | -0.21753500 |
| C | -2.11328300 | -0.02139600 | -0.28421900 |
| N | -3.10543600 | -0.32530100 | -1.16696800 |
| H | -4.95552400 | 0.61250900  | -1.75424900 |
| H | -4.14659400 | 2.49318900  | 0.11334900  |
| N | -2.46557400 | 1.15852400  | 0.30946700  |
| C | -3.10795300 | -1.51155200 | -1.99784500 |
| H | -2.20232200 | -1.54337800 | -2.61413500 |
| H | -3.14470600 | -2.41241200 | -1.37566800 |
| H | -3.98820400 | -1.47817600 | -2.64419100 |
| C | -1.73463800 | 1.89967300  | 1.32611200  |
| H | -0.76612300 | 2.23163800  | 0.94331000  |
| H | -2.33796600 | 2.77066800  | 1.59652100  |
| H | -1.56980600 | 1.28224400  | 2.21237500  |
| N | -1.05516700 | -0.82491000 | -0.14775400 |
| N | -0.14121100 | -0.39544300 | 0.71280400  |
| O | 0.84474200  | -1.27784500 | 0.75486500  |
| V | 0.91931000  | -2.91180700 | -0.06573100 |
| C | 1.84727200  | -2.46426000 | -1.81704500 |
| H | 2.03247300  | -3.42774900 | -2.32041600 |
| H | 1.19562700  | -1.84706200 | -2.45580600 |
| H | 2.80666100  | -1.94813400 | -1.66842500 |
| C | -0.57327100 | -4.16755000 | -0.62861000 |
| H | -0.14058600 | -5.16229900 | -0.82368600 |
| H | -1.37001500 | -4.25419700 | 0.12547600  |
| H | -0.99932400 | -3.77965100 | -1.56647200 |
| C | 2.22213500  | -4.04944000 | 0.98076300  |
| H | 2.56060400  | -4.90634700 | 0.37898800  |
| H | 3.09030600  | -3.41152900 | 1.21148300  |
| H | 1.78466300  | -4.41200100 | 1.92397600  |

### 7\_T ( $\eta^{\square}$ -O<sub>anti</sub>)

E<sub>elec</sub> (M06/BS1) = -680.44728977 au

H<sub>corr</sub> (M06/BS1) = 0.265636 au

G<sub>corr</sub> (M06/BS1) = 0.196601 au

SPE (M06/BS2//M06/BS1) = -680.07669441 au

0 3

|   |             |             |             |
|---|-------------|-------------|-------------|
| C | -4.39759900 | 0.11541700  | -0.34294600 |
| C | -3.84294200 | 1.29116100  | 0.02320000  |
| C | -2.23527400 | -0.26678300 | 0.11404800  |
| N | -3.40464200 | -0.84397500 | -0.28677200 |
| H | -5.40743800 | -0.13190400 | -0.63890700 |
| H | -4.27161200 | 2.27964300  | 0.11382900  |
| N | -2.50243700 | 1.06279200  | 0.30677900  |
| C | -3.53912500 | -2.25166300 | -0.59900900 |
| H | -2.88195200 | -2.52110500 | -1.43237200 |
| H | -3.27236900 | -2.86079800 | 0.27072900  |
| H | -4.57835900 | -2.44557200 | -0.87497200 |
| C | -1.58258900 | 2.10113900  | 0.74471700  |
| H | -0.75361700 | 2.20864000  | 0.03989100  |
| H | -2.14241000 | 3.03921300  | 0.79485500  |
| H | -1.17527600 | 1.86784300  | 1.73230600  |
| N | -1.13357400 | -1.00613100 | 0.24655800  |
| N | -0.06913200 | -0.33152600 | 0.62183400  |
| O | 0.96339600  | -1.17742200 | 0.73709200  |
| V | 2.55415300  | -0.45154100 | 1.22189100  |
| C | 2.73597800  | 1.54651500  | 1.48923800  |
| H | 3.74362300  | 1.84873400  | 1.81174800  |
| H | 2.48759900  | 2.05195400  | 0.54203500  |
| H | 2.00153000  | 1.84854600  | 2.25405000  |
| C | 3.95570300  | -0.97391200 | -0.14429700 |
| H | 4.93115600  | -0.62975200 | 0.23623000  |
| H | 3.98504500  | -2.06925100 | -0.24951600 |
| H | 3.77213300  | -0.52053500 | -1.13027600 |
| C | 3.09677000  | -1.28919700 | 2.98596800  |
| H | 4.10360400  | -0.91181200 | 3.22810800  |
| H | 2.40729000  | -1.02715700 | 3.80283200  |
| H | 3.14427800  | -2.38454400 | 2.88947900  |

### 8\_T ( $\eta^2$ -N<sub>2</sub>O)

E<sub>elec</sub> (M06/BS1) = -680.45516855 au

H<sub>corr</sub> (M06/BS1) = 0.266289 au

G<sub>corr</sub> (M06/BS1) = 0.199501 au

SPE (M06/BS2//M06/BS1) = -680.08294883 au

0 3

|   |             |             |             |
|---|-------------|-------------|-------------|
| C | -4.33765100 | -0.73794800 | 0.15147800  |
| C | -4.19268200 | 0.57201800  | 0.45175600  |
| C | -2.17799100 | -0.21410000 | -0.11826300 |
| N | -3.09334800 | -1.21775200 | -0.20451900 |
| H | -5.21054000 | -1.37532300 | 0.15569200  |
| H | -4.91502700 | 1.31149200  | 0.76810400  |
| N | -2.85506900 | 0.90196900  | 0.28450600  |
| C | -2.76259500 | -2.57580600 | -0.59187900 |
| H | -2.29633200 | -2.58033200 | -1.58182900 |
| H | -2.06717400 | -3.01699700 | 0.12931800  |
| H | -3.68492800 | -3.16044600 | -0.61719000 |
| C | -2.32934600 | 2.24737000  | 0.46307500  |
| H | -1.71012400 | 2.52982500  | -0.39175600 |
| H | -3.17988100 | 2.93007400  | 0.53880900  |
| H | -1.72937600 | 2.31459400  | 1.37673300  |
| N | -0.90127500 | -0.44911600 | -0.43279000 |
| N | -0.07861100 | 0.55806200  | -0.20284000 |
| O | 1.19051900  | 0.26228700  | -0.52662100 |
| V | 1.29407000  | 1.00432600  | 1.21815300  |
| C | 1.72465400  | 2.96204400  | 1.47564100  |
| H | 2.16519000  | 3.11213200  | 2.47401300  |
| H | 2.44820900  | 3.28593600  | 0.71272200  |
| H | 0.81089000  | 3.57062200  | 1.38787100  |
| C | 3.05384500  | 0.05503200  | 1.61420400  |
| H | 3.42113900  | 0.43336000  | 2.58312100  |
| H | 2.88198300  | -1.02817400 | 1.70229800  |
| H | 3.81199800  | 0.23992900  | 0.83865400  |
| C | 0.17133700  | 0.27771600  | 2.75893600  |
| H | 0.70441600  | 0.48367400  | 3.70154800  |
| H | -0.85020700 | 0.68399700  | 2.82213700  |
| H | 0.10699300  | -0.81559000 | 2.63174100  |

### 9\_T ( $\eta^3$ -N1,N2,O)

$E_{\text{elec}}$  (M06/BS1) = -680.44765714 au

$H_{\text{corr}}$  (M06/BS1) = 0.266323 au

$G_{\text{corr}}$  (M06/BS1) = 0.199577 au

SPE (M06/BS2//M06/BS1) = -680.07631802 au

0 3

|   |             |             |             |
|---|-------------|-------------|-------------|
| C | -4.42217400 | 1.23251300  | -0.46785000 |
| C | -3.43787500 | 2.01839900  | 0.02539700  |
| C | -2.67179000 | -0.07589900 | -0.00468800 |
| N | -3.94288500 | -0.06047000 | -0.48635300 |
| H | -5.42004400 | 1.47039300  | -0.80870000 |
| H | -3.40152000 | 3.08460800  | 0.19983600  |
| N | -2.35192400 | 1.20927500  | 0.31413900  |
| C | -4.68387800 | -1.22526200 | -0.94006000 |
| H | -4.01437800 | -2.08768700 | -0.93421300 |
| H | -5.52840900 | -1.41479900 | -0.26968200 |
| H | -5.05327000 | -1.05036700 | -1.95505900 |
| C | -1.09225700 | 1.70895300  | 0.85469600  |
| H | -0.26480900 | 1.46468400  | 0.18475300  |
| H | -1.18318200 | 2.79426900  | 0.94633000  |
| H | -0.89870700 | 1.26859800  | 1.83646200  |
| N | -1.97816700 | -1.22579200 | 0.06734100  |
| N | -0.76892000 | -1.11872200 | 0.62786300  |
| O | -0.24246800 | -2.36545200 | 0.72263500  |
| V | -1.56854100 | -2.55880200 | 2.04146300  |
| C | -0.57156400 | -3.80823700 | 3.30917200  |
| H | -1.19507500 | -4.00155500 | 4.19583600  |
| H | -0.32644700 | -4.76510200 | 2.82199200  |
| H | 0.35969900  | -3.32189000 | 3.63715000  |
| C | -3.32717000 | -3.56429800 | 1.82961800  |
| H | -3.54405600 | -4.13994200 | 2.74209600  |
| H | -4.15005000 | -2.85565900 | 1.64945600  |
| H | -3.25565800 | -4.25414700 | 0.97456700  |
| C | -1.83692400 | -1.08660100 | 3.43604100  |
| H | -2.37135000 | -1.53232800 | 4.29079400  |
| H | -0.86382100 | -0.71583900 | 3.79462500  |
| H | -2.42650200 | -0.24057400 | 3.04574500  |



## 11\_T ( $\eta^{\square}$ -N2)

$E_{\text{elec}}$  (M06/BS1) = -680.44176620 au

$H_{\text{corr}}$  (M06/BS1) = 0.266436 au

$G_{\text{corr}}$  (M06/BS1) = 0.199022 au

SPE (M06/BS2//M06/BS1) = -680.07569946 au

0 3

|   |             |             |             |
|---|-------------|-------------|-------------|
| C | -4.41706200 | -0.62175700 | -0.03052800 |
| C | -4.29691900 | 0.71003000  | -0.24041600 |
| C | -2.24591300 | -0.16459600 | -0.24610400 |
| N | -3.14063100 | -1.15391100 | -0.03438300 |
| H | -5.28780700 | -1.24307700 | 0.12488300  |
| H | -5.04222500 | 1.49001100  | -0.31192400 |
| N | -2.94852700 | 0.98567400  | -0.38165500 |
| C | -2.79605200 | -2.54453400 | 0.21064300  |
| H | -1.71879300 | -2.65894300 | 0.07012900  |
| H | -3.06258700 | -2.81797200 | 1.23653400  |
| H | -3.33098200 | -3.18652500 | -0.49484400 |
| C | -2.38082700 | 2.28392600  | -0.70310500 |
| H | -1.45437300 | 2.13743200  | -1.26524200 |
| H | -3.09570700 | 2.83528200  | -1.31933000 |
| H | -2.16657600 | 2.85351500  | 0.20915800  |
| N | -0.91605600 | -0.35721000 | -0.43658200 |
| N | -0.17034100 | 0.33041000  | 0.40781800  |
| O | 1.05933700  | 0.36781100  | 0.19231300  |
| V | -0.42695500 | 1.07360000  | 2.20664100  |
| C | -0.00619500 | -0.73549900 | 3.06644600  |
| C | -2.28723400 | 1.51862300  | 2.93317100  |
| C | 0.80484500  | 2.62489700  | 2.68957000  |
| H | -0.01057100 | -0.63552400 | 4.16410900  |
| H | -0.79163300 | -1.45780000 | 2.77988600  |
| H | 0.96740100  | -1.13346200 | 2.74106900  |
| H | -2.16786500 | 1.73480000  | 4.00917600  |
| H | -2.80403200 | 2.37116500  | 2.46470700  |
| H | -2.93167500 | 0.62660800  | 2.84691400  |
| H | 0.72731400  | 2.83326200  | 3.76929000  |
| H | 1.85388700  | 2.41383100  | 2.43684700  |
| H | 0.48088400  | 3.52208000  | 2.13408800  |

## 6-thf\_T

$E_{\text{elec}}(\text{M06/BS1}) = -912.75225537 \text{ au}$

$H_{\text{corr}}(\text{M06/BS1}) = 0.391670 \text{ au}$

$G_{\text{corr}}(\text{M06/BS1}) = 0.310498 \text{ au}$

$\text{SPE}(\text{M06/BS2//M06/BS1}) = -912.45129512 \text{ au}$

0 3

|   |             |             |             |
|---|-------------|-------------|-------------|
| O | 0.72097000  | -0.99616700 | 0.70357000  |
| N | -3.75982700 | -0.60491500 | 0.69240600  |
| N | -2.85512600 | -0.23045000 | -1.26964000 |
| N | -1.42896400 | -0.79084800 | 0.68165800  |
| N | -0.33978100 | -0.73690900 | -0.06796800 |
| C | -2.56408600 | -0.55272000 | 0.03189100  |
| C | -4.78744100 | -0.31287700 | -0.18600200 |
| H | -5.81959500 | -0.30021900 | 0.13501100  |
| C | -4.23204400 | -0.08183200 | -1.39435400 |
| H | -4.68148400 | 0.17345100  | -2.34404900 |
| C | -1.92289900 | -0.04793700 | -2.36953100 |
| H | -2.50484300 | 0.20640700  | -3.26007700 |
| H | -1.22235800 | 0.76476900  | -2.15410100 |
| H | -1.35267000 | -0.96175800 | -2.55700200 |
| C | -3.88241200 | -0.92146600 | 2.09913900  |
| H | -3.43842300 | -1.90071900 | 2.30652600  |
| H | -3.37005800 | -0.16834000 | 2.70752100  |
| H | -4.94378900 | -0.93894100 | 2.35826100  |
| V | 2.38251300  | -0.80049300 | -0.00357900 |
| C | 3.91317500  | -0.63859500 | 1.33470400  |
| H | 4.71483200  | -1.35623600 | 1.10945600  |
| H | 4.32449600  | 0.38041600  | 1.38756200  |
| H | 3.47834400  | -0.89877200 | 2.31471900  |
| C | 2.68229400  | -2.80612700 | -0.36128700 |
| H | 2.58281700  | -3.37488500 | 0.57731800  |
| H | 1.93340400  | -3.17769800 | -1.08101400 |
| H | 3.68697600  | -2.98221200 | -0.77416300 |
| C | 2.88891300  | -0.31610100 | -1.92710300 |
| H | 3.12881800  | 0.74700300  | -2.07322600 |
| H | 3.72165100  | -0.93695500 | -2.28700900 |
| H | 1.99117800  | -0.56816500 | -2.51948900 |
| O | 1.99308500  | 1.46223800  | 0.30562900  |
| C | 1.65025600  | 1.86806600  | 1.64617700  |
| C | 1.15548100  | 2.15818900  | -0.63802300 |
| C | 0.77082500  | 3.09302000  | 1.48671200  |
| H | 1.10369200  | 1.04227100  | 2.12757500  |
| H | 2.58040600  | 2.04949200  | 2.19628000  |
| C | 0.04292600  | 2.77394300  | 0.18622300  |

|   |             |            |             |
|---|-------------|------------|-------------|
| H | 1.76279700  | 2.92376600 | -1.14414000 |
| H | 0.80537100  | 1.43378200 | -1.38369400 |
| H | 1.38238200  | 3.99851100 | 1.37027500  |
| H | 0.10159900  | 3.23793800 | 2.34142700  |
| H | -0.40533300 | 3.64882500 | -0.29706400 |
| H | -0.74586600 | 2.02720000 | 0.36464500  |

#### 4i\_T ( $\eta^{\square}$ -N1)

$E_{\text{elec}}$  (M06/BS1) = -680.43785883 au

$H_{\text{corr}}$  (M06/BS1) = 0.266056 au

$G_{\text{corr}}$  (M06/BS1) = 0.197272 au

SPE (M06/BS2//M06/BS1) = -680.07389436 au

0 3

|   |             |             |             |
|---|-------------|-------------|-------------|
| C | -4.48039200 | 0.17496300  | -0.10147700 |
| C | -3.70110300 | 1.15345800  | -0.62523900 |
| C | -2.36359900 | -0.41586300 | 0.18630400  |
| N | -3.63413400 | -0.78979700 | 0.40927600  |
| H | -5.55485900 | 0.07717000  | -0.03814400 |
| H | -3.95776100 | 2.08565200  | -1.10860700 |
| N | -2.38762300 | 0.77269800  | -0.43907000 |
| C | -4.04439100 | -2.04243300 | 1.02511400  |
| H | -4.39063400 | -2.74123000 | 0.25596700  |
| H | -3.18741000 | -2.47270200 | 1.54870900  |
| H | -4.84917700 | -1.84470300 | 1.73757200  |
| C | -1.20193500 | 1.51267900  | -0.83927400 |
| H | -0.46222700 | 0.81005700  | -1.23784200 |
| H | -1.48165200 | 2.22737100  | -1.61570800 |
| H | -0.77933100 | 2.03442200  | 0.02463900  |
| N | -1.24426700 | -1.18986300 | 0.43218000  |
| N | -0.38236500 | -0.75236800 | 1.36703800  |
| O | -0.70258200 | 0.26782300  | 1.96844900  |
| V | -0.76215600 | -2.69998300 | -0.87568300 |
| C | -2.14009300 | -2.23762300 | -2.36059500 |
| C | -0.98225600 | -4.55659100 | -0.02261900 |
| C | 1.17466900  | -2.27431300 | -1.42073600 |
| H | -2.03915000 | -2.91223900 | -3.22722500 |
| H | -3.18822400 | -2.29862500 | -2.01457500 |
| H | -1.97671600 | -1.20633300 | -2.72478900 |
| H | -0.70717100 | -5.35823500 | -0.72889100 |
| H | -0.32920500 | -4.63937600 | 0.86328400  |
| H | -2.02104000 | -4.73183100 | 0.30522300  |
| H | 1.55491300  | -2.94654500 | -2.20768200 |
| H | 1.25453400  | -1.23668200 | -1.78883000 |
| H | 1.82852100  | -2.36486400 | -0.53599500 |

7i\_T ( $\eta^{\square}$ -O<sub>anti</sub>)

E<sub>elec</sub> (M06/BS1) = -680.43800125 au

H<sub>corr</sub> (M06/BS1) = 0.265018 au

G<sub>corr</sub> (M06/BS1) = 0.195247 au

SPE (M06/BS2//M06/BS1) = -680.06825318 au

0 3

|   |             |             |             |
|---|-------------|-------------|-------------|
| C | -4.60900600 | 0.09140600  | -0.02382400 |
| C | -4.12898800 | 1.28610800  | -0.43448500 |
| C | -2.37456700 | -0.06225400 | -0.09505800 |
| N | -3.52289400 | -0.73962900 | 0.17751900  |
| H | -5.62074600 | -0.24913000 | 0.14687800  |
| H | -4.63750900 | 2.19997200  | -0.70927000 |
| N | -2.74716900 | 1.19094500  | -0.48112400 |
| C | -3.57938800 | -2.10201700 | 0.67201600  |
| H | -2.60714000 | -2.56926800 | 0.50076600  |
| H | -3.80483400 | -2.11178500 | 1.74386800  |
| H | -4.35396800 | -2.65291700 | 0.13067000  |
| C | -1.87384900 | 2.21187300  | -1.03124400 |
| H | -1.02166300 | 1.73425200  | -1.52351800 |
| H | -2.43872000 | 2.78702900  | -1.77002400 |
| H | -1.50061300 | 2.87324500  | -0.24342300 |
| N | -1.18018200 | -0.68185200 | -0.12228900 |
| N | -0.07254400 | -0.11332100 | 0.28091800  |
| O | -0.25804100 | 1.02004400  | 0.97589800  |
| V | 1.20597000  | 1.95869800  | 1.55435400  |
| C | 3.08637500  | 1.26882400  | 1.24337900  |
| H | 3.84618900  | 1.97864900  | 1.60584800  |
| H | 3.21859900  | 0.30247100  | 1.75559600  |
| H | 3.22461100  | 1.11648700  | 0.16074600  |
| C | 1.04999200  | 2.37657800  | 3.53522100  |
| H | 1.87598000  | 3.05533300  | 3.80364600  |
| H | 0.09661800  | 2.89152100  | 3.73267500  |
| H | 1.10767200  | 1.47507400  | 4.16454000  |
| C | 1.11729400  | 3.74029300  | 0.57480200  |
| H | 1.98229300  | 4.33950000  | 0.90365000  |
| H | 1.16840200  | 3.61542100  | -0.51880800 |
| H | 0.19733200  | 4.28930200  | 0.83265500  |

### 8i\_T ( $\eta^2$ -N<sub>2</sub>,O)

E<sub>elec</sub> (M06/BS1) = -680.44661873 au

H<sub>corr</sub> (M06/BS1) = 0.265767 au

G<sub>corr</sub> (M06/BS1) = 0.195889 au

SPE (M06/BS2//M06/BS1) = -680.07491620 au

0 3

|   |             |             |             |
|---|-------------|-------------|-------------|
| C | -4.33388700 | -0.22960900 | 0.56195600  |
| C | -4.22810600 | 1.10540800  | 0.37427500  |
| C | -2.26394200 | 0.19159700  | -0.17550600 |
| N | -3.11894000 | -0.78959800 | 0.21743200  |
| H | -5.15721900 | -0.83508900 | 0.91387800  |
| H | -4.94611200 | 1.90077700  | 0.51809200  |
| N | -2.94630000 | 1.36771700  | -0.08307600 |
| C | -2.75906900 | -2.19345000 | 0.28025100  |
| H | -2.62668900 | -2.60118600 | -0.72726000 |
| H | -1.82422000 | -2.31189900 | 0.83692500  |
| H | -3.56091500 | -2.73223800 | 0.79036900  |
| C | -2.49218800 | 2.66290200  | -0.56149400 |
| H | -1.95456800 | 2.53386400  | -1.50627100 |
| H | -3.37096700 | 3.28916300  | -0.73270900 |
| H | -1.82103700 | 3.12919900  | 0.16426300  |
| N | -1.05767600 | -0.11122100 | -0.67688100 |
| N | -0.05460900 | 0.73602100  | -0.54780900 |
| O | -0.09255200 | 1.60992600  | 0.48963000  |
| V | 1.62692700  | 0.77683200  | 0.53581100  |
| C | 1.85138500  | -1.24417600 | 0.52338800  |
| H | 2.80613000  | -1.49108000 | 1.01596600  |
| H | 1.03096400  | -1.68711900 | 1.11132800  |
| H | 1.82838400  | -1.67227900 | -0.48963700 |
| C | 1.84099500  | 1.11557600  | 2.53794500  |
| H | 2.87508900  | 0.84277200  | 2.80849200  |
| H | 1.65813600  | 2.16563900  | 2.81154400  |
| H | 1.15263100  | 0.47078800  | 3.10484600  |
| C | 3.22747700  | 1.65459200  | -0.32324500 |
| H | 4.14971000  | 1.29916200  | 0.16265100  |
| H | 3.25142900  | 1.38359000  | -1.39019000 |
| H | 3.16682100  | 2.74867500  | -0.22711400 |

### 10i\_T ( $\eta^{\square}$ -N1,N2)

$E_{\text{elec}}$  (M06/BS1) = -680.43431574 au

$H_{\text{corr}}$  (M06/BS1) = 0.266051 au

$G_{\text{corr}}$  (M06/BS1) = 0.198785 au

SPE (M06/BS2//M06/BS1) = -680.06748685 au

0 3

|   |            |             |            |
|---|------------|-------------|------------|
| V | 5.86085400 | 0.55811000  | 5.80257700 |
| N | 4.75457100 | 2.08890000  | 5.05211400 |
| N | 5.61289300 | 1.53167900  | 4.08648300 |
| N | 4.13562300 | 4.20743000  | 5.98297400 |
| N | 3.85294300 | 3.96898900  | 3.83110200 |
| C | 4.31928600 | 3.34860300  | 4.94838300 |
| C | 3.54853600 | 5.36918200  | 5.51230000 |
| H | 3.31478300 | 6.19128600  | 6.17402300 |
| C | 3.38111000 | 5.22437200  | 4.17960600 |
| H | 2.97112900 | 5.89545900  | 3.43790600 |
| C | 4.47186800 | 3.91997700  | 7.36353600 |
| C | 3.68317600 | 3.35232300  | 2.52665200 |
| C | 4.86743600 | -1.19365700 | 5.92034600 |
| H | 3.91849000 | -1.03501500 | 6.45599900 |
| H | 4.66171300 | -1.60336300 | 4.92113500 |
| H | 5.48456700 | -1.90764300 | 6.48827600 |
| C | 7.79395500 | 0.19899800  | 5.27207500 |
| H | 8.36612500 | 1.13687600  | 5.35664700 |
| H | 8.19748700 | -0.52276200 | 6.00096900 |
| H | 7.90238500 | -0.19520000 | 4.25199800 |
| C | 6.29241000 | 1.03997600  | 7.75409900 |
| H | 6.77173900 | 0.14333000  | 8.18370300 |
| H | 7.02675800 | 1.86007300  | 7.80626100 |
| H | 5.41992100 | 1.29990400  | 8.37308000 |
| O | 6.21484500 | 2.28679400  | 3.29623300 |
| H | 5.48621900 | 3.51613400  | 7.42254300 |
| H | 4.41397400 | 4.85019600  | 7.93328100 |
| H | 3.77242300 | 3.18917900  | 7.78475300 |
| H | 4.61718500 | 3.37832000  | 1.96035500 |
| H | 3.38120800 | 2.30897400  | 2.66257700 |
| H | 2.89238400 | 3.88850600  | 1.99614700 |

## 11i\_T ( $\eta^{\square}$ -N2)

$E_{\text{elec}}$  (M06/BS1) = -680.44110162 au

$H_{\text{corr}}$  (M06/BS1) = 0.265817 au

$G_{\text{corr}}$  (M06/BS1) = 0.195355au

SPE (M06/BS2//M06/BS1) = -680.07371014 au

0 3

|   |             |             |             |
|---|-------------|-------------|-------------|
| C | -4.36197700 | -0.37828400 | 0.65687000  |
| C | -4.19137500 | 0.96329500  | 0.70112100  |
| C | -2.33084400 | 0.07659900  | -0.15138200 |
| N | -3.20654400 | -0.91822100 | 0.12749000  |
| H | -5.19422500 | -0.99945300 | 0.95670300  |
| H | -4.84654300 | 1.75201800  | 1.04389000  |
| N | -2.93275500 | 1.24201800  | 0.19563100  |
| C | -2.93562600 | -2.32552400 | -0.11021600 |
| H | -2.91645500 | -2.53227800 | -1.18486400 |
| H | -1.96822000 | -2.59456800 | 0.32318700  |
| H | -3.72558600 | -2.91288000 | 0.36287400  |
| C | -2.41221800 | 2.57704800  | -0.04497400 |
| H | -1.96511600 | 2.61870900  | -1.04337200 |
| H | -3.24578700 | 3.28166100  | 0.00389600  |
| H | -1.64785800 | 2.82563800  | 0.69542400  |
| N | -1.17667600 | -0.17127500 | -0.81485900 |
| N | -0.07930800 | 0.45375400  | -0.42155100 |
| O | -0.05774900 | 1.15304700  | 0.62309900  |
| V | 1.62357500  | 0.14878900  | -1.32080100 |
| C | 2.91427400  | 1.71397100  | -1.15461300 |
| C | 1.46315600  | -0.40907500 | -3.26963600 |
| C | 2.14125900  | -1.43726200 | -0.14288700 |
| H | 3.88952900  | 1.44544800  | -1.59297600 |
| H | 2.53290700  | 2.61606400  | -1.65904000 |
| H | 3.05838200  | 1.94296100  | -0.08673700 |
| H | 2.43972500  | -0.71078800 | -3.68154400 |
| H | 0.77862300  | -1.27202400 | -3.31651100 |
| H | 1.04657000  | 0.40020400  | -3.89041300 |
| H | 3.12982900  | -1.82294700 | -0.44121400 |
| H | 2.18361200  | -1.13028200 | 0.91524000  |
| H | 1.40018400  | -2.24814900 | -0.24140300 |



## 6-thf\_Tp

$E_{\text{elec}}$  (M06/BS1) = -1870.69169431 au  
 $H_{\text{corr}}$  (M06/BS1) = 0.675869 au  
 $G_{\text{corr}}$  (M06/BS1) = 0.559550 au  
SPE (M06/BS2//M06/BS1) = -1870.64924756 au

0 3

|   |             |             |             |
|---|-------------|-------------|-------------|
| O | 0.31514300  | -1.53621400 | 0.66505600  |
| N | -4.08122800 | -0.84173100 | 0.07185200  |
| N | -2.75641600 | 0.16864700  | -1.34300700 |
| N | -1.76691900 | -1.03173800 | 0.56668800  |
| N | -0.65615100 | -1.21978300 | -0.11886900 |
| C | -2.77337800 | -0.58073200 | -0.20292300 |
| C | -4.88093900 | -0.27982700 | -0.91464900 |
| H | -5.95760600 | -0.36623400 | -0.87645300 |
| C | -4.06505600 | 0.34523900  | -1.78712300 |
| H | -4.27838300 | 0.93646700  | -2.66660800 |
| V | 0.42052800  | -1.73825700 | 2.52348700  |
| O | -0.43834200 | -3.80091100 | 2.24385800  |
| C | 0.26678400  | -4.70166200 | 1.36217900  |
| C | -1.86274300 | -3.99719700 | 2.10569400  |
| C | -0.78292900 | -5.67115400 | 0.85336000  |
| H | 0.70091800  | -4.10975500 | 0.54218600  |
| H | 1.08237800  | -5.16585900 | 1.92857700  |
| C | -2.02653100 | -4.79006300 | 0.82772100  |
| H | -2.22691400 | -4.55091700 | 2.98523800  |
| H | -2.33906800 | -3.01202100 | 2.08328300  |
| H | -0.92063300 | -6.49936400 | 1.56243600  |
| H | -0.51806000 | -6.09412100 | -0.12159600 |
| H | -2.96812800 | -5.35016200 | 0.79937800  |
| H | -2.00080600 | -4.11064100 | -0.03864500 |
| C | -1.63733800 | 0.83967000  | -1.93392900 |
| C | -0.86791000 | 1.70898000  | -1.16647500 |
| C | -1.38654900 | 0.65490800  | -3.28820800 |
| C | 0.18428300  | 2.38632200  | -1.77023000 |
| H | -1.08633700 | 1.84754200  | -0.10811400 |
| C | -0.33885100 | 1.35015900  | -3.88443200 |
| H | -2.00189700 | -0.03463900 | -3.86393700 |
| C | 0.44903700  | 2.21103400  | -3.12689700 |
| H | 0.79461200  | 3.06428700  | -1.17662800 |
| H | -0.13570300 | 1.20979500  | -4.94398700 |
| H | 1.27140300  | 2.74848600  | -3.59446700 |
| C | -4.55185300 | -1.67204200 | 1.13538500  |
| C | -5.27480400 | -2.82042800 | 0.82470400  |
| C | -4.27922100 | -1.32254600 | 2.45295700  |

|   |             |             |             |
|---|-------------|-------------|-------------|
| C | -5.72433200 | -3.63506200 | 1.85904300  |
| H | -5.46612300 | -3.07634200 | -0.21655700 |
| C | -4.72024500 | -2.15140500 | 3.47817500  |
| H | -3.70375500 | -0.42569300 | 2.67344200  |
| C | -5.44235600 | -3.30514400 | 3.18282800  |
| H | -6.28865600 | -4.53584900 | 1.62621600  |
| H | -4.47666300 | -1.89236100 | 4.50827200  |
| H | -5.78638300 | -3.95195400 | 3.98756900  |
| C | -0.90152800 | -1.50990800 | 4.09580500  |
| C | -1.11665500 | -2.54832400 | 5.01727100  |
| C | -1.58864000 | -0.30658200 | 4.33182500  |
| C | -1.94819500 | -2.39271900 | 6.12777300  |
| H | -0.62893100 | -3.51583600 | 4.86761400  |
| C | -2.44026900 | -0.14415000 | 5.42315900  |
| H | -1.44720900 | 0.53283100  | 3.64580900  |
| C | -2.61426100 | -1.18726100 | 6.33323000  |
| H | -2.08038300 | -3.21521000 | 6.83133100  |
| H | -2.95835800 | 0.80354500  | 5.57500700  |
| H | -3.26505300 | -1.05894700 | 7.19778900  |
| C | 1.22672800  | 0.16401200  | 2.78661200  |
| C | 1.69148400  | 0.58638100  | 4.04801500  |
| C | 1.35185500  | 1.09830000  | 1.74282600  |
| C | 2.22697100  | 1.85443100  | 4.26049300  |
| H | 1.62971900  | -0.10010100 | 4.89822400  |
| C | 1.88133100  | 2.37583600  | 1.94224700  |
| H | 1.03707100  | 0.82402200  | 0.73197400  |
| C | 2.31960100  | 2.76160500  | 3.20487200  |
| H | 2.57600000  | 2.13920400  | 5.25417200  |
| H | 1.96000000  | 3.07176000  | 1.10466000  |
| H | 2.73671700  | 3.75557000  | 3.36585900  |
| C | 2.18199800  | -2.63724600 | 2.99918400  |
| C | 2.39784500  | -3.35182500 | 4.18741800  |
| C | 3.22757000  | -2.61250100 | 2.06146200  |
| C | 3.59830800  | -4.02240100 | 4.42503200  |
| H | 1.61568900  | -3.39367700 | 4.95015000  |
| C | 4.42357300  | -3.29171500 | 2.28608400  |
| H | 3.10781500  | -2.05294800 | 1.12911100  |
| C | 4.61293700  | -3.99993600 | 3.47175200  |
| H | 3.74027500  | -4.56677200 | 5.35924000  |
| H | 5.21543900  | -3.26086400 | 1.53710000  |
| H | 5.54929500  | -4.52643100 | 3.65332500  |

## 8\_Tp

$E_{\text{elec}}(\text{M06/BS1}) = -1638.38669728 \text{ au}$   
 $H_{\text{corr}}(\text{M06/BS1}) = 0.551350 \text{ au}$   
 $G_{\text{corr}}(\text{M06/BS1}) = 0.450334 \text{ au}$   
 $\text{SPE}(\text{M06/BS2//M06/BS1}) = -1638.27149235 \text{ au}$

0 3

|   |             |             |             |
|---|-------------|-------------|-------------|
| O | 0.30208900  | 0.82407700  | -2.05015000 |
| N | -1.63323400 | -2.08251700 | 0.17094400  |
| N | -3.41978600 | -0.83073300 | -0.06137000 |
| N | -1.57259500 | -0.12079500 | -1.33586700 |
| N | -0.25950800 | -0.17174100 | -1.35991300 |
| C | -2.12976900 | -0.99151000 | -0.48877200 |
| C | -2.60774000 | -2.56026000 | 1.04347300  |
| H | -2.43051300 | -3.44203100 | 1.64296100  |
| C | -3.70315200 | -1.78856800 | 0.90250700  |
| H | -4.67854600 | -1.84935700 | 1.36390400  |
| V | 1.27845300  | 0.66896100  | -0.41403500 |
| C | -0.40944000 | -2.78635100 | -0.06714500 |
| C | 0.38647600  | -3.12346100 | 1.02147000  |
| C | -0.07062700 | -3.18497800 | -1.35800800 |
| C | 1.55477100  | -3.85098500 | 0.81138600  |
| C | 1.09820400  | -3.90811500 | -1.55590100 |
| C | 1.91291300  | -4.24040200 | -0.47453100 |
| H | 2.18710900  | -4.10712500 | 1.65934400  |
| H | 1.37529700  | -4.21411000 | -2.56309700 |
| C | -4.29077000 | 0.24400700  | -0.40706800 |
| C | -4.95593600 | 0.91703000  | 0.61527900  |
| C | -4.49703300 | 0.58405100  | -1.74163100 |
| C | -5.83999800 | 1.94153800  | 0.29596300  |
| C | -5.37391300 | 1.61776600  | -2.04709000 |
| C | -6.04810100 | 2.29508500  | -1.03372100 |
| H | -6.35950900 | 2.46947100  | 1.09286600  |
| H | -5.53741800 | 1.88886500  | -3.08801100 |
| C | 2.99035000  | -0.38606900 | -0.49193800 |
| C | 3.92955400  | -0.40777600 | 0.55324200  |
| C | 3.24228100  | -1.18147700 | -1.62135400 |
| C | 5.05929100  | -1.21898400 | 0.48780800  |
| C | 4.37831400  | -1.98518100 | -1.69771000 |
| C | 5.28283600  | -2.00928000 | -0.63955600 |
| H | 5.77280500  | -1.23030900 | 1.31124200  |
| H | 4.55260400  | -2.60232700 | -2.57915800 |
| C | 0.29277200  | 0.56926500  | 1.36934300  |
| C | -0.97027700 | 1.16086500  | 1.54203600  |
| C | 0.83619200  | -0.11719700 | 2.46704700  |

|   |             |             |             |
|---|-------------|-------------|-------------|
| C | -1.66419900 | 1.06248300  | 2.74617300  |
| C | 0.14922400  | -0.21502900 | 3.67891400  |
| C | -1.10606100 | 0.36914100  | 3.81990400  |
| H | -2.64291000 | 1.53316500  | 2.85059900  |
| H | 0.59679000  | -0.75575000 | 4.51341800  |
| C | 1.86166000  | 2.61786200  | -0.41018800 |
| C | 2.10631900  | 3.30630800  | -1.61106200 |
| C | 2.20423000  | 3.26705000  | 0.78926100  |
| C | 2.67166300  | 4.57920000  | -1.61859800 |
| C | 2.77557500  | 4.53964100  | 0.78968000  |
| C | 3.00807600  | 5.19788300  | -0.41545200 |
| H | 2.85186100  | 5.09175600  | -2.56375100 |
| H | 3.03332700  | 5.02223000  | 1.73261000  |
| H | 6.16807400  | -2.64181600 | -0.69228500 |
| H | 3.77825200  | 0.21824600  | 1.43690400  |
| H | 2.53304100  | -1.18850500 | -2.45250700 |
| H | -0.71601200 | -2.92535400 | -2.19532700 |
| H | 0.10140900  | -2.79158100 | 2.01856000  |
| H | 2.83359900  | -4.79698800 | -0.63886500 |
| H | -4.77013500 | 0.64320300  | 1.65265400  |
| H | -3.97533100 | 0.04364000  | -2.52698300 |
| H | -6.73539900 | 3.10123500  | -1.28182500 |
| H | -1.64639800 | 0.28863100  | 4.76233400  |
| H | -1.43538900 | 1.70256200  | 0.71160800  |
| H | 1.80962900  | -0.60769900 | 2.38126700  |
| H | 2.02029500  | 2.77175100  | 1.74627100  |
| H | 1.84933900  | 2.83829400  | -2.56424700 |
| H | 3.44809200  | 6.19454000  | -0.41786900 |

**Cartesian coordinates, electronic energies ( $E_{\text{elec}}$ ), thermal corrections to enthalpies ( $H_{\text{corr}}$ ) and Gibbs ( $G_{\text{corr}}$ ) energies and single-point energies (SPE) for TS4-9 (triplet) in Solvent = THF**

**TS4\_T**

$E_{\text{elec}}$  (M06/BS1) = -680.44128457 au

$H_{\text{corr}}$  (M06/BS1) = 0.265015 au

$G_{\text{corr}}$  (M06/BS1) = 0.197618 au

SPE (M06/BS2//M06/BS1) = -680.07545209 au

0 3

|   |             |             |             |
|---|-------------|-------------|-------------|
| C | -4.46659000 | 0.44145800  | -0.20189700 |
| C | -3.57933600 | 1.42026700  | -0.50434100 |
| C | -2.43133600 | -0.34559100 | 0.19183300  |
| N | -3.74061700 | -0.64939400 | 0.23505600  |
| H | -5.54605500 | 0.41895700  | -0.24990700 |
| H | -3.72648000 | 2.42637700  | -0.87112800 |
| N | -2.31545800 | 0.91670900  | -0.26185800 |
| C | -4.30059300 | -1.91748100 | 0.67834600  |
| H | -4.77933900 | -2.42537500 | -0.16436500 |
| H | -3.49127900 | -2.54073300 | 1.06654600  |
| H | -5.03435800 | -1.73258100 | 1.46761200  |
| C | -1.05237200 | 1.59298200  | -0.52648100 |
| H | -0.34140600 | 0.86823800  | -0.93718100 |
| H | -1.23173100 | 2.38148400  | -1.26054000 |
| H | -0.64491400 | 2.02188400  | 0.39257700  |
| N | -1.41071400 | -1.21126700 | 0.46022400  |
| N | -0.52210700 | -0.76216600 | 1.36593600  |
| O | 0.43147800  | -1.53761700 | 1.46055700  |
| V | -0.66149600 | -2.75252800 | -0.68351600 |
| C | -2.14696100 | -2.76301200 | -2.12283500 |
| C | -0.57268900 | -4.61746300 | 0.17626700  |
| C | 0.99874400  | -2.16205400 | -1.74781200 |
| H | -1.90641300 | -3.44279600 | -2.95710900 |
| H | -3.12651400 | -3.06843700 | -1.71433300 |
| H | -2.26594400 | -1.74692200 | -2.54561100 |
| H | -0.30698600 | -5.35785900 | -0.59862800 |
| H | 0.16156700  | -4.68648600 | 0.99403600  |
| H | -1.56481600 | -4.89435500 | 0.57436800  |
| H | 1.22521300  | -2.93687300 | -2.50157800 |
| H | 0.76885000  | -1.23094900 | -2.29582900 |
| H | 1.89628900  | -1.99315300 | -1.13376000 |

## TS5\_T

$E_{\text{elec}}(\text{M06/BS1}) = -680.45058139 \text{ au}$

$H_{\text{corr}}(\text{M06/BS1}) = 0.264835 \text{ au}$

$G_{\text{corr}}(\text{M06/BS1}) = 0.198458 \text{ au}$

$\text{SPE}(\text{M06/BS2//M06/BS1}) = -680.07936615 \text{ au}$

0 3

|   |             |             |             |
|---|-------------|-------------|-------------|
| O | -0.50278500 | -1.29966200 | 0.17768900  |
| N | -0.05610600 | 0.40960400  | 3.91145600  |
| N | 2.03098400  | -0.21727400 | 3.71699900  |
| N | 0.69007500  | -0.71898200 | 1.84931300  |
| N | -0.56797700 | -0.86469300 | 1.43278200  |
| C | 0.83085900  | -0.20408500 | 3.07372600  |
| C | 0.61117100  | 0.78116100  | 5.07190900  |
| H | 0.09392000  | 1.28435000  | 5.87699700  |
| C | 1.89928100  | 0.39747600  | 4.94969000  |
| H | 2.73860900  | 0.49329300  | 5.62392700  |
| C | -1.45587600 | 0.71078200  | 3.65006400  |
| H | -1.81413300 | 1.34934100  | 4.46193700  |
| H | -1.55919300 | 1.23960500  | 2.69899900  |
| H | -2.05224500 | -0.20405700 | 3.61011700  |
| C | 3.25339900  | -0.77753100 | 3.17668200  |
| H | 3.00922600  | -1.64239600 | 2.55380500  |
| H | 3.78867400  | -0.03715000 | 2.57141500  |
| H | 3.89011900  | -1.09280400 | 4.00769800  |
| V | 1.15842700  | -1.29818900 | -0.63946600 |
| C | 0.78999300  | -1.38260300 | -2.62567000 |
| H | 1.68123500  | -1.67726200 | -3.19930000 |
| H | 0.01630400  | -2.15962700 | -2.74552000 |
| H | 0.39691400  | -0.43018200 | -3.01315700 |
| C | 2.62207500  | 0.11779600  | -0.57382600 |
| H | 3.32648500  | -0.07899800 | -1.39798400 |
| H | 2.19040000  | 1.12254400  | -0.70416900 |
| H | 3.16253400  | 0.07897200  | 0.38113800  |
| C | 1.92908300  | -3.14634300 | -0.28975800 |
| H | 2.03138400  | -3.38633100 | 0.77780900  |
| H | 1.32426500  | -3.92363000 | -0.78064700 |
| H | 2.92946200  | -3.13276800 | -0.75530100 |

## TS6\_T

$E_{\text{elec}}(\text{M06/BS1}) = -680.43944178 \text{ au}$

$H_{\text{corr}}(\text{M06/BS1}) = 0.244841 \text{ au}$

$G_{\text{corr}}(\text{M06/BS1}) = 0.194116 \text{ au}$

$\text{SPE}(\text{M06/BS2//M06/BS1}) = -680.06943954 \text{ au}$

0 3

|   |             |             |             |
|---|-------------|-------------|-------------|
| C | 4.42396400  | 0.56382400  | 0.04846300  |
| C | 4.30259600  | -0.78155500 | 0.04543300  |
| C | 2.23685100  | 0.07831000  | -0.03058000 |
| N | 3.14804500  | 1.09186100  | 0.00114400  |
| H | 5.29838900  | 1.19845800  | 0.07818600  |
| H | 5.05089800  | -1.56136400 | 0.07448900  |
| N | 2.94972300  | -1.08879400 | -0.00345900 |
| C | 2.79150000  | 2.49618800  | -0.00767900 |
| H | 2.21464500  | 2.73579700  | -0.90666000 |
| H | 2.18984200  | 2.74174000  | 0.87350500  |
| H | 3.71202500  | 3.08454100  | 0.00310700  |
| C | 2.43151600  | -2.44806400 | -0.02083500 |
| H | 1.84681400  | -2.62797800 | -0.92652900 |
| H | 3.28788400  | -3.12744900 | 0.00126100  |
| H | 1.79745800  | -2.63269500 | 0.85008100  |
| N | 0.93149700  | 0.35321600  | -0.07642500 |
| N | 0.15119000  | -0.71047100 | -0.10129900 |
| O | -1.10187900 | -0.32978800 | -0.15103300 |
| V | -2.84465600 | 0.04210800  | -0.15573600 |
| C | -4.12562900 | -1.40417700 | -0.78381400 |
| H | -5.14634500 | -1.13545300 | -0.46627400 |
| H | -4.10663800 | -1.51584900 | -1.87952800 |
| H | -3.86179400 | -2.36779500 | -0.32257500 |
| C | -3.47964500 | 1.88323600  | -0.74101300 |
| H | -4.52454900 | 2.01645100  | -0.41643200 |
| H | -2.86470900 | 2.65972900  | -0.26162500 |
| H | -3.42274600 | 2.00765100  | -1.83395200 |
| C | -3.19875100 | 0.08112200  | 1.84601300  |
| H | -4.27928700 | 0.27267900  | 1.95319000  |
| H | -2.95892400 | -0.88005500 | 2.32412900  |
| H | -2.64147000 | 0.88847700  | 2.34350000  |

## TS7\_T

$E_{\text{elec}}(\text{M06/BS1}) = -680.44630794 \text{ au}$

$H_{\text{corr}}(\text{M06/BS1}) = 0.265013 \text{ au}$

$G_{\text{corr}}(\text{M06/BS1}) = 0.198443 \text{ au}$

$\text{SPE}(\text{M06/BS2//M06/BS1}) = -680.07307168 \text{ au}$

0 3

|   |             |             |             |
|---|-------------|-------------|-------------|
| C | -4.08705800 | -0.39438200 | 0.31071900  |
| C | -4.01854500 | 0.93782900  | 0.53205100  |
| C | -2.05076100 | 0.29566400  | -0.31841200 |
| N | -2.87127400 | -0.78768300 | -0.21057000 |
| H | -4.88673900 | -1.10232000 | 0.47654500  |
| H | -4.74751300 | 1.62843100  | 0.93283800  |
| N | -2.75929400 | 1.37105400  | 0.14571000  |
| C | -2.49326700 | -2.12931400 | -0.60909700 |
| H | -2.27594300 | -2.16087800 | -1.68168200 |
| H | -1.60430000 | -2.45024700 | -0.05739800 |
| H | -3.32543900 | -2.80067200 | -0.38487700 |
| C | -2.31399600 | 2.75343500  | 0.25338000  |
| H | -2.10264000 | 3.17329300  | -0.73486200 |
| H | -3.11877600 | 3.32287000  | 0.72622200  |
| H | -1.41049800 | 2.81976000  | 0.86421600  |
| N | -0.81865700 | 0.16086200  | -0.81081900 |
| N | -0.12185100 | 1.28392500  | -0.85419800 |
| O | 1.08754200  | 1.03669900  | -1.46304400 |
| V | 0.50922500  | 2.09941100  | -2.82611000 |
| C | -1.25080000 | 1.81588500  | -3.78780600 |
| H | -1.28681000 | 2.38854800  | -4.72715400 |
| H | -1.36799600 | 0.74216900  | -4.00387000 |
| H | -2.07997100 | 2.13422800  | -3.13664100 |
| C | 2.01640000  | 2.12989200  | -4.19942500 |
| H | 1.83317000  | 2.94742100  | -4.91496000 |
| H | 2.96456000  | 2.33734400  | -3.67985100 |
| H | 2.10538400  | 1.17652000  | -4.74311600 |
| C | 0.69508600  | 4.03692200  | -2.25847100 |
| H | 0.14340700  | 4.59286800  | -3.03649000 |
| H | 0.23797200  | 4.23180800  | -1.27791700 |
| H | 1.74019400  | 4.37633000  | -2.26417200 |



## TS8\_T

$E_{\text{elec}}(\text{M06/BS1}) = -680.44782567 \text{ au}$

$H_{\text{corr}}(\text{M06/BS1}) = 0.265203 \text{ au}$

$G_{\text{corr}}(\text{M06/BS1}) = 0.199707 \text{ au}$

$\text{SPE}(\text{M06/BS2//M06/BS1}) = -680.07659021 \text{ au}$

0 3

|   |             |             |             |
|---|-------------|-------------|-------------|
| C | -4.21003900 | -0.08748500 | 0.50686200  |
| C | -4.02161800 | 1.20560200  | 0.15176800  |
| C | -2.07055000 | 0.15285000  | -0.08482900 |
| N | -3.00131500 | -0.73213500 | 0.35845000  |
| H | -5.09254400 | -0.60826300 | 0.85081900  |
| H | -4.70773200 | 2.04061200  | 0.12472500  |
| N | -2.69467900 | 1.35718500  | -0.21419100 |
| C | -2.73071700 | -2.13890300 | 0.60101400  |
| H | -2.43637500 | -2.63086000 | -0.33123600 |
| H | -1.92241800 | -2.24698500 | 1.33083400  |
| H | -3.64165400 | -2.59929700 | 0.98956000  |
| C | -2.12846000 | 2.60614800  | -0.70975900 |
| H | -1.68233200 | 2.45463000  | -1.69535600 |
| H | -2.94350200 | 3.33072000  | -0.78204300 |
| H | -1.36136200 | 2.97808100  | -0.02600200 |
| N | -0.81255800 | -0.25717300 | -0.31679100 |
| N | 0.03737500  | 0.71905300  | -0.63981400 |
| O | 1.28387300  | 0.18711400  | -0.74196400 |
| V | 1.19148300  | 0.33187200  | 1.12933900  |
| C | 0.47782800  | 2.02230600  | 2.03065600  |
| H | 0.89235000  | 2.06772200  | 3.05081100  |
| H | 0.81157000  | 2.91700100  | 1.48188500  |
| H | -0.62348200 | 2.02353600  | 2.08943500  |
| C | 3.15614700  | 0.73323300  | 1.47853400  |
| H | 3.30334100  | 0.85388200  | 2.56302500  |
| H | 3.80540200  | -0.07483400 | 1.10743000  |
| H | 3.42868600  | 1.67552000  | 0.98019900  |
| C | 0.83156700  | -1.21748000 | 2.39576900  |
| H | 1.46025800  | -1.12718600 | 3.29457500  |
| H | -0.22737200 | -1.19473900 | 2.69989100  |
| H | 1.04191200  | -2.17685500 | 1.89922400  |

## TS9\_T

$E_{\text{elec}}(\text{M06/BS1}) = -680.42839143 \text{ au}$

$H_{\text{corr}}(\text{M06/BS1}) = 0.265411 \text{ au}$

$G_{\text{corr}}(\text{M06/BS1}) = 0.200626 \text{ au}$

$\text{SPE}(\text{M06/BS2//M06/BS1}) = -680.05975005 \text{ au}$

0 3

|   |             |             |             |
|---|-------------|-------------|-------------|
| C | -4.74855200 | 0.51350200  | -1.01857100 |
| C | -4.25899700 | 1.42422900  | -0.15043800 |
| C | -3.01216800 | -0.42363000 | 0.04047900  |
| N | -3.97140400 | -0.62524800 | -0.90001500 |
| H | -5.57107800 | 0.56657600  | -1.71774300 |
| H | -4.56503500 | 2.43845200  | 0.06486600  |
| N | -3.17598600 | 0.84749900  | 0.50396600  |
| C | -4.14745900 | -1.87730700 | -1.61009900 |
| H | -4.34309000 | -2.68999800 | -0.90135100 |
| H | -4.99704900 | -1.77172000 | -2.28844600 |
| H | -3.24720000 | -2.11859100 | -2.18375800 |
| C | -2.36116500 | 1.54969600  | 1.48489100  |
| H | -1.30136400 | 1.36100300  | 1.29925400  |
| H | -2.56122000 | 2.61955400  | 1.37963600  |
| H | -2.60729100 | 1.23177900  | 2.50391200  |
| N | -2.13425200 | -1.39763700 | 0.33500300  |
| N | -1.46532800 | -1.19027600 | 1.52557200  |
| O | -0.52085500 | -2.03063700 | 1.71478700  |
| V | -2.78247000 | -2.21894300 | 2.54707900  |
| C | -2.85424800 | -4.20784500 | 2.19933000  |
| H | -3.55098000 | -4.72723800 | 2.87279000  |
| H | -3.13237300 | -4.39425500 | 1.15105500  |
| H | -1.82849800 | -4.57113300 | 2.36788300  |
| C | -4.76743700 | -1.81320000 | 2.42565700  |
| H | -5.33375400 | -2.29890900 | 3.23355700  |
| H | -4.83897600 | -0.71648600 | 2.55328600  |
| H | -5.21611700 | -2.07790700 | 1.45627800  |
| C | -2.39136800 | -1.89416800 | 4.50196800  |
| H | -3.07379300 | -2.56814200 | 5.04521300  |
| H | -1.35366300 | -2.12453700 | 4.77944200  |
| H | -2.63235000 | -0.85355400 | 4.77198400  |

**Cartesian coordinates, electronic energies ( $E_{\text{elec}}$ ), thermal corrections to enthalpies ( $H_{\text{corr}}$ ) and Gibbs ( $G_{\text{corr}}$ ) energies and single-point energies (SPE) for TSB6-8 (triplet) in Solvent = THF**

**TSB6\_T**

$E_{\text{elec}}$  (M06/BS1) = -680.42100767 au

$H_{\text{corr}}$  (M06/BS1) = 0.264482 au

$G_{\text{corr}}$  (M06/BS1) = 0.196041 au

SPE (M06/BS2//M06/BS1) = -680.04584812 au

0 3

|   |             |             |             |
|---|-------------|-------------|-------------|
| C | -3.16854700 | 1.34528100  | -0.04026400 |
| C | -3.61664100 | 0.13090800  | -0.42989300 |
| C | -1.50933400 | -0.11686300 | 0.25270100  |
| N | -1.86110400 | 1.18719200  | 0.38499400  |
| H | -3.65574500 | 2.30982400  | -0.01890100 |
| H | -4.57459000 | -0.18050700 | -0.82243600 |
| N | -2.58686000 | -0.78009500 | -0.24512200 |
| C | -1.00470000 | 2.21066900  | 0.95619900  |
| H | -0.51533000 | 1.81481300  | 1.85191700  |
| H | -0.23734500 | 2.52272700  | 0.23870100  |
| H | -1.62374000 | 3.06968500  | 1.22535700  |
| C | -2.64457600 | -2.19009700 | -0.60275000 |
| H | -1.82434700 | -2.44320000 | -1.28035700 |
| H | -2.57832700 | -2.81816800 | 0.28984800  |
| H | -3.59810100 | -2.36720600 | -1.10638100 |
| N | -0.29331600 | -0.56625200 | 0.59551300  |
| N | -0.09811400 | -1.84206400 | 0.72175700  |
| O | 1.65340100  | -1.84265900 | 0.29586800  |
| V | 1.97701500  | -0.19240500 | 0.12107200  |
| C | 2.28707700  | 0.74985300  | 1.89750400  |
| H | 2.29975300  | 1.82428900  | 1.64297900  |
| H | 1.49740700  | 0.56518900  | 2.63813800  |
| H | 3.26158700  | 0.47482800  | 2.32698800  |
| C | 1.30536000  | 0.88377200  | -1.51595000 |
| H | 1.69088400  | 0.45045200  | -2.44941000 |
| H | 0.21169500  | 0.96389000  | -1.59116600 |
| H | 1.73545800  | 1.89496900  | -1.41335100 |
| C | 3.83862300  | -0.13388800 | -0.68042300 |
| H | 4.19873900  | 0.89751900  | -0.80685400 |
| H | 4.45266800  | -0.64124700 | 0.08442800  |
| H | 3.93046100  | -0.68000900 | -1.62839600 |

## TSB7\_T

$E_{\text{elec}}(\text{M06/BS1}) = -680.42853236 \text{ au}$

$H_{\text{corr}}(\text{M06/BS1}) = 0.264006 \text{ au}$

$G_{\text{corr}}(\text{M06/BS1}) = 0.196397 \text{ au}$

$\text{SPE}(\text{M06/BS2//M06/BS1}) = -680.05372917 \text{ au}$

0 3

|   |             |             |             |
|---|-------------|-------------|-------------|
| C | -3.75345000 | 0.78777700  | -0.45225000 |
| C | -3.44489300 | 1.49887300  | 0.65702900  |
| C | -2.01542100 | -0.21355300 | 0.53263500  |
| N | -2.86939100 | -0.27059000 | -0.52720900 |
| H | -4.52429900 | 0.93390000  | -1.19585600 |
| H | -3.89148300 | 2.39129900  | 1.07326200  |
| N | -2.37195000 | 0.87616100  | 1.27588700  |
| C | -2.80090000 | -1.28596700 | -1.55874500 |
| H | -1.82978800 | -1.24489700 | -2.06372400 |
| H | -2.93156600 | -2.28027600 | -1.11968900 |
| H | -3.59722700 | -1.09843900 | -2.28260700 |
| C | -1.70536400 | 1.35502400  | 2.47505200  |
| H | -0.71655000 | 1.76215200  | 2.23555800  |
| H | -2.32389800 | 2.14246400  | 2.91349200  |
| H | -1.58875600 | 0.54031000  | 3.19448300  |
| N | -1.08263900 | -1.14412200 | 0.73014400  |
| N | -0.30497300 | -1.08672700 | 1.72795700  |
| O | 1.12119700  | -2.03744800 | 1.21348500  |
| V | 2.30348100  | -0.86993100 | 0.99819600  |
| C | 1.69290100  | 0.44350200  | -0.42698800 |
| H | 2.53886100  | 1.12149100  | -0.62573000 |
| H | 1.40313800  | -0.05985600 | -1.36124600 |
| H | 0.84076000  | 1.03549900  | -0.05828800 |
| C | 4.09668000  | -1.56904400 | 0.37449800  |
| H | 4.82865300  | -0.75365700 | 0.26995100  |
| H | 4.47369700  | -2.31064900 | 1.09478500  |
| H | 3.96041200  | -2.06349900 | -0.59981000 |
| C | 2.65690500  | 0.07263100  | 2.75906200  |
| H | 1.72637800  | 0.51740700  | 3.14109300  |
| H | 3.06698700  | -0.61155900 | 3.51683300  |
| H | 3.38760500  | 0.87285900  | 2.55837800  |

## TSB8\_T

$E_{\text{elec}}(\text{M06/BS1}) = -680.42820879 \text{ au}$

$H_{\text{corr}}(\text{M06/BS1}) = 0.263961 \text{ au}$

$G_{\text{corr}}(\text{M06/BS1}) = 0.195267 \text{ au}$

$\text{SPE}(\text{M06/BS2//M06/BS1}) = -680.05373333 \text{ au}$

0 3

|   |             |             |             |
|---|-------------|-------------|-------------|
| C | -4.42233500 | -0.71909900 | 0.10999400  |
| C | -4.33193600 | 0.59328700  | 0.42563200  |
| C | -2.30045300 | -0.09221100 | -0.19970700 |
| N | -3.16510400 | -1.13992400 | -0.27839300 |
| H | -5.26646400 | -1.39392000 | 0.12060700  |
| H | -5.07974900 | 1.29177900  | 0.77498700  |
| N | -3.01860100 | 0.98915600  | 0.22419700  |
| C | -2.77641300 | -2.47318300 | -0.69477700 |
| H | -2.32753100 | -2.43799500 | -1.69241000 |
| H | -2.04884600 | -2.89272600 | 0.00799100  |
| H | -3.66910100 | -3.10241200 | -0.71618700 |
| C | -2.50187800 | 2.32194700  | 0.49056500  |
| H | -1.96293400 | 2.70310300  | -0.38067800 |
| H | -3.35220800 | 2.97392500  | 0.70619000  |
| H | -1.82578300 | 2.31322000  | 1.35330700  |
| N | -1.01654700 | -0.21944700 | -0.54355100 |
| N | -0.24971500 | 0.79024700  | -0.53560700 |
| O | 1.36754900  | 0.10589100  | -0.21877500 |
| V | 1.67697400  | 0.71052400  | 1.31713900  |
| C | 1.77338800  | 2.73557900  | 1.23409900  |
| H | 2.65486500  | 3.07321700  | 0.66825200  |
| H | 0.86686600  | 3.14737300  | 0.76815500  |
| H | 1.84761400  | 3.09955200  | 2.27174700  |
| C | 3.42373400  | 0.13331700  | 2.16006400  |
| H | 3.54965300  | 0.58138300  | 3.15762800  |
| H | 3.43251600  | -0.96394400 | 2.24861400  |
| H | 4.25956900  | 0.43957600  | 1.51280000  |
| C | 0.24460000  | 0.06115400  | 2.60806800  |
| H | 0.54968200  | 0.39063800  | 3.61462100  |
| H | -0.73644300 | 0.50167900  | 2.37278600  |
| H | 0.15576800  | -1.03550200 | 2.59932100  |

**Cartesian coordinates, electronic energies ( $E_{\text{elec}}$ ), thermal corrections to enthalpies ( $H_{\text{corr}}$ ) and Gibbs ( $G_{\text{corr}}$ ) energies and single-point energies (SPE) for 4, 6-9, 7i-9i, 8p, 9p, 8ip & 9ip (singlet) in Solvent = THF**

**4\_S ( $\eta^{\square}$ -N1)**

$E_{\text{elec}}$  (M06/BS1) = -680.40104237 au

$H_{\text{corr}}$  (M06/BS1) = 0.265296 au

$G_{\text{corr}}$  (M06/BS1) = 0.198231 au

SPE (M06/BS2//M06/BS1) = -680.03272459 au

0 1

|   |             |             |             |
|---|-------------|-------------|-------------|
| C | -4.40601600 | 0.12806500  | -0.16926300 |
| C | -3.59141400 | 1.06954700  | -0.70416500 |
| C | -2.30236900 | -0.49571900 | 0.21996400  |
| N | -3.60149100 | -0.82483000 | 0.42885200  |
| H | -5.48422200 | 0.05531300  | -0.14237300 |
| H | -3.81768400 | 1.98432000  | -1.23419900 |
| N | -2.28914000 | 0.69188800  | -0.43668000 |
| C | -4.05370700 | -2.04514500 | 1.07074300  |
| H | -4.16506900 | -2.84940700 | 0.33326800  |
| H | -3.32275600 | -2.34822200 | 1.82455400  |
| H | -5.01539500 | -1.85537800 | 1.55412200  |
| C | -1.07874900 | 1.37879800  | -0.84040300 |
| H | -0.51334700 | 0.76132500  | -1.55012900 |
| H | -1.35646600 | 2.31987700  | -1.31963600 |
| H | -0.45170400 | 1.58515900  | 0.03249000  |
| N | -1.21230800 | -1.24347700 | 0.57085600  |
| N | -0.62399700 | -0.91399500 | 1.75968400  |
| O | 0.38930300  | -1.55134200 | 1.99017600  |
| V | -0.77809600 | -2.50542100 | -0.86685900 |
| C | -2.20431200 | -2.39360800 | -2.31738200 |
| C | -0.97961500 | -4.34610900 | -0.06378200 |
| C | 1.03677800  | -2.02079400 | -1.62431200 |
| H | -2.11588700 | -3.20549600 | -3.06071900 |
| H | -3.26553300 | -2.28331900 | -2.04268200 |
| H | -1.88499500 | -1.45471000 | -2.81378900 |
| H | -0.81475400 | -5.15456100 | -0.79402900 |
| H | -0.11586700 | -4.31087200 | 0.62816400  |
| H | -1.88840000 | -4.56439000 | 0.51974100  |
| H | 1.22238800  | -2.78682300 | -2.39813500 |
| H | 1.08486400  | -1.02583000 | -2.09982200 |
| H | 1.82799900  | -2.09196300 | -0.86120900 |

## 6\_S ( $\eta^{\square}$ -O<sub>syn</sub>)

E<sub>elec</sub> (M06/BS1) = -680.42287957 au

H<sub>corr</sub> (M06/BS1) = 0.265870 au

G<sub>corr</sub> (M06/BS1) = 0.199613 au

SPE (M06/BS2//M06/BS1) = -680.05224005 au

0 1

|   |             |             |             |
|---|-------------|-------------|-------------|
| C | -4.41931000 | 0.64721600  | -0.68181700 |
| C | -3.80076900 | 1.62342800  | 0.01321600  |
| C | -2.31877000 | -0.04624100 | -0.25861700 |
| N | -3.50799400 | -0.38231500 | -0.84992600 |
| H | -5.42385600 | 0.58130700  | -1.07587100 |
| H | -4.15609600 | 2.58659700  | 0.35284500  |
| N | -2.49988700 | 1.20449900  | 0.28040500  |
| C | -3.72511300 | -1.63429900 | -1.53607300 |
| H | -3.02245100 | -1.73889400 | -2.37129800 |
| H | -3.57613600 | -2.47712800 | -0.85073500 |
| H | -4.74967500 | -1.64976500 | -1.91634700 |
| C | -1.53380200 | 1.99591000  | 1.02208200  |
| H | -0.66686400 | 2.24138700  | 0.40211700  |
| H | -2.03022300 | 2.92070300  | 1.33044800  |
| H | -1.18807300 | 1.45806200  | 1.90885900  |
| N | -1.29569900 | -0.88396000 | -0.29399100 |
| N | -0.17732400 | -0.44245300 | 0.31293500  |
| O | 0.74745300  | -1.34674400 | 0.20721900  |
| V | 1.17296000  | -2.94803800 | -0.41030800 |
| C | 2.80736600  | -2.69864500 | -1.54111600 |
| H | 3.24000200  | -3.66899700 | -1.83004300 |
| H | 2.38168000  | -2.21502700 | -2.43878100 |
| H | 3.58384300  | -2.04737400 | -1.11825500 |
| C | -0.24790900 | -3.92216400 | -1.42139200 |
| H | 0.21876700  | -4.87123800 | -1.73719800 |
| H | -1.12959700 | -4.13158200 | -0.79505200 |
| H | -0.56264200 | -3.34923900 | -2.30862400 |
| C | 1.82946100  | -4.00536900 | 1.15836900  |
| H | 2.27170000  | -4.95914900 | 0.83124400  |
| H | 2.51932900  | -3.47796200 | 1.83066600  |
| H | 0.88798100  | -4.21243800 | 1.69818000  |

## 7\_S ( $\eta^{\square}$ -O<sub>anti</sub>)

E<sub>elec</sub> (M06/BS1) = -680.42045295 au

H<sub>corr</sub> (M06/BS1) = 0.265656 au

G<sub>corr</sub> (M06/BS1) = 0.196400 au

SPE (M06/BS2//M06/BS1) = -680.04949413 au

0 1

|   |             |             |             |
|---|-------------|-------------|-------------|
| C | -4.36420900 | -0.31108300 | -0.39455000 |
| C | -4.16619000 | 1.00548800  | -0.18039200 |
| C | -2.19841900 | -0.03295500 | 0.16381900  |
| N | -3.15514600 | -0.95280700 | -0.18205400 |
| H | -5.25199600 | -0.86003700 | -0.67639200 |
| H | -4.84637800 | 1.84402200  | -0.23908400 |
| N | -2.82969300 | 1.18961000  | 0.16551000  |
| C | -2.89103800 | -2.36797100 | -0.29900800 |
| H | -2.13668100 | -2.55572200 | -1.07166200 |
| H | -2.52178200 | -2.76897100 | 0.65177500  |
| H | -3.82144500 | -2.87370700 | -0.56985300 |
| C | -2.24322300 | 2.48618000  | 0.45455000  |
| H | -1.42516800 | 2.70739700  | -0.23682700 |
| H | -3.02809900 | 3.23944600  | 0.33865900  |
| H | -1.85415600 | 2.52225700  | 1.47603700  |
| N | -0.95965100 | -0.41447000 | 0.41292200  |
| N | -0.12793900 | 0.58375300  | 0.76442900  |
| O | 1.05530900  | 0.08988700  | 0.96940900  |
| V | 2.70623400  | -0.25462000 | 1.32823600  |
| C | 3.61433100  | 1.45066800  | 1.86534300  |
| H | 4.64783500  | 1.11772700  | 2.07056300  |
| H | 3.63142500  | 2.20702800  | 1.06729200  |
| H | 3.19000500  | 1.88850600  | 2.78074900  |
| C | 3.53207500  | -1.06808800 | -0.30862000 |
| H | 4.55548500  | -1.40826100 | -0.08054900 |
| H | 2.96127500  | -1.88073900 | -0.77708900 |
| H | 3.58853500  | -0.21713200 | -1.00913900 |
| C | 2.74772700  | -1.63689500 | 2.78148000  |
| H | 3.79056600  | -1.94108300 | 2.96933100  |
| H | 2.36877700  | -1.09685800 | 3.66577100  |
| H | 2.12354300  | -2.52355400 | 2.60769700  |



## 8\_S ( $\eta^2$ -N<sub>2</sub>,O)

E<sub>elec</sub> (M06/BS1) = -680.46445013 au

H<sub>corr</sub> (M06/BS1) = 0.266855 au

G<sub>corr</sub> (M06/BS1) = 0.201574 au

SPE (M06/BS2//M06/BS1) = -680.09025100 au

0 1

|   |             |            |             |
|---|-------------|------------|-------------|
| O | 1.31767700  | 3.01636500 | 4.96872700  |
| N | -1.50947800 | 1.53099700 | 7.67807700  |
| N | -0.45310600 | 2.73892600 | 9.17190400  |
| N | 0.45294100  | 2.88912000 | 7.02542200  |
| N | 0.18750100  | 2.64560200 | 5.69806300  |
| C | -0.45439200 | 2.39513700 | 7.84603500  |
| C | -2.13840000 | 1.34373900 | 8.90904100  |
| H | -2.99136200 | 0.68583300 | 9.00225300  |
| C | -1.49097300 | 2.08994000 | 9.82497200  |
| H | -1.66527000 | 2.22840700 | 10.88297800 |
| C | -1.86437900 | 0.79922500 | 6.47519500  |
| H | -2.17903400 | 1.47898500 | 5.67707700  |
| H | -1.01794400 | 0.20655200 | 6.11529000  |
| H | -2.69155400 | 0.12875300 | 6.72612300  |
| C | 0.45314000  | 3.71490600 | 9.73116700  |
| H | 1.49137200  | 3.37770400 | 9.63906800  |
| H | 0.35023300  | 4.67265000 | 9.20491300  |
| H | 0.20862300  | 3.85175900 | 10.78770600 |
| V | 0.09623200  | 4.27769100 | 4.71170500  |
| C | -1.67797100 | 4.61963100 | 5.63995600  |
| H | -2.36966500 | 3.79821900 | 5.40118400  |
| H | -1.55874900 | 4.69185800 | 6.73021300  |
| H | -2.07433800 | 5.56714000 | 5.24232400  |
| C | 0.91608200  | 6.03883300 | 5.21507200  |
| H | 0.29872300  | 6.85407800 | 4.80942200  |
| H | 1.04592700  | 6.15680100 | 6.29819800  |
| H | 1.90157500  | 6.04247400 | 4.72111000  |
| C | -0.39875000 | 4.24708900 | 2.77379700  |
| H | -1.00301400 | 5.15239400 | 2.60461400  |
| H | 0.50361300  | 4.28417600 | 2.14719500  |
| H | -0.98945600 | 3.35412800 | 2.52577000  |

**9\_S** ( $\eta^3$ -N1,N2,O)

$E_{\text{elec}}$  (M06/BS1) = -680.47185721 au

$H_{\text{corr}}$  (M06/BS1) = 0.267709 au

$G_{\text{corr}}$  (M06/BS1) = 0.205724 au

SPE (M06/BS2//M06/BS1) = -680.09673253 au

0 1

|   |             |             |             |
|---|-------------|-------------|-------------|
| C | -4.45270500 | 0.89417600  | -0.60405700 |
| C | -3.60617800 | 1.79456600  | -0.06315800 |
| C | -2.64091000 | -0.21475500 | 0.10100600  |
| N | -3.84928500 | -0.34758200 | -0.50453800 |
| H | -5.42763000 | 1.01184200  | -1.05559500 |
| H | -3.68578300 | 2.86626400  | 0.05301900  |
| N | -2.48193800 | 1.10800800  | 0.38094200  |
| C | -4.37797400 | -1.58706700 | -1.04679800 |
| H | -3.54681000 | -2.27753400 | -1.20939100 |
| H | -5.09314000 | -2.04196500 | -0.35433100 |
| H | -4.87269500 | -1.37256300 | -1.99848000 |
| C | -1.33346800 | 1.76768600  | 0.99337600  |
| H | -0.45447900 | 1.69211500  | 0.34902700  |
| H | -1.59670800 | 2.81959500  | 1.13095800  |
| H | -1.10313800 | 1.31845400  | 1.96221000  |
| N | -1.83124500 | -1.27383800 | 0.28017300  |
| N | -0.59276900 | -0.98678100 | 0.91836700  |
| O | -0.01761400 | -2.23484300 | 1.00565400  |
| V | -1.52579600 | -2.14028600 | 2.08644800  |
| C | -0.93506400 | -4.00043700 | 2.69579600  |
| H | -1.54457100 | -4.30030900 | 3.56165700  |
| H | -1.12692900 | -4.69429900 | 1.86509900  |
| H | 0.13297800  | -4.02092100 | 2.94730600  |
| C | -3.47516300 | -2.78273600 | 2.06481800  |
| H | -3.67968500 | -3.18819500 | 3.06875300  |
| H | -4.20091800 | -1.98615900 | 1.84016400  |
| H | -3.59219000 | -3.59385900 | 1.33168500  |
| C | -1.37964400 | -1.01962100 | 3.74848100  |
| H | -1.69819300 | -1.61447400 | 4.61778000  |
| H | -0.36335600 | -0.63391600 | 3.89964100  |
| H | -2.08111800 | -0.17830000 | 3.61539100  |

7i\_S ( $\eta^{\square}$ -O<sub>anti</sub>)

E<sub>elec</sub> (M06/BS1) = -680.40804987 au

H<sub>corr</sub> (M06/BS1) = 0.265512 au

G<sub>corr</sub> (M06/BS1) = 0.198639 au

SPE (M06/BS2//M06/BS1) = -680.03767883 au

0 1

|   |             |             |             |
|---|-------------|-------------|-------------|
| C | -4.40803300 | -0.12909200 | 0.48758400  |
| C | -4.28167700 | 1.04303700  | -0.16241100 |
| C | -2.20850900 | 0.20820400  | 0.11812700  |
| N | -3.13030100 | -0.64317200 | 0.66637100  |
| H | -5.28151900 | -0.65060900 | 0.85343400  |
| H | -5.02299900 | 1.75812400  | -0.49160100 |
| N | -2.92139200 | 1.26727700  | -0.38645000 |
| C | -2.77076600 | -1.86962100 | 1.33815800  |
| H | -2.35625500 | -2.59745600 | 0.63052400  |
| H | -2.01775000 | -1.66832600 | 2.10909000  |
| H | -3.66716300 | -2.28830500 | 1.80368400  |
| C | -2.41464300 | 2.35166200  | -1.20923800 |
| H | -2.02674300 | 1.97506600  | -2.16213900 |
| H | -3.24699000 | 3.03282000  | -1.40993600 |
| H | -1.62097100 | 2.89644300  | -0.69209100 |
| N | -0.92268000 | -0.07926000 | 0.14590600  |
| N | -0.07502200 | 0.90572100  | -0.32431000 |
| O | 0.09707200  | 1.90593200  | 0.70018700  |
| V | 1.52830200  | 0.87981400  | 0.68444200  |
| C | 1.96158500  | -0.83222400 | -0.30742100 |
| H | 2.93171400  | -1.18920500 | 0.07237300  |
| H | 1.18144600  | -1.58851300 | -0.16407400 |
| H | 2.03890800  | -0.58292500 | -1.37517500 |
| C | 1.81233000  | 0.12964100  | 2.52419700  |
| H | 2.85285800  | -0.21877500 | 2.60231200  |
| H | 1.64600900  | 0.96591300  | 3.22155000  |
| H | 1.11631100  | -0.68711400 | 2.75110500  |
| C | 3.05361400  | 2.04756400  | 0.13744100  |
| H | 3.96939900  | 1.45484600  | 0.28423900  |
| H | 2.96670800  | 2.35249600  | -0.91379900 |
| H | 3.07423900  | 2.93529500  | 0.78577100  |

**8i\_S** ( $\eta^2$ -N<sub>2</sub>,O)

E<sub>elec</sub> (M06/BS1) = -680.45832992 au

H<sub>corr</sub> (M06/BS1) = 0.266493 au

G<sub>corr</sub> (M06/BS1) = 0.200000 au

SPE (M06/BS2//M06/BS1) = -680.03767883 au

0 1

|   |             |             |             |
|---|-------------|-------------|-------------|
| C | -4.46817300 | 0.35521300  | 0.27454000  |
| C | -3.91891700 | 1.46716600  | -0.25727300 |
| C | -2.27578200 | -0.05404800 | -0.03358500 |
| N | -3.45725100 | -0.58082500 | 0.41441700  |
| H | -5.48323600 | 0.14045600  | 0.57873000  |
| H | -4.35898900 | 2.41785600  | -0.52577300 |
| N | -2.56206100 | 1.22410800  | -0.44714100 |
| C | -3.57701400 | -1.91616600 | 0.95612700  |
| H | -2.80985400 | -2.07688600 | 1.72085400  |
| H | -4.56862900 | -2.02431600 | 1.40320200  |
| H | -3.44915300 | -2.66904400 | 0.16991800  |
| C | -1.69690900 | 2.05511200  | -1.26352700 |
| H | -1.03662800 | 1.41697000  | -1.85907400 |
| H | -2.32152200 | 2.64706600  | -1.93877100 |
| H | -1.08490000 | 2.72243600  | -0.64873500 |
| N | -1.18154700 | -0.79773700 | -0.11000200 |
| N | 0.06169400  | -0.31020500 | -0.04114900 |
| O | 0.15062200  | 0.84992600  | 0.58466700  |
| V | 1.20150700  | 1.98108700  | 1.41002300  |
| C | 3.08116800  | 1.37332700  | 1.06845500  |
| H | 3.68964900  | 2.08131900  | 1.65928900  |
| H | 3.26353100  | 0.35170400  | 1.43389000  |
| H | 3.37248100  | 1.44604300  | 0.01004900  |
| C | 0.71705000  | 2.01563600  | 3.35752700  |
| H | 1.36522700  | 2.73129400  | 3.88854900  |
| H | -0.33783100 | 2.24027900  | 3.56840000  |
| H | 0.94554800  | 0.99552900  | 3.70941500  |
| C | 0.90872200  | 3.85424400  | 0.73630500  |
| H | 1.53027100  | 4.56842200  | 1.30001300  |
| H | 1.28011100  | 3.80817500  | -0.30283300 |
| H | -0.13368100 | 4.20671200  | 0.72607300  |

**9i\_S** ( $\eta^3$ -N1,N2,O)

$E_{\text{elec}}$  (M06/BS1) = -680.47054937 au

$H_{\text{corr}}$  (M06/BS1) = 0.268014 au

$G_{\text{corr}}$  (M06/BS1) = 0.205866 au

SPE (M06/BS2//M06/BS1) = -680.09489757 au

0 1

|   |             |             |             |
|---|-------------|-------------|-------------|
| C | -2.28225500 | -2.01899300 | 2.37457900  |
| C | -3.05102100 | -0.98518300 | 1.97787500  |
| C | -1.09307600 | -0.80569200 | 0.91450600  |
| N | -1.07221100 | -1.90911400 | 1.70772500  |
| H | -2.47280600 | -2.82736500 | 3.06630300  |
| H | -4.05774200 | -0.70073400 | 2.25018500  |
| N | -2.31730400 | -0.23273000 | 1.06824400  |
| C | -0.01374400 | -2.90145500 | 1.73097000  |
| H | 0.49716600  | -2.89141900 | 0.76399700  |
| H | 0.71081800  | -2.69332100 | 2.52395900  |
| H | -0.46369900 | -3.88481400 | 1.89413700  |
| C | -2.86729000 | 0.91739700  | 0.35854200  |
| H | -2.85262300 | 0.73949900  | -0.71967900 |
| H | -3.90088900 | 1.04102600  | 0.69035300  |
| H | -2.28856500 | 1.81555100  | 0.58229400  |
| N | -0.07434500 | -0.48768000 | 0.10321900  |
| N | -0.16122600 | 0.66407300  | -0.71850700 |
| O | -0.05414800 | 1.75809400  | 0.16294500  |
| V | 1.47647500  | 0.74488200  | 0.23070000  |
| C | 2.71959500  | 0.75135200  | -1.34345300 |
| H | 3.75169700  | 0.81991000  | -0.96684000 |
| H | 2.57556900  | -0.20061200 | -1.87618500 |
| H | 2.50361800  | 1.59036100  | -2.01717400 |
| C | 2.29478900  | -0.46876000 | 1.67226800  |
| H | 3.29609900  | -0.07864400 | 1.90656800  |
| H | 1.69157700  | -0.45627300 | 2.59218500  |
| H | 2.37778700  | -1.50211900 | 1.30865600  |
| C | 2.18475600  | 2.32737700  | 1.32902800  |
| H | 3.27169300  | 2.20741200  | 1.45062300  |
| H | 1.95752400  | 3.28284500  | 0.83942200  |
| H | 1.71240800  | 2.30322900  | 2.32102600  |

## 8\_S<sub>P</sub> ( $\eta^2$ -N<sub>2</sub>,O)

E<sub>elec</sub> (M06/BS1) = -1638.39215979 au

H<sub>corr</sub> (M06/BS1) = 0.550848 au

G<sub>corr</sub> (M06/BS1) = 0.449997 au

SPE (M06/BS2//M06/BS1) = -1638.27508739 au

0 1

|   |             |             |             |
|---|-------------|-------------|-------------|
| O | 1.38116300  | 0.28657700  | -1.34814600 |
| N | -1.87522100 | -1.62684200 | 0.56317100  |
| N | -3.08214300 | -0.22224300 | -0.62662200 |
| N | -0.76606800 | 0.08610400  | -0.84032200 |
| N | 0.44577600  | -0.56001100 | -0.75023900 |
| C | -1.78066200 | -0.55466200 | -0.30091300 |
| C | -3.22410100 | -1.97728100 | 0.70757900  |
| H | -3.52056700 | -2.77401100 | 1.37493600  |
| C | -3.95649800 | -1.12318800 | -0.02515300 |
| H | -5.02631800 | -1.03180100 | -0.15099000 |
| V | 0.95205600  | -0.94839000 | -2.55149000 |
| C | -0.86084400 | -2.18481800 | 1.39160000  |
| C | 0.06093500  | -1.36610100 | 2.03992700  |
| C | -0.84911000 | -3.56267700 | 1.59428700  |
| C | 1.01434900  | -1.93953100 | 2.87252800  |
| C | 0.10098300  | -4.12614900 | 2.43890500  |
| C | 1.03893100  | -3.31778500 | 3.07449200  |
| H | 1.73770500  | -1.30044600 | 3.37512000  |
| H | 0.11100600  | -5.20359900 | 2.59204900  |
| C | -3.46129300 | 0.73224200  | -1.60675000 |
| C | -3.01845100 | 2.05017500  | -1.51196400 |
| C | -4.29608500 | 0.33746000  | -2.65069500 |
| C | -3.40911400 | 2.97131600  | -2.47685000 |
| C | -4.69162100 | 1.26924100  | -3.60459100 |
| C | -4.24680700 | 2.58588400  | -3.52172000 |
| H | -3.06307400 | 4.00074500  | -2.40550200 |
| H | -5.34264200 | 0.96064400  | -4.42009900 |
| C | 0.29400900  | 0.02480800  | -4.16729800 |
| C | 0.72812300  | -0.39097900 | -5.43827300 |
| C | -0.63504400 | 1.07389800  | -4.08740500 |
| C | 0.23813000  | 0.21738200  | -6.59240500 |
| C | -1.12712100 | 1.68000200  | -5.23892900 |
| C | -0.69075000 | 1.25029400  | -6.49203900 |
| H | 0.58239800  | -0.11548700 | -7.57087200 |
| H | -1.85719900 | 2.48563800  | -5.15514400 |
| C | -0.44424200 | -2.44218700 | -2.46738100 |
| C | -0.10246600 | -3.59040400 | -1.73882600 |
| C | -1.70467600 | -2.40570600 | -3.08424500 |

|   |             |             |             |
|---|-------------|-------------|-------------|
| C | -0.97230800 | -4.67654900 | -1.65074300 |
| C | -2.59023800 | -3.47704900 | -2.97030800 |
| C | -2.22393500 | -4.61699200 | -2.25878300 |
| H | -0.67823300 | -5.56283600 | -1.08749800 |
| H | -3.56871600 | -3.42424600 | -3.44861700 |
| C | 2.71518300  | -1.82865200 | -2.90774300 |
| C | 2.79448800  | -2.91616300 | -3.79693300 |
| C | 3.90397500  | -1.36136400 | -2.32279400 |
| C | 4.01834400  | -3.50970100 | -4.09263000 |
| C | 5.12916800  | -1.95372100 | -2.62093200 |
| C | 5.18709000  | -3.02708800 | -3.50587200 |
| H | 4.06098400  | -4.35257100 | -4.78144100 |
| H | 6.04184200  | -1.57544400 | -2.16184400 |
| H | 6.14450500  | -3.49138500 | -3.73779400 |
| H | 3.87198700  | -0.52194200 | -1.62791100 |
| H | -1.07521200 | 1.72378900  | -7.39452800 |
| H | -2.37209600 | 2.34260800  | -0.68802000 |
| H | -0.98251000 | 1.40613200  | -3.10678500 |
| H | -4.55496400 | 3.31370800  | -4.27022200 |
| H | 1.45475100  | -1.19926600 | -5.53795400 |
| H | -2.01267700 | -1.52429600 | -3.65178800 |
| H | 0.85368900  | -3.64001800 | -1.21066100 |
| H | -2.91279000 | -5.45698800 | -2.17830300 |
| H | -4.62362100 | -0.69966900 | -2.71385900 |
| H | 0.02806000  | -0.28949900 | 1.89065700  |
| H | -1.57004800 | -4.18717100 | 1.06942900  |
| H | 1.78570300  | -3.75954600 | 3.73135200  |
| H | 1.88985500  | -3.31553900 | -4.26190600 |

**9\_S<sub>P</sub>** ( $\eta^3$ -N1,N2,O)

E<sub>elec</sub> (M06/BS1) = -1638.39743833 au

H<sub>corr</sub> (M06/BS1) = 0.551298 au

G<sub>corr</sub> (M06/BS1) = 0.453241 au

SPE (M06/BS2//M06/BS1) = -1638.27929159 au

0 1

|   |             |             |             |
|---|-------------|-------------|-------------|
| C | -4.02549300 | 0.55377000  | -1.13517700 |
| C | -3.35098900 | 1.54782000  | -0.52633400 |
| C | -2.25609800 | -0.36436600 | -0.10209300 |
| N | -3.33798900 | -0.62888100 | -0.89203500 |
| H | -4.90602000 | 0.57229600  | -1.76133100 |
| H | -3.51271100 | 2.61637700  | -0.50595700 |
| N | -2.24485000 | 0.98323500  | 0.10875400  |
| N | -1.45957900 | -1.35111300 | 0.32599000  |
| N | -0.33957800 | -1.01007900 | 1.12343700  |
| O | 0.19844600  | -2.24774500 | 1.37535600  |
| V | -1.46241500 | -2.08547100 | 2.20410800  |
| C | -1.32842800 | 1.76788000  | 0.88423600  |
| C | -1.82096200 | 2.45180700  | 1.99047400  |
| C | -0.00029200 | 1.88789500  | 0.48946800  |
| C | -0.96090800 | 3.26314100  | 2.72381200  |
| C | 0.85249800  | 2.69312100  | 1.23427100  |
| C | 0.37390800  | 3.38053500  | 2.34857900  |
| H | -1.33549400 | 3.79564400  | 3.59555600  |
| H | 1.89473500  | 2.78973100  | 0.93784900  |
| C | -3.76813700 | -1.91728800 | -1.33809900 |
| C | -2.85316900 | -2.83313800 | -1.85410400 |
| C | -5.12337100 | -2.22216900 | -1.26792600 |
| C | -3.30880700 | -4.07477600 | -2.28054800 |
| C | -5.56794100 | -3.46366200 | -1.70844000 |
| C | -4.66326800 | -4.39396600 | -2.20917700 |
| H | -2.59722300 | -4.79492600 | -2.67974500 |
| H | -6.62659500 | -3.70678000 | -1.64047700 |
| C | -3.46867800 | -2.52888300 | 2.01140100  |
| C | -4.08008700 | -3.78497200 | 1.87564700  |
| C | -4.32138700 | -1.41551000 | 2.13939300  |
| C | -5.46580200 | -3.92677000 | 1.88119800  |
| C | -5.70943700 | -1.54940200 | 2.17086000  |
| C | -6.28492200 | -2.81050900 | 2.03784600  |
| H | -5.91056900 | -4.91595100 | 1.77008400  |
| H | -6.34018900 | -0.66838100 | 2.29160200  |
| C | -1.06869700 | -4.00088500 | 2.77419600  |
| C | -1.22012300 | -4.46214700 | 4.08938300  |
| C | -0.80368200 | -4.94413600 | 1.77213100  |



|   |             |             |             |
|---|-------------|-------------|-------------|
| C | -1.12188600 | -5.82200200 | 4.38701600  |
| C | -0.72352200 | -6.30467800 | 2.06388400  |
| C | -0.88180000 | -6.74760800 | 3.37536800  |
| H | -1.23674400 | -6.15845800 | 5.41766300  |
| H | -0.53263300 | -7.02214600 | 1.26556000  |
| C | -1.31776300 | -0.94667500 | 3.86108200  |
| C | -0.29425400 | 0.00042800  | 4.02291100  |
| C | -2.20526300 | -1.15027400 | 4.93505500  |
| C | -0.15032100 | 0.70813800  | 5.21264900  |
| C | -2.06395800 | -0.44356100 | 6.12721600  |
| C | -1.03417300 | 0.48517000  | 6.26644800  |
| H | 0.64696700  | 1.44444700  | 5.31444100  |
| H | -2.76100100 | -0.61425700 | 6.94695200  |
| H | -0.68325700 | -4.61215300 | 0.73780300  |
| H | -1.41863800 | -3.75936300 | 4.90078200  |
| H | -0.81390700 | -7.80950600 | 3.60835600  |
| H | -3.90411500 | -0.40681700 | 2.23824600  |
| H | -3.45927900 | -4.67701300 | 1.77040200  |
| H | -7.36854600 | -2.92280400 | 2.05285500  |
| H | -0.92466600 | 1.03968100  | 7.19765600  |
| H | -3.02125700 | -1.87074300 | 4.84321800  |
| H | 0.38751000  | 0.19889600  | 3.19423400  |
| H | -2.86684700 | 2.33803200  | 2.27413200  |
| H | 0.35324100  | 1.34955500  | -0.38717500 |
| H | 1.04588600  | 4.01265800  | 2.92594100  |
| H | -5.82069300 | -1.50720800 | -0.83456700 |
| H | -5.01213700 | -5.36831700 | -2.54553300 |
| H | -1.79835800 | -2.57938900 | -1.90679000 |

**8i\_S<sub>P</sub>** ( $\eta^2$ -N<sub>2</sub>O)

E<sub>elec</sub> (M06/BS1) = -1638.37888734 au

H<sub>corr</sub> (M06/BS1) = 0.551229 au

G<sub>corr</sub> (M06/BS1) = 0.448111 au

SPE (M06/BS2//M06/BS1) = -1638.260706520 au

0 1

|   |             |             |             |
|---|-------------|-------------|-------------|
| C | -0.47908100 | 2.96971000  | 2.93649300  |
| C | 0.74854500  | 2.45059500  | 3.08829000  |
| C | -0.54527900 | 0.84248000  | 2.14848300  |
| N | -1.29399400 | 1.98524900  | 2.37447400  |
| H | -0.87956800 | 3.93409900  | 3.21530900  |
| H | 1.64603200  | 2.86200600  | 3.52889200  |
| N | 0.72153400  | 1.12975400  | 2.62019600  |
| N | -1.05351000 | -0.20533800 | 1.54994500  |
| N | -0.21527200 | -1.24216600 | 1.27433700  |
| O | 0.79854200  | -0.88300700 | 0.33765500  |
| V | -0.20281600 | -2.16192700 | -0.36323400 |
| C | 1.82820700  | 0.24539900  | 2.76610300  |
| C | 1.67703200  | -0.98278100 | 3.40458000  |
| C | 3.07107600  | 0.64791600  | 2.28383800  |
| C | 2.77522600  | -1.82808000 | 3.52248500  |
| C | 4.16783900  | -0.19458400 | 2.42544900  |
| C | 4.01993800  | -1.43830900 | 3.03444200  |
| H | 2.65516400  | -2.79764400 | 4.00339100  |
| H | 5.13804000  | 0.11763400  | 2.04392200  |
| C | -2.64756000 | 2.18322200  | 2.00295900  |
| C | -3.59925000 | 1.18539000  | 2.21800000  |
| C | -3.02658200 | 3.41043700  | 1.45870700  |
| C | -4.92670800 | 1.42350700  | 1.88121600  |
| C | -4.36013600 | 3.64189700  | 1.13963200  |
| C | -5.31397300 | 2.64974900  | 1.34660600  |
| H | -5.66779900 | 0.64496300  | 2.05393200  |
| H | -4.65023100 | 4.60172700  | 0.71645900  |
| C | -0.59737500 | -1.49055100 | -2.21373700 |
| C | -0.76700800 | -2.37462800 | -3.29223600 |
| C | -0.65114400 | -0.11122700 | -2.46570400 |
| C | -0.95895700 | -1.89425000 | -4.58493200 |
| C | -0.85452300 | 0.37212600  | -3.75564800 |
| C | -1.00379500 | -0.52040400 | -4.81543000 |
| H | -1.08245300 | -2.59147800 | -5.41270500 |
| H | -0.89023600 | 1.44551600  | -3.93776300 |
| C | 0.95468800  | -3.78305900 | -0.22228100 |
| C | 1.59888600  | -4.35404300 | -1.32878800 |
| C | 1.10923500  | -4.38172900 | 1.03737300  |

|   |             |             |             |
|---|-------------|-------------|-------------|
| C | 2.36392200  | -5.50972200 | -1.18194100 |
| C | 1.87576100  | -5.53424400 | 1.18437800  |
| C | 2.50068900  | -6.09840600 | 0.07305700  |
| H | 2.85667900  | -5.95051200 | -2.04764600 |
| H | 1.98879900  | -5.99321500 | 2.16598300  |
| C | -2.13458100 | -2.72206000 | -0.05750100 |
| C | -3.22628700 | -1.86529800 | 0.15006700  |
| C | -2.39866800 | -4.08893300 | -0.25452000 |
| C | -4.52932900 | -2.35060000 | 0.15536400  |
| C | -3.70605300 | -4.58017200 | -0.23531700 |
| C | -4.77278500 | -3.71163600 | -0.03262000 |
| H | -5.36323400 | -1.66427700 | 0.30487900  |
| H | -3.88646400 | -5.64499100 | -0.38111600 |
| H | 3.09983300  | -7.00062200 | 0.18646000  |
| H | 0.62031900  | -3.94267300 | 1.90982600  |
| H | 1.50908000  | -3.89738500 | -2.31633300 |
| H | 4.87608200  | -2.10295300 | 3.13218200  |
| H | 3.16724900  | 1.60917000  | 1.78066100  |
| H | 0.70450000  | -1.27350300 | 3.79542900  |
| H | -1.58280400 | -4.79507400 | -0.42459200 |
| H | -5.79337100 | -4.09208300 | -0.02080800 |
| H | -3.04754500 | -0.80133400 | 0.30826700  |
| H | -3.29449900 | 0.23225700  | 2.64177900  |
| H | -6.35607600 | 2.83143000  | 1.09123000  |
| H | -2.27446600 | 4.17606200  | 1.27452800  |
| H | -0.75753300 | -3.45553700 | -3.12891900 |
| H | -1.15801700 | -0.14343000 | -5.82543400 |
| H | -0.52267800 | 0.59407500  | -1.64156900 |

**9i\_S<sub>P</sub>** ( $\eta^3$ -N1,N2,O)

E<sub>elec</sub> (M06/BS1) = -1638.39414691 au

H<sub>corr</sub> (M06/BS1) = 0.550522 au

G<sub>corr</sub> (M06/BS1) = 0.450454 au

SPE (M06/BS2//M06/BS1) = -1638.27713140 au

0 1

|   |             |             |             |
|---|-------------|-------------|-------------|
| C | -4.33721000 | 0.65749300  | -0.68111900 |
| C | -3.43680900 | 1.62538900  | -0.42639200 |
| C | -2.55749000 | -0.31247300 | 0.28727100  |
| N | -3.80465000 | -0.54042900 | -0.21754500 |
| H | -5.33031500 | 0.70302200  | -1.10479400 |
| H | -3.46831400 | 2.69467400  | -0.58113400 |
| N | -2.33709000 | 1.02860300  | 0.18950400  |
| N | -1.79442900 | -1.30718200 | 0.74495400  |
| N | -0.56475400 | -1.12923600 | 1.40883400  |
| O | 0.36607900  | -0.68362900 | 0.45543300  |
| V | -0.29157700 | -2.31051900 | -0.04395600 |
| C | -1.17709600 | 1.76637000  | 0.58701800  |
| C | -0.83007700 | 1.84387700  | 1.92987300  |
| C | -0.43990000 | 2.41812500  | -0.39551000 |
| C | 0.30278100  | 2.56505500  | 2.28955100  |
| C | 0.68504900  | 3.14525600  | -0.02375300 |
| C | 1.05939900  | 3.21266800  | 1.31614100  |
| H | 0.59221100  | 2.62445500  | 3.33650400  |
| H | 1.27367000  | 3.65415400  | -0.78419300 |
| C | -4.47647900 | -1.79923300 | -0.28791600 |
| C | -4.49640700 | -2.65099200 | 0.81518200  |
| C | -5.14683100 | -2.12949800 | -1.46013700 |
| C | -5.17533800 | -3.85996800 | 0.72170600  |
| C | -5.83165100 | -3.33700500 | -1.53762500 |
| C | -5.84251500 | -4.20651800 | -0.45192300 |
| H | -5.19082600 | -4.53033400 | 1.57919700  |
| H | -6.34573800 | -3.60199200 | -2.45955400 |
| C | 1.20461900  | -2.25009600 | -1.45699200 |
| C | 1.90593000  | -1.10717900 | -1.86044000 |
| C | 1.57998600  | -3.47780000 | -2.02965200 |
| C | 2.94598500  | -1.18120200 | -2.78443800 |
| C | 2.63645600  | -3.56258100 | -2.93561400 |
| C | 3.31997200  | -2.41207500 | -3.31979900 |
| H | 3.47406800  | -0.27524600 | -3.08284600 |
| H | 2.91745000  | -4.53036600 | -3.35137400 |
| C | 0.09695400  | -3.98445200 | 0.99559100  |
| C | 1.34409200  | -4.54789600 | 1.29818200  |
| C | -1.06222200 | -4.61966200 | 1.46982000  |

|   |             |             |             |
|---|-------------|-------------|-------------|
| C | 1.43011500  | -5.72177000 | 2.04160100  |
| C | -0.97800200 | -5.79750600 | 2.21081100  |
| C | 0.26941700  | -6.34716100 | 2.49578500  |
| H | 2.40443700  | -6.15431800 | 2.26634400  |
| H | -1.88505700 | -6.28237100 | 2.57056400  |
| C | -1.48476300 | -2.55748100 | -1.69519300 |
| C | -1.95906600 | -3.83170200 | -2.03139300 |
| C | -1.78523800 | -1.49742900 | -2.56218900 |
| C | -2.70115900 | -4.03916800 | -3.19619400 |
| C | -2.52548400 | -1.69890200 | -3.72394000 |
| C | -2.98623400 | -2.97565900 | -4.04595100 |
| H | -3.06076000 | -5.04040900 | -3.43491500 |
| H | -2.73865600 | -0.85855600 | -4.38536200 |
| H | 0.33807900  | -7.26608600 | 3.07632300  |
| H | -2.04959700 | -4.19219000 | 1.26647400  |
| H | 2.25783500  | -4.07045400 | 0.94087500  |
| H | 1.94415100  | 3.77740500  | 1.60352000  |
| H | -1.43326700 | 1.33060400  | 2.67588900  |
| H | -0.73990500 | 2.33510800  | -1.43980200 |
| H | -3.98183100 | -2.36916400 | 1.73035200  |
| H | -5.09973800 | -1.46230400 | -2.31894400 |
| H | -3.56416500 | -3.13835800 | -4.95492700 |
| H | -1.74590900 | -4.68982700 | -1.38836900 |
| H | -6.37299000 | -5.15445500 | -0.51696400 |
| H | 4.13689100  | -2.47389200 | -4.03783900 |
| H | 1.63462600  | -0.13588600 | -1.44148900 |
| H | 1.04729400  | -4.39447700 | -1.76546800 |
| H | -1.41545500 | -0.49017200 | -2.33835000 |

**Cartesian coordinates, electronic energies ( $E_{\text{elec}}$ ), thermal corrections to enthalpies ( $H_{\text{corr}}$ ) and Gibbs ( $G_{\text{corr}}$ ) energies and single-point energies (SPE) for TS8, *a*TSB8 & *a*TSB9 (singlet) in Solvent = THF**

**TS8\_S**

$E_{\text{elec}}$  (M06/BS1) = -680.46301127 au

$H_{\text{corr}}$  (M06/BS1) = 0.266287 au

$G_{\text{corr}}$  (M06/BS1) = 0.1204836 au

SPE (M06/BS2//M06/BS1) = -680.08728352 au

0 1

|   |             |             |             |
|---|-------------|-------------|-------------|
| C | 3.38820700  | 0.87410700  | 0.42957300  |
| C | 3.53674600  | -0.46526000 | 0.47031000  |
| C | 1.47041700  | -0.04346200 | -0.28671400 |
| N | 2.10585900  | 1.13176200  | -0.03289200 |
| H | 4.06457300  | 1.67612400  | 0.68927200  |
| H | 4.37561300  | -1.07879300 | 0.76798800  |
| N | 2.34680200  | -1.03922500 | 0.03345200  |
| C | 1.48306800  | 2.42942700  | -0.17727600 |
| H | 1.19946900  | 2.60648700  | -1.22106100 |
| H | 0.58478200  | 2.48593700  | 0.44864600  |
| H | 2.19689200  | 3.19368300  | 0.13914900  |
| C | 2.16777800  | -2.46413000 | -0.19855700 |
| H | 1.78094800  | -2.63385300 | -1.20766800 |
| H | 3.14674900  | -2.94189800 | -0.10315900 |
| H | 1.47180200  | -2.89750400 | 0.52375100  |
| N | 0.24962100  | -0.10399000 | -0.82370900 |
| N | -0.43584800 | -1.27149500 | -0.47606400 |
| O | -1.57369400 | -1.30074300 | -1.29051900 |
| V | -1.80843000 | -0.03752400 | -0.01408100 |
| C | -1.38004600 | -0.26645100 | 1.94616500  |
| H | -1.98001400 | 0.43860500  | 2.54094400  |
| H | -1.57243600 | -1.29796900 | 2.26842800  |
| H | -0.30751400 | -0.04230100 | 2.06518400  |
| C | -3.80152600 | -0.33345400 | 0.20402100  |
| H | -4.23538300 | 0.44802300  | 0.84559800  |
| H | -4.25583000 | -0.27074600 | -0.79692800 |
| H | -4.00516300 | -1.32765600 | 0.62629800  |
| C | -1.99012700 | 1.92284600  | -0.52080900 |
| H | -1.99808800 | 2.43634800  | 0.45766300  |
| H | -1.20459500 | 2.34697700  | -1.15285400 |
| H | -2.97484600 | 2.06009000  | -0.99077700 |

## *a*TS8\_S

$E_{\text{elec}}$  (M06/BS1) = -680.37197868 au

$H_{\text{corr}}$  (M06/BS1) = 0.266935 au

$G_{\text{corr}}$  (M06/BS1) = 0.205579 au

SPE (M06/BS2//M06/BS1) = -679.99922651 au

0 1

|   |             |             |            |
|---|-------------|-------------|------------|
| O | 1.22489100  | 4.01325200  | 6.18472000 |
| N | -1.23305400 | 0.72330900  | 6.48905000 |
| N | -1.33868200 | 0.74197300  | 4.30594000 |
| N | 0.06430600  | 2.39112800  | 5.26322200 |
| N | 0.11088500  | 3.24992700  | 6.39815600 |
| C | -0.79876000 | 1.38042400  | 5.37573000 |
| C | -2.04549000 | -0.33453000 | 6.09373700 |
| H | -2.50168200 | -0.98951300 | 6.82270200 |
| C | -2.10615700 | -0.32605300 | 4.74678100 |
| H | -2.62776900 | -0.96865400 | 4.05176800 |
| C | -0.77976300 | 0.93318100  | 7.85605200 |
| H | 0.31293000  | 0.96932100  | 7.88828300 |
| H | -1.17740800 | 1.86370300  | 8.27050400 |
| H | -1.12853700 | 0.08692000  | 8.45380200 |
| C | -1.11134500 | 1.12859800  | 2.92956500 |
| H | -1.28425600 | 2.20510800  | 2.81737400 |
| H | -0.08058400 | 0.90783800  | 2.63044500 |
| H | -1.80389300 | 0.57088000  | 2.29459400 |
| V | 0.24595900  | 4.34523300  | 4.62224700 |
| C | -1.45455400 | 4.25628800  | 6.40423800 |
| H | -2.03831900 | 3.40028500  | 6.75504200 |
| H | -1.16265000 | 4.90719300  | 7.23206300 |
| H | -2.05146900 | 4.81465200  | 5.67370500 |
| C | -0.39394600 | 6.27117700  | 4.56382000 |
| H | -1.23100200 | 6.22670800  | 3.84089000 |
| H | -0.71757400 | 6.83515700  | 5.44751600 |
| H | 0.45276100  | 6.79548100  | 4.08310000 |
| C | 0.75014300  | 4.05095800  | 2.68230700 |
| H | -0.15353400 | 4.22242800  | 2.07067300 |
| H | 1.45447700  | 4.88551200  | 2.50787800 |
| H | 1.22638000  | 3.11234700  | 2.37409500 |

## ***a*TS9\_S**

$E_{\text{elec}}$  (M06/BS1) = -680.36864091 au  
 $H_{\text{corr}}$  (M06/BS1) = 0.266346 au  
 $G_{\text{corr}}$  (M06/BS1) = 0.204244 au  
SPE (M06/BS2//M06/BS1) = -679.99589656

0 1

|   |             |             |             |
|---|-------------|-------------|-------------|
| C | -4.22139800 | 0.91991400  | -0.80683900 |
| C | -3.46512700 | 1.89458500  | -0.26382700 |
| C | -2.52539200 | -0.06127800 | 0.27683200  |
| N | -3.64017900 | -0.29399000 | -0.46452300 |
| H | -5.12282400 | 0.96194100  | -1.40182000 |
| H | -3.56949900 | 2.97031100  | -0.28197300 |
| N | -2.40728800 | 1.28934700  | 0.41022600  |
| C | -4.09458100 | -1.61216000 | -0.85171700 |
| H | -4.14421000 | -2.25974500 | 0.03391500  |
| H | -5.08779900 | -1.51947700 | -1.29783000 |
| H | -3.40791000 | -2.06269700 | -1.57692300 |
| C | -1.30542800 | 2.01417100  | 1.02480300  |
| H | -0.35127600 | 1.68103100  | 0.60638600  |
| H | -1.44534300 | 3.07554200  | 0.80359300  |
| H | -1.28828200 | 1.86588200  | 2.10834300  |
| N | -1.71654900 | -1.03403700 | 0.69251200  |
| N | -0.86321400 | -0.74252100 | 1.80309900  |
| O | -0.00099400 | -1.78874200 | 1.85227000  |
| V | -1.75561900 | -2.61336700 | 1.86394700  |
| C | -0.95952400 | -4.46136900 | 1.68909800  |
| H | -0.82095700 | -4.79174100 | 2.73481300  |
| H | -1.75650400 | -5.06839100 | 1.22410400  |
| H | -0.01898300 | -4.59441400 | 1.14274500  |
| C | -3.53091800 | -3.02196400 | 2.80325900  |
| H | -3.23778100 | -3.53865900 | 3.73610200  |
| H | -4.25027600 | -2.23120300 | 3.05984500  |
| H | -4.02512200 | -3.76272700 | 2.14624500  |
| C | -1.77309300 | -0.72533400 | 3.42947100  |
| H | -2.19713800 | -1.46681800 | 4.11623600  |
| H | -0.90887900 | -0.25088500 | 3.90003600  |
| H | -2.54203700 | 0.01106000  | 3.16897800  |



**Cartesian coordinates, electronic energies ( $E_{\text{elec}}$ ), thermal corrections to enthalpies ( $H_{\text{corr}}$ ) and Gibbs ( $G_{\text{corr}}$ ) energies and single-point energies (SPE) for TSB8, TSB9i, TSB8<sub>p</sub>, TSB9<sub>p</sub> & TSB9i<sub>p</sub> (singlet) in Solvent = THF**

**TSB8\_S**

$E_{\text{elec}}$  (M06/BS1) = -680.45596783 au

$H_{\text{corr}}$  (M06/BS1) = 0.265512 au

$G_{\text{corr}}$  (M06/BS1) = 0.200415 au

SPE (M06/BS2//M06/BS1) = -680.07950200 au

0 1

|   |             |             |             |
|---|-------------|-------------|-------------|
| O | -2.28712900 | 2.41108500  | 5.44289800  |
| N | -0.30311500 | 1.07889800  | 8.20680400  |
| N | -0.93588400 | 2.50111100  | 9.73783500  |
| N | -2.35997600 | 2.41919600  | 7.88064300  |
| N | -2.73906600 | 1.69140100  | 6.84523500  |
| C | -1.26881700 | 1.98471500  | 8.52589800  |
| C | 0.62765500  | 1.03447900  | 9.24044600  |
| H | 1.48431200  | 0.37662700  | 9.19160900  |
| C | 0.23735700  | 1.91549400  | 10.18463200 |
| H | 0.68023200  | 2.18886500  | 11.13205300 |
| C | -0.20759700 | 0.26835300  | 7.00113600  |
| H | -0.86419400 | -0.60526400 | 7.06233900  |
| H | -0.48446700 | 0.86106000  | 6.12716900  |
| H | 0.83030800  | -0.06427300 | 6.90580700  |
| C | -1.72247500 | 3.50594000  | 10.42478900 |
| H | -1.76230200 | 4.42734400  | 9.83461300  |
| H | -2.74320300 | 3.14373800  | 10.58416900 |
| H | -1.25273600 | 3.70963900  | 11.39011700 |
| V | -3.99256400 | 2.46613400  | 5.67627300  |
| C | -5.30112800 | 2.27238600  | 7.24561800  |
| H | -5.32774200 | 1.21442300  | 7.54684600  |
| H | -4.99794500 | 2.87828500  | 8.10888400  |
| H | -6.29565500 | 2.58723600  | 6.89251000  |
| C | -4.49213600 | 4.40689100  | 5.44529800  |
| H | -5.57947200 | 4.49336900  | 5.31048700  |
| H | -4.17094900 | 5.00454300  | 6.30817800  |
| H | -3.97152100 | 4.75611200  | 4.54016300  |
| C | -4.82551400 | 1.29405500  | 4.27917300  |
| H | -5.88666100 | 1.58855500  | 4.25505100  |
| H | -4.36807800 | 1.46462200  | 3.29584000  |
| H | -4.74084200 | 0.23355500  | 4.55217100  |

## TSB9i\_S

$E_{\text{elec}}(\text{M06/BS1}) = -680.45611944 \text{ au}$

$H_{\text{corr}}(\text{M06/BS1}) = 0.266061 \text{ au}$

$G_{\text{corr}}(\text{M06/BS1}) = 0.202372 \text{ au}$

$\text{SPE}(\text{M06/BS2//M06/BS1}) = -680.07872577 \text{ au}$

0 1

|   |             |             |             |
|---|-------------|-------------|-------------|
| C | -4.16386200 | 0.86555200  | -1.24318500 |
| C | -2.98981800 | 1.53248600  | -1.27754200 |
| C | -2.97002900 | 0.23657700  | 0.53414300  |
| N | -4.14290000 | 0.05823900  | -0.11902600 |
| H | -5.01200300 | 0.87843500  | -1.91306700 |
| H | -2.59916200 | 2.24944600  | -1.98621800 |
| N | -2.24386000 | 1.13562600  | -0.17481100 |
| C | -5.22228600 | -0.78865500 | 0.35873900  |
| H | -4.88520300 | -1.82671700 | 0.43735200  |
| H | -5.56427300 | -0.44538200 | 1.34037400  |
| H | -6.04534700 | -0.72684300 | -0.35648600 |
| C | -0.95088600 | 1.71032100  | 0.18165400  |
| H | -0.27637200 | 0.92381500  | 0.52390000  |
| H | -0.54390800 | 2.18812300  | -0.71322200 |
| H | -1.07142700 | 2.45939200  | 0.97093300  |
| N | -2.70673900 | -0.41920800 | 1.67877500  |
| N | -1.56418500 | -0.25336400 | 2.31738700  |
| O | -0.40816900 | -1.16165500 | 1.46613600  |
| V | -1.53127800 | -2.17312200 | 2.28811200  |
| C | -0.32737200 | -3.65304700 | 3.00264300  |
| H | -0.92004200 | -4.50734000 | 3.35805000  |
| H | 0.29040800  | -3.97139900 | 2.14667000  |
| H | 0.32982100  | -3.29540700 | 3.80671300  |
| C | -2.60089800 | -3.32408300 | 0.99596800  |
| H | -2.02925100 | -4.23846600 | 0.78151100  |
| H | -3.51811500 | -3.58925900 | 1.54844800  |
| H | -2.87126200 | -2.82506900 | 0.05779900  |
| C | -2.36256200 | -2.08080400 | 4.16893100  |
| H | -2.70219800 | -3.08180600 | 4.47442700  |
| H | -1.61949400 | -1.71108800 | 4.88847200  |
| H | -3.21144700 | -1.38302700 | 4.13782200  |

## TSB8\_Sp

$E_{\text{elec}}(\text{M06/BS1}) = -1638.37787842 \text{ au}$   
 $H_{\text{corr}}(\text{M06/BS1}) = 0.549409 \text{ au}$   
 $G_{\text{corr}}(\text{M06/BS1}) = 0.446844 \text{ au}$   
 $\text{SPE}(\text{M06/BS2//M06/BS1}) = -1638.25856315 \text{ au}$

0 1

|   |             |             |             |
|---|-------------|-------------|-------------|
| O | -0.15935000 | 0.68721400  | -1.98419500 |
| N | 1.65962700  | -2.72078200 | -0.13803300 |
| N | 3.43501100  | -1.44573800 | -0.27022700 |
| N | 1.37392700  | -0.29680200 | -0.40478700 |
| N | 0.13042500  | -0.42143400 | -0.78180000 |
| C | 2.06964600  | -1.42811400 | -0.31125000 |
| C | 2.78103500  | -3.53778300 | 0.00435500  |
| H | 2.67396100  | -4.60359100 | 0.15096700  |
| C | 3.87265100  | -2.75231100 | -0.06700500 |
| H | 4.92589500  | -2.99153900 | -0.02544200 |
| V | -1.14668300 | 0.92086900  | -0.60073400 |
| C | 0.31791300  | -3.19622500 | 0.02314700  |
| C | -0.18421300 | -4.10632200 | -0.90148200 |
| C | -0.43662600 | -2.78880200 | 1.11974600  |
| C | -1.47110500 | -4.60852100 | -0.73111600 |
| C | -1.72569700 | -3.28641000 | 1.27206100  |
| C | -2.24294400 | -4.19612600 | 0.35206100  |
| H | -1.87159900 | -5.32039500 | -1.45011400 |
| H | -2.32616000 | -2.95348300 | 2.11707100  |
| C | 4.28478100  | -0.31249100 | -0.43050700 |
| C | 4.06402300  | 0.59386200  | -1.46615900 |
| C | 5.35116200  | -0.14785600 | 0.44985000  |
| C | 4.91921000  | 1.68021400  | -1.60678600 |
| C | 6.20837100  | 0.93559000  | 0.28926800  |
| C | 5.99172100  | 1.85245700  | -0.73479100 |
| H | 4.75085500  | 2.39111100  | -2.41319300 |
| H | 7.04209200  | 1.06628400  | 0.97599700  |
| C | -0.92215500 | 2.89672300  | -0.24145300 |
| C | -1.93075400 | 3.63585100  | 0.39720900  |
| C | 0.23542900  | 3.57327100  | -0.65419600 |
| C | -1.80043600 | 5.00845600  | 0.59227300  |
| C | 0.37540500  | 4.94421500  | -0.44756500 |
| C | -0.64470100 | 5.66356200  | 0.17069700  |
| H | -2.59601500 | 5.56642900  | 1.08514700  |
| H | 1.28018300  | 5.45489800  | -0.77629800 |
| C | -0.99506600 | 0.59409500  | 1.43965600  |
| C | -2.16352900 | 0.17262800  | 2.09593800  |
| C | 0.15707600  | 0.76514500  | 2.22293700  |

|   |             |             |             |
|---|-------------|-------------|-------------|
| C | -2.17348900 | -0.08807600 | 3.46930000  |
| C | 0.15418600  | 0.50989600  | 3.59069700  |
| C | -1.01362200 | 0.07330600  | 4.21859000  |
| H | -3.09292200 | -0.42350500 | 3.95017000  |
| H | 1.06438900  | 0.65264100  | 4.17350600  |
| C | -2.95942900 | 0.27996900  | -1.16380400 |
| C | -4.07758800 | 1.12251000  | -1.24256600 |
| C | -3.13725200 | -1.09790700 | -1.36471200 |
| C | -5.34434300 | 0.59818000  | -1.49568700 |
| C | -4.40256500 | -1.62206600 | -1.61381900 |
| C | -5.50650300 | -0.77314300 | -1.67858400 |
| H | -6.20619900 | 1.26200900  | -1.55400300 |
| H | -4.52679100 | -2.69507700 | -1.76015500 |
| H | -6.49675700 | -1.18152700 | -1.87573800 |
| H | -2.28047400 | -1.77402900 | -1.30868700 |
| H | -0.53771600 | 6.73595800  | 0.32852900  |
| H | 3.23410800  | 0.44503600  | -2.15249200 |
| H | 1.03691700  | 3.02099500  | -1.14980000 |
| H | 6.65968400  | 2.70297600  | -0.85467300 |
| H | -2.83014500 | 3.13495300  | 0.76574600  |
| H | 1.07996700  | 1.10119700  | 1.74683500  |
| H | -3.09019100 | 0.02199800  | 1.53694600  |
| H | -1.01726900 | -0.13280000 | 5.28830300  |
| H | 5.49588900  | -0.85558100 | 1.26473300  |
| H | 0.42929300  | -4.40526900 | -1.75003500 |
| H | -0.02913900 | -2.06739000 | 1.82844400  |
| H | -3.25191400 | -4.58380900 | 0.48088200  |
| H | -3.96791200 | 2.20042100  | -1.10610700 |

## TSB9\_Sp

$E_{\text{elec}}$  (M06/BS1) = -1638.37649410 au  
 $H_{\text{corr}}$  (M06/BS1) = 0.549593 au  
 $G_{\text{corr}}$  (M06/BS1) = 0.448423 au  
SPE (M06/BS2//M06/BS1) = -1638.25697973 au

0 1

|   |             |             |             |
|---|-------------|-------------|-------------|
| C | -0.70990200 | -4.58211200 | -0.26166100 |
| C | -1.82076500 | -4.19431500 | -0.91728900 |
| C | -0.67189800 | -2.33671200 | -0.38598400 |
| N | 0.00542400  | -3.43102200 | 0.05790000  |
| H | -0.33194400 | -5.56243200 | -0.00751500 |
| H | -2.64183900 | -4.75921200 | -1.33620000 |
| N | -1.80282700 | -2.80098300 | -0.99254400 |
| N | -0.25556100 | -1.09191600 | -0.15813900 |
| N | -0.68193800 | -0.12220000 | -0.94876400 |
| O | 0.66010600  | 0.35063300  | -1.79486500 |
| V | 0.58527800  | 1.12984700  | -0.26658800 |
| C | -2.90050000 | -2.02995500 | -1.49226600 |
| C | -3.66776900 | -1.27439300 | -0.61150800 |
| C | -3.21872500 | -2.11136000 | -2.84327600 |
| C | -4.76033400 | -0.56994000 | -1.10316000 |
| C | -4.32055400 | -1.41041700 | -3.32314300 |
| C | -5.08758900 | -0.63733300 | -2.45585400 |
| H | -5.36426300 | 0.02964400  | -0.42421800 |
| H | -4.57585800 | -1.46514000 | -4.37927100 |
| C | 1.31702800  | -3.41557400 | 0.62382100  |
| C | 2.36076100  | -2.81221900 | -0.07323800 |
| C | 1.53178600  | -4.04639200 | 1.84452500  |
| C | 3.63944000  | -2.84618300 | 0.46750700  |
| C | 2.81857400  | -4.07769200 | 2.37406800  |
| C | 3.86972300  | -3.47691900 | 1.68821900  |
| H | 4.45944600  | -2.36579400 | -0.06275200 |
| H | 2.99488600  | -4.56833900 | 3.32922100  |
| C | 2.23995700  | 0.66743100  | 0.79207600  |
| C | 3.46996500  | 1.07417400  | 0.25635300  |
| C | 2.23086700  | 0.04660300  | 2.04849300  |
| C | 4.65642100  | 0.88904000  | 0.96675900  |
| C | 3.40983100  | -0.12292200 | 2.76835500  |
| C | 4.62446600  | 0.29642900  | 2.22651100  |
| H | 5.60480300  | 1.21044100  | 0.53701600  |
| H | 3.38586800  | -0.60361700 | 3.74630800  |
| C | 0.72181400  | 3.05446800  | -0.85564000 |
| C | 1.47353400  | 4.01094700  | -0.15442300 |
| C | -0.00323700 | 3.47864000  | -1.98026000 |

|   |             |             |             |
|---|-------------|-------------|-------------|
| C | 1.50831200  | 5.34000700  | -0.56982300 |
| C | 0.01940000  | 4.80878300  | -2.39156200 |
| C | 0.77890100  | 5.74112200  | -1.68724400 |
| H | 2.10307400  | 6.06692100  | -0.01735500 |
| H | -0.55065300 | 5.11850400  | -3.26707700 |
| C | -0.90473000 | 1.65698000  | 1.06261100  |
| C | -2.27435900 | 1.61274000  | 0.77034000  |
| C | -0.52848200 | 2.16098800  | 2.31991300  |
| C | -3.23239900 | 2.03624100  | 1.68824700  |
| C | -1.48068800 | 2.57408600  | 3.25151700  |
| C | -2.83590700 | 2.51329200  | 2.93647200  |
| H | -4.29154800 | 1.99578100  | 1.43156100  |
| H | -1.16226200 | 2.94948200  | 4.22412400  |
| H | -0.59344800 | 2.75351100  | -2.54504900 |
| H | 2.04536100  | 3.72129400  | 0.72967900  |
| H | 0.80311600  | 6.78109700  | -2.00997000 |
| H | 1.28986000  | -0.31761900 | 2.46592700  |
| H | 3.51165800  | 1.54588000  | -0.72862200 |
| H | 5.54912000  | 0.15246800  | 2.78423900  |
| H | -3.58101400 | 2.84063400  | 3.66069900  |
| H | 0.52755600  | 2.23021900  | 2.59246500  |
| H | -2.59759500 | 1.23688800  | -0.20350300 |
| H | -3.39860200 | -1.23167500 | 0.44297300  |
| H | -2.59992400 | -2.71400900 | -3.50618100 |
| H | -5.94670600 | -0.08695900 | -2.83408700 |
| H | 0.69545300  | -4.50376700 | 2.37141400  |
| H | 4.87368800  | -3.49340800 | 2.10871000  |
| H | 2.16350200  | -2.32097200 | -1.02461000 |

## TSB9i\_Sp

$E_{\text{elec}}$  (M06/BS1) = -1638.38030299 au

$H_{\text{corr}}$  (M06/BS1) = 0.549515 au

$G_{\text{corr}}$  (M06/BS1) = 0.448649 au

SPE (M06/BS2//M06/BS1) = -1638.26169704 au

0 1

|   |             |             |             |
|---|-------------|-------------|-------------|
| C | 0.37422100  | -4.03697100 | 0.13904500  |
| C | 1.69991500  | -3.81326100 | 0.03873800  |
| C | 0.65256800  | -2.00657000 | -0.75491900 |
| N | -0.27490500 | -2.92092300 | -0.37167600 |
| H | -0.17962600 | -4.89895400 | 0.48275200  |
| H | 2.55221100  | -4.43446900 | 0.27562400  |
| N | 1.87420300  | -2.55276300 | -0.53033500 |
| N | 0.29341200  | -0.77737800 | -1.17505800 |
| N | 1.12102600  | 0.15162200  | -1.59849400 |
| O | 1.87884000  | 0.82805600  | -0.20077700 |
| V | 0.18951600  | 1.06190400  | -0.20007100 |
| C | 3.16374500  | -1.98960500 | -0.80280000 |
| C | 3.50715400  | -1.63367600 | -2.10133100 |
| C | 4.05837900  | -1.85060100 | 0.25221000  |
| C | 4.76979300  | -1.10308300 | -2.33899500 |
| C | 5.32242400  | -1.32938500 | 0.00041900  |
| C | 5.67566000  | -0.95144600 | -1.29219800 |
| H | 5.04807900  | -0.81377700 | -3.35002700 |
| H | 6.02915000  | -1.21048900 | 0.81874200  |
| C | -1.69266300 | -2.74194700 | -0.40008700 |
| C | -2.31228200 | -2.23960500 | -1.54192100 |
| C | -2.42818300 | -3.09023000 | 0.72725200  |
| C | -3.69117300 | -2.06588400 | -1.53665200 |
| C | -3.80836100 | -2.92558800 | 0.71371400  |
| C | -4.44059500 | -2.40807700 | -0.41265800 |
| H | -4.18265400 | -1.67016100 | -2.42329400 |
| H | -4.38637500 | -3.18288700 | 1.59923700  |
| C | 0.35604200  | 2.69422900  | 1.11265500  |
| C | 1.57645500  | 2.94131600  | 1.76296700  |
| C | -0.71233600 | 3.54721900  | 1.44277600  |
| C | 1.72705600  | 3.97452900  | 2.68835700  |
| C | -0.57505800 | 4.57945500  | 2.36718100  |
| C | 0.64920900  | 4.79841900  | 2.99647900  |
| H | 2.69285200  | 4.13529700  | 3.16894000  |
| H | -1.42735500 | 5.22051100  | 2.59517700  |
| C | -0.85713100 | 2.26944500  | -1.40043900 |
| C | -0.66815800 | 3.47069800  | -2.09066300 |
| C | -2.06615200 | 1.58111800  | -1.54838900 |

|   |             |             |             |
|---|-------------|-------------|-------------|
| C | -1.66668100 | 3.96532100  | -2.91986400 |
| C | -3.07491700 | 2.07725500  | -2.38136900 |
| C | -2.87141800 | 3.26927700  | -3.06443500 |
| H | -1.51610900 | 4.90238300  | -3.45506200 |
| H | -4.01478000 | 1.53612900  | -2.48778500 |
| C | -0.69977600 | 0.08522100  | 1.39219400  |
| C | -2.02201200 | 0.29554300  | 1.81014700  |
| C | 0.07326800  | -0.81587800 | 2.14267900  |
| C | -2.55041400 | -0.36503200 | 2.91771500  |
| C | -0.44721500 | -1.47887800 | 3.25410900  |
| C | -1.76513600 | -1.25606800 | 3.64571600  |
| H | -3.58375200 | -0.18156700 | 3.21344800  |
| H | 0.18281900  | -2.16683300 | 3.81896900  |
| H | -3.65263200 | 3.66591200  | -3.71119700 |
| H | -2.24438000 | 0.63302900  | -1.02391800 |
| H | 0.26330700  | 4.02544900  | -1.96914800 |
| H | 6.66316500  | -0.53706400 | -1.48486400 |
| H | 2.78961200  | -1.76607600 | -2.90811700 |
| H | 3.75596300  | -2.13120000 | 1.26031300  |
| H | -1.72060900 | -1.98106100 | -2.41711500 |
| H | -1.91697900 | -3.42933700 | 1.62707400  |
| H | -2.17629400 | -1.76890600 | 4.51448900  |
| H | -2.66390400 | 0.99649000  | 1.27059600  |
| H | -5.52006200 | -2.27139400 | -0.41711600 |
| H | 0.76112200  | 5.60665100  | 3.71858500  |
| H | 2.43555700  | 2.30509600  | 1.53875700  |
| H | -1.68428900 | 3.41122800  | 0.96195500  |
| H | 1.11650100  | -1.00013300 | 1.86913500  |



**Cartesian coordinates, electronic energies ( $E_{\text{elec}}$ ), thermal corrections to enthalpies ( $H_{\text{corr}}$ ) and Gibbs ( $G_{\text{corr}}$ ) energies and single-point energies (SPE) for Int, TSInt, 2, Int<sub>P</sub>, TSInt<sub>P</sub> & 2<sub>P</sub> (singlet) in Solvent = THF**

**Int\_S**

$E_{\text{elec}}$  (M06/BS1) = -680.56780250 au

$H_{\text{corr}}$  (M06/BS1) = 0.270615 au

$G_{\text{corr}}$  (M06/BS1) = 0.206883 au

SPE (M06/BS2//M06/BS1) = -680.19277464 au

0 1

|   |             |             |             |
|---|-------------|-------------|-------------|
| O | -1.74242900 | 3.27893200  | 5.56819900  |
| N | -0.98509700 | 1.19257300  | 8.07901200  |
| N | -0.97288700 | 2.65329800  | 9.71262500  |
| N | -3.00644500 | 2.51865000  | 8.56651900  |
| N | -3.58950500 | 2.30143800  | 7.33940400  |
| C | -1.75502900 | 2.13698400  | 8.71311500  |
| C | 0.26091200  | 1.12943800  | 8.70357800  |
| H | 1.02458400  | 0.44882800  | 8.35295100  |
| C | 0.26430700  | 2.02326800  | 9.71077700  |
| H | 1.03297600  | 2.29040200  | 10.42250400 |
| C | -1.45301200 | 0.22156700  | 7.11344100  |
| H | -2.45063000 | -0.14029500 | 7.38990700  |
| H | -1.49798200 | 0.64536700  | 6.10318800  |
| H | -0.76001800 | -0.62526100 | 7.11852900  |
| C | -1.41463000 | 3.69669700  | 10.60825700 |
| H | -1.90671100 | 4.48874200  | 10.03411400 |
| H | -2.12551800 | 3.31022700  | 11.34882900 |
| H | -0.54311800 | 4.10734500  | 11.12533400 |
| V | -3.23871600 | 2.77608700  | 5.63310300  |
| C | -4.96142500 | 1.82377300  | 7.47816400  |
| H | -4.96345100 | 0.79993400  | 7.88224600  |
| H | -5.52207400 | 2.48138700  | 8.15671500  |
| H | -5.46665900 | 1.80704300  | 6.50211100  |
| C | -4.48074300 | 4.33492500  | 5.22911500  |
| H | -5.53135700 | 4.05739900  | 5.39745000  |
| H | -4.23710400 | 5.21974800  | 5.83039100  |
| H | -4.33736100 | 4.58424200  | 4.16502700  |
| C | -3.58052800 | 1.19734500  | 4.38838600  |
| H | -3.93302800 | 0.30253400  | 4.92158600  |
| H | -4.39821700 | 1.55634000  | 3.73669000  |
| H | -2.72284700 | 0.93350900  | 3.75789300  |

## TSInt\_S

$E_{\text{elec}}(\text{M06/BS1}) = -680.55281170 \text{ au}$

$H_{\text{corr}}(\text{M06/BS1}) = 0.269015 \text{ au}$

$G_{\text{corr}}(\text{M06/BS1}) = 0.204053 \text{ au}$

$\text{SPE}(\text{M06/BS2//M06/BS1}) = -680.17525567 \text{ au}$

0 1

|   |             |             |             |
|---|-------------|-------------|-------------|
| V | -2.01495000 | 1.17724500  | 0.80792100  |
| O | -1.16059000 | 0.61187400  | 2.02907100  |
| N | -0.54328300 | 0.25842000  | -0.90919000 |
| N | -1.00988300 | 1.56387500  | -0.64877800 |
| N | 1.24550800  | -1.22441700 | -0.77431700 |
| N | 1.66777300  | 0.70571800  | 0.16286500  |
| C | 0.70389100  | 0.00152600  | -0.51053300 |
| C | 2.53742500  | -1.28701900 | -0.27813500 |
| H | 3.14219600  | -2.17655500 | -0.38580000 |
| C | 2.79970000  | -0.09871900 | 0.29896800  |
| H | 3.68291300  | 0.26669200  | 0.80448700  |
| C | -3.42801700 | -0.19192000 | 0.34005800  |
| H | -3.89818000 | 0.11803000  | -0.60423800 |
| H | -3.00156400 | -1.19542800 | 0.22874000  |
| H | -4.17115000 | -0.19325500 | 1.15297100  |
| C | -2.88206400 | 2.92651500  | 1.32050900  |
| H | -2.13838600 | 3.66484200  | 1.65139700  |
| H | -3.42805600 | 3.31358400  | 0.44708300  |
| H | -3.58730300 | 2.74475600  | 2.14597700  |
| C | -0.70792200 | 2.58791400  | -1.61031700 |
| H | -1.12631100 | 3.53934300  | -1.25898200 |
| H | 0.37926100  | 2.71075600  | -1.75709900 |
| H | -1.14844000 | 2.34379600  | -2.58993200 |
| C | 0.52850700  | -2.27709400 | -1.45988000 |
| H | 1.18391700  | -3.14858500 | -1.53464600 |
| H | -0.37539500 | -2.54666500 | -0.90217700 |
| H | 0.23533700  | -1.95189000 | -2.46380200 |
| C | 1.58511700  | 2.03746600  | 0.74529200  |
| H | 1.48353300  | 2.80992500  | -0.02393300 |
| H | 0.75239800  | 2.10083000  | 1.44867800  |
| H | 2.51939700  | 2.21492900  | 1.28564800  |

## 2\_S

$E_{\text{elec}}(\text{M06/BS1}) = -680.57712304 \text{ au}$

$H_{\text{corr}}(\text{M06/BS1}) = 0.271120 \text{ au}$

$G_{\text{corr}}(\text{M06/BS1}) = 0.208814 \text{ au}$

$\text{SPE}(\text{M06/BS2//M06/BS1}) = -680.19852548 \text{ au}$

0 1

|   |            |             |            |
|---|------------|-------------|------------|
| V | 6.06947600 | 1.05237000  | 5.77419400 |
| O | 4.65115500 | 0.37989300  | 6.01694600 |
| N | 5.76876400 | 2.86690500  | 5.13911500 |
| N | 6.18378200 | 2.01009800  | 4.08458300 |
| N | 3.85027200 | 3.87876700  | 6.09246200 |
| N | 3.77081500 | 3.60126000  | 3.92976700 |
| C | 4.53212300 | 3.38718900  | 5.03037000 |
| C | 2.64215800 | 4.39940700  | 5.65822700 |
| H | 1.93624000 | 4.83720200  | 6.34974100 |
| C | 2.59322200 | 4.22852000  | 4.32045800 |
| H | 1.83503300 | 4.49067600  | 3.59611400 |
| C | 7.17103300 | 1.24883000  | 7.48441900 |
| H | 8.13448400 | 1.71618500  | 7.22963700 |
| H | 6.66248400 | 1.86747700  | 8.23792400 |
| H | 7.35539800 | 0.25466600  | 7.91792600 |
| C | 7.21463400 | -0.40300000 | 4.89312900 |
| H | 6.87322200 | -0.70604600 | 3.89654700 |
| H | 8.24887500 | -0.03376600 | 4.82884700 |
| H | 7.18159500 | -1.26944400 | 5.57175200 |
| C | 7.50923400 | 2.39841600  | 3.62829200 |
| H | 7.89484300 | 1.60515100  | 2.97748800 |
| H | 7.45746500 | 3.32966100  | 3.04039100 |
| H | 8.23517800 | 2.56734900  | 4.44635600 |
| C | 4.33214800 | 3.85105900  | 7.46042200 |
| H | 3.70054100 | 4.51032400  | 8.06061200 |
| H | 4.28566400 | 2.83501400  | 7.86768900 |
| H | 5.36596900 | 4.20845000  | 7.49543900 |
| C | 4.11709600 | 3.32738700  | 2.54033100 |
| H | 5.11385200 | 3.71649800  | 2.31705200 |
| H | 4.09669400 | 2.25565000  | 2.33630000 |
| H | 3.38251500 | 3.84193500  | 1.91448700 |

## Int\_Sp

$E_{\text{elec}}(\text{M06/BS1}) = -1638.50031575 \text{ au}$   
 $H_{\text{corr}}(\text{M06/BS1}) = 0.5529520 \text{ au}$   
 $G_{\text{corr}}(\text{M06/BS1}) = 0.451906 \text{ au}$   
 $\text{SPE}(\text{M06/BS2//M06/BS1}) = -1638.38108082 \text{ au}$

0 1

|   |             |             |             |
|---|-------------|-------------|-------------|
| O | -2.02673400 | 3.03035500  | 5.56397500  |
| N | -0.91958300 | 1.22373400  | 8.07237500  |
| N | -0.97339100 | 2.82726500  | 9.58808800  |
| N | -3.02878400 | 2.41820300  | 8.54051000  |
| N | -3.69825700 | 1.91907800  | 7.43523900  |
| C | -1.76625700 | 2.13109600  | 8.68464900  |
| C | 0.37947200  | 1.39567200  | 8.57636900  |
| H | 1.18669400  | 0.75296600  | 8.25428000  |
| C | 0.34262400  | 2.37027400  | 9.49582600  |
| H | 1.11729600  | 2.76449000  | 10.13823500 |
| V | -3.49598200 | 2.49052300  | 5.68729700  |
| C | -1.27480400 | 0.10985600  | 7.26526600  |
| C | -0.49104500 | -0.18512900 | 6.15139500  |
| C | -2.34839000 | -0.70968800 | 7.60905300  |
| C | -0.78796700 | -1.30081000 | 5.37631100  |
| H | 0.33476000  | 0.47361600  | 5.88498600  |
| C | -2.64954400 | -1.81167900 | 6.81671100  |
| H | -2.94420300 | -0.47939300 | 8.49093000  |
| C | -1.87230600 | -2.11124400 | 5.69991600  |
| H | -0.17964500 | -1.52459100 | 4.50160500  |
| H | -3.49462700 | -2.44476000 | 7.08325000  |
| H | -2.11116900 | -2.97634600 | 5.08432700  |
| C | -1.38201900 | 3.93487800  | 10.37125400 |
| C | -2.59754700 | 3.91443000  | 11.05726200 |
| C | -0.53418000 | 5.03790400  | 10.47887300 |
| C | -2.95781700 | 5.00285000  | 11.84270900 |
| H | -3.24836700 | 3.04873900  | 10.97122600 |
| C | -0.89951300 | 6.11504000  | 11.27853200 |
| H | 0.40061800  | 5.05703300  | 9.92081900  |
| C | -2.11273900 | 6.10356400  | 11.96028700 |
| H | -3.90639100 | 4.98415700  | 12.37638000 |
| H | -0.23443800 | 6.97308200  | 11.35597200 |
| H | -2.40029400 | 6.95128500  | 12.57916600 |
| C | -3.75119500 | 1.18377500  | 4.14873400  |
| C | -2.65681200 | 0.81000700  | 3.34589000  |
| C | -5.02575600 | 0.74111200  | 3.74293400  |
| C | -2.82171100 | 0.02022800  | 2.21090800  |
| H | -1.65269700 | 1.13308100  | 3.62149000  |

|   |             |             |            |
|---|-------------|-------------|------------|
| C | -5.19883800 | -0.03514700 | 2.60035700 |
| H | -5.91153700 | 1.00518700  | 4.32576200 |
| C | -4.09410400 | -0.40314400 | 1.83546200 |
| H | -1.95448300 | -0.26224700 | 1.61433100 |
| H | -6.19772500 | -0.35789400 | 2.30849000 |
| H | -4.22601000 | -1.01804500 | 0.94622600 |
| C | -4.68944100 | 4.10893500  | 5.52607500 |
| C | -4.18619500 | 5.38547600  | 5.21591500 |
| C | -6.08611700 | 3.95929200  | 5.61812100 |
| C | -5.04002100 | 6.46288200  | 4.99655400 |
| H | -3.10870000 | 5.53737200  | 5.14738700 |
| C | -6.94298400 | 5.03300200  | 5.39255700 |
| H | -6.52422100 | 2.98906000  | 5.86834900 |
| C | -6.41942200 | 6.28635100  | 5.08251400 |
| H | -4.62950300 | 7.44355600  | 4.75866300 |
| H | -8.02117400 | 4.89400700  | 5.46323900 |
| H | -7.08888600 | 7.12784800  | 4.90967100 |
| C | -5.02868500 | 1.52369300  | 7.73533400 |
| C | -5.79363000 | 2.22573300  | 8.68001400 |
| C | -5.59495900 | 0.45112200  | 7.04260000 |
| C | -7.11840200 | 1.87543600  | 8.88552700 |
| H | -5.33125000 | 3.04690700  | 9.22357200 |
| C | -6.93599500 | 0.12301200  | 7.24212600 |
| H | -4.97200800 | -0.13254100 | 6.36590300 |
| C | -7.70078600 | 0.83254500  | 8.15979600 |
| H | -7.71156800 | 2.42766200  | 9.61276200 |
| H | -7.37127500 | -0.70940400 | 6.69137500 |
| H | -8.74375000 | 0.56910700  | 8.32523300 |

## TSInt\_Sp

$E_{\text{elec}}$  (M06/BS1) = -1638.49596031 au  
 $H_{\text{corr}}$  (M06/BS1) = 0.551614 au  
 $G_{\text{corr}}$  (M06/BS1) = 0.451299 au  
SPE (M06/BS2//M06/BS1) = -1638.37619730 au

0 1

|   |             |             |             |
|---|-------------|-------------|-------------|
| V | -2.10818100 | 1.10507100  | 0.80057300  |
| O | -1.37917900 | 0.33202900  | 1.97616100  |
| N | -0.49200100 | 0.24438000  | -0.91884300 |
| N | -0.97121900 | 1.52514600  | -0.59519700 |
| N | 1.29040000  | -1.26769600 | -0.68712400 |
| N | 1.70675100  | 0.73457000  | 0.11053900  |
| C | 0.73886400  | -0.01470200 | -0.51757500 |
| C | 2.58571100  | -1.28195800 | -0.17090900 |
| H | 3.20124500  | -2.16854800 | -0.22665300 |
| C | 2.84560600  | -0.05483000 | 0.30772200  |
| H | 3.72814600  | 0.36165300  | 0.77315000  |
| C | 0.63332600  | -2.40583500 | -1.22874100 |
| C | -0.10650500 | -2.31154900 | -2.40727100 |
| C | 0.77909500  | -3.63194200 | -0.58162500 |
| C | -0.70553600 | -3.45230000 | -2.92791100 |
| H | -0.21400600 | -1.34903400 | -2.89982100 |
| C | 0.18696200  | -4.76926700 | -1.11995800 |
| H | 1.34228700  | -3.68765100 | 0.34871700  |
| C | -0.55880000 | -4.68246000 | -2.29137800 |
| H | -1.28545900 | -3.37918400 | -3.84599700 |
| H | 0.30240500  | -5.72518400 | -0.61272400 |
| H | -1.02708800 | -5.57222600 | -2.70778200 |
| C | 1.70553900  | 2.13150700  | 0.43449900  |
| C | 2.37553400  | 3.01055100  | -0.41103400 |
| C | 1.11331400  | 2.58011500  | 1.61092300  |
| C | 2.42976800  | 4.36303400  | -0.08858800 |
| H | 2.83075100  | 2.62963200  | -1.32445800 |
| C | 1.16727600  | 3.93427000  | 1.92336900  |
| H | 0.60130700  | 1.86669800  | 2.25514700  |
| C | 1.82347300  | 4.82482600  | 1.07552500  |
| H | 2.93956500  | 5.05608400  | -0.75502900 |
| H | 0.70218500  | 4.29553800  | 2.83897100  |
| H | 1.86305200  | 5.88327800  | 1.32647700  |
| C | -0.70503800 | 2.58513900  | -1.46277300 |
| C | -1.03337300 | 3.89553400  | -1.08068000 |
| C | -0.10343800 | 2.36771800  | -2.71115400 |
| C | -0.76741300 | 4.95592500  | -1.93345700 |
| H | -1.47326400 | 4.06934100  | -0.09860000 |

|   |             |             |             |
|---|-------------|-------------|-------------|
| C | 0.16034800  | 3.44254100  | -3.55296600 |
| H | 0.14879100  | 1.35134500  | -3.00742700 |
| C | -0.16610600 | 4.74148400  | -3.17420400 |
| H | -1.01867200 | 5.96766800  | -1.61742900 |
| H | 0.62634900  | 3.25799500  | -4.52034500 |
| H | 0.04626800  | 5.57923800  | -3.83574600 |
| C | -3.04844700 | 2.66997000  | 1.61950900  |
| C | -3.99619700 | 3.34730500  | 0.82777900  |
| C | -2.75667500 | 3.18979000  | 2.89331400  |
| C | -4.62053500 | 4.50349600  | 1.28639100  |
| H | -4.24958200 | 2.96944400  | -0.16687400 |
| C | -3.37454700 | 4.34835100  | 3.35307000  |
| H | -2.03094300 | 2.67851800  | 3.52784000  |
| C | -4.30615300 | 5.00396900  | 2.54866100  |
| H | -5.35200000 | 5.01556200  | 0.66281800  |
| H | -3.13602300 | 4.74213500  | 4.34027300  |
| H | -4.79193700 | 5.90956400  | 2.90926400  |
| C | -3.50536100 | -0.11917800 | 0.03902700  |
| C | -4.28134100 | -0.93843700 | 0.87299000  |
| C | -3.84326600 | -0.03488400 | -1.32212000 |
| C | -5.37862200 | -1.63323300 | 0.36928400  |
| H | -4.02938600 | -1.03231600 | 1.93092400  |
| C | -4.93967700 | -0.72916800 | -1.82708900 |
| H | -3.23734900 | 0.57491800  | -1.99699900 |
| C | -5.70793200 | -1.52671200 | -0.98041600 |
| H | -5.97588700 | -2.26298600 | 1.02782100  |
| H | -5.19395400 | -0.65395300 | -2.88390800 |
| H | -6.56290300 | -2.07326500 | -1.37618100 |

## 2\_Sp

$E_{\text{elec}}(\text{M06/BS1}) = -1638.51676575 \text{ au}$   
 $H_{\text{corr}}(\text{M06/BS1}) = 0.552449 \text{ au}$   
 $G_{\text{corr}}(\text{M06/BS1}) = 0.451755 \text{ au}$   
 $\text{SPE}(\text{M06/BS2//M06/BS1}) = -1638.39710834 \text{ au}$

0 1

|   |             |             |             |
|---|-------------|-------------|-------------|
| V | 0.65111300  | 0.67831200  | -0.80207100 |
| O | 0.97277300  | 0.12592500  | -2.24527300 |
| N | -0.03233600 | -0.80581600 | 0.27086400  |
| N | -1.09646200 | 0.02700400  | -0.15523000 |
| N | 0.97324900  | -2.87379800 | -0.38452600 |
| N | -1.20597400 | -2.77911000 | -0.52064000 |
| C | -0.10004700 | -2.06373600 | -0.18674500 |
| C | 0.53217300  | -4.10035400 | -0.87690500 |
| H | 1.23201700  | -4.89407600 | -1.09729700 |
| C | -0.81117500 | -4.04311700 | -0.95862500 |
| H | -1.54453900 | -4.77570700 | -1.26499800 |
| C | 2.34259900  | -2.52409000 | -0.17337400 |
| C | 3.24279100  | -2.68598200 | -1.22257300 |
| C | 4.58576700  | -2.39138600 | -1.01407600 |
| H | 5.29675900  | -2.51612800 | -1.82814300 |
| C | 5.01460800  | -1.92968000 | 0.22727500  |
| C | 4.10192100  | -1.76416800 | 1.26547100  |
| H | 4.43516100  | -1.39236100 | 2.23228000  |
| C | 2.75938400  | -2.06607200 | 1.07254800  |
| C | -2.57543700 | -2.40643000 | -0.30578900 |
| C | -3.05148800 | -2.30506500 | 0.99622300  |
| C | -4.38644400 | -1.97552900 | 1.20520100  |
| H | -4.76428400 | -1.88087600 | 2.22130600  |
| C | -5.23208600 | -1.76894600 | 0.11934400  |
| C | -4.74474000 | -1.89038500 | -1.18100200 |
| H | -5.40572000 | -1.72795200 | -2.02978400 |
| C | -3.40984600 | -2.21152300 | -1.40050300 |
| C | -1.79014400 | 0.65348600  | 0.89347400  |
| C | -1.53448800 | 0.42738900  | 2.25157400  |
| C | -2.31744600 | 1.04477100  | 3.22484400  |
| H | -2.10980400 | 0.85143900  | 4.27717400  |
| C | -3.35807600 | 1.89451400  | 2.86542500  |
| C | -3.61148000 | 2.12390400  | 1.51099700  |
| H | -4.42640100 | 2.78314600  | 1.21393400  |
| C | -2.84219100 | 1.51079600  | 0.53489200  |
| C | -0.25203400 | 2.47397600  | -1.16655000 |
| C | -0.83144900 | 2.78400400  | -2.40648500 |
| C | -1.45281200 | 4.01169700  | -2.62718800 |



|   |             |             |             |
|---|-------------|-------------|-------------|
| H | -1.90273200 | 4.22673700  | -3.59659100 |
| C | -1.50000800 | 4.96371000  | -1.61093600 |
| C | -0.92045000 | 4.68274200  | -0.37587100 |
| H | -0.94948200 | 5.42404100  | 0.42267100  |
| C | -0.31320500 | 3.44790500  | -0.15696200 |
| C | 2.36244000  | 1.18933600  | 0.15166100  |
| C | 3.59435700  | 1.29542000  | -0.51737100 |
| C | 4.74978700  | 1.68850600  | 0.15428400  |
| H | 5.69597100  | 1.76219000  | -0.38162700 |
| C | 4.69630100  | 1.98259700  | 1.51462400  |
| C | 3.48771900  | 1.87920000  | 2.20479600  |
| H | 3.44727100  | 2.10613400  | 3.26986800  |
| C | 2.33907700  | 1.48302400  | 1.52765900  |
| H | 0.11873000  | 3.24663900  | 0.82741500  |
| H | -1.98492500 | 5.92425800  | -1.78177500 |
| H | -0.80836500 | 2.04680200  | -3.21065600 |
| H | -3.96914000 | 2.37227900  | 3.62931800  |
| H | -3.04114700 | 1.67987800  | -0.52382600 |
| H | -0.72761400 | -0.24817600 | 2.53436600  |
| H | -2.37671700 | -2.47247800 | 1.83412400  |
| H | -6.27666200 | -1.51302300 | 0.28558700  |
| H | -3.00446600 | -2.29601600 | -2.40744400 |
| H | 1.40172600  | 1.39651500  | 2.08690500  |
| H | 5.59868000  | 2.28934900  | 2.04240200  |
| H | 3.65239000  | 1.05500900  | -1.58037100 |
| H | 2.88502000  | -3.02823600 | -2.19265900 |
| H | 6.06476300  | -1.69099400 | 0.38552000  |
| H | 2.03597700  | -1.94242300 | 1.87636400  |

**Cartesian coordinates, electronic energies ( $E_{\text{elec}}$ ), thermal corrections to enthalpies ( $H_{\text{corr}}$ ) and Gibbs ( $G_{\text{corr}}$ ) energies and single-point energies (SPE) for 2, TSB2, 3, 2<sub>p</sub>, TSB2<sub>p</sub> & 3<sub>p</sub> (singlet) in Solvent = toluene**

2\_S

$E_{\text{elec}}$  (M06/BS1) = -680.57058441 au

$H_{\text{corr}}$  (M06/BS1) = 0.271027 au

$G_{\text{corr}}$  (M06/BS1) = 0.208182 au

SPE (M06/BS2//M06/BS1) = -680.19250772 au

0 1

|   |            |             |            |
|---|------------|-------------|------------|
| V | 6.07521600 | 1.05603900  | 5.76444300 |
| O | 4.64776600 | 0.41688400  | 6.01077700 |
| N | 5.78558100 | 2.88596800  | 5.13443000 |
| N | 6.18944100 | 2.02342600  | 4.07731600 |
| N | 3.86378200 | 3.88216600  | 6.09503500 |
| N | 3.77991000 | 3.60427000  | 3.93220400 |
| C | 4.54850300 | 3.39478800  | 5.03084000 |
| C | 2.64940300 | 4.39102100  | 5.66453000 |
| H | 1.94097600 | 4.82062000  | 6.35878000 |
| C | 2.59829200 | 4.22134300  | 4.32709100 |
| H | 1.83517700 | 4.47701400  | 3.60550300 |
| C | 7.15406700 | 1.29353000  | 7.48356600 |
| H | 8.10590600 | 1.78875300  | 7.23817600 |
| H | 6.62917000 | 1.88610300  | 8.24573100 |
| H | 7.36337800 | 0.29846900  | 7.90484600 |
| C | 7.19862700 | -0.40998800 | 4.88442700 |
| H | 6.84196100 | -0.71155800 | 3.89303100 |
| H | 8.23987700 | -0.06221200 | 4.81247800 |
| H | 7.14986600 | -1.27219700 | 5.56763300 |
| C | 7.51899300 | 2.39925700  | 3.62508300 |
| H | 7.89777600 | 1.60171100  | 2.97538900 |
| H | 7.47794200 | 3.33150100  | 3.03671700 |
| H | 8.24520300 | 2.56251900  | 4.44430200 |
| C | 4.33541400 | 3.82259600  | 7.46436500 |
| H | 3.73758300 | 4.51295100  | 8.06527300 |
| H | 4.23527400 | 2.80709900  | 7.86450800 |
| H | 5.38751700 | 4.12110300  | 7.50407900 |
| C | 4.12264400 | 3.32174600  | 2.54457200 |
| H | 5.11150900 | 3.72567600  | 2.31063900 |
| H | 4.12455200 | 2.24735100  | 2.35410900 |
| H | 3.37465600 | 3.81613200  | 1.91714500 |

## TSB2\_S

$E_{\text{elec}}(\text{M06/BS1}) = -680.51194402 \text{ au}$

$H_{\text{corr}}(\text{M06/BS1}) = 0.268651 \text{ au}$

$G_{\text{corr}}(\text{M06/BS1}) = 0.205637 \text{ au}$

$\text{SPE}(\text{M06/BS2//M06/BS1}) = -680.13494843 \text{ au}$

0 1

|   |             |             |             |
|---|-------------|-------------|-------------|
| C | 3.62531800  | -0.25205200 | 0.00996200  |
| C | 3.30730700  | 1.05887600  | 0.10583400  |
| C | 1.38123000  | -0.07437200 | -0.20065600 |
| N | 2.44266000  | -0.95255100 | -0.14942200 |
| H | 4.58278200  | -0.75365700 | 0.03947100  |
| H | 3.93226700  | 1.92792600  | 0.25994000  |
| N | 1.93648600  | 1.17422800  | -0.04179300 |
| C | 2.29549100  | -2.38045700 | -0.30667700 |
| H | 1.33964200  | -2.68305500 | 0.13431600  |
| H | 2.29813600  | -2.67049800 | -1.36436700 |
| H | 3.11783000  | -2.88447900 | 0.21004700  |
| C | 1.17069000  | 2.40148300  | 0.02544900  |
| H | 0.72150300  | 2.52561100  | 1.01831800  |
| H | 1.83841900  | 3.24068800  | -0.18919800 |
| H | 0.36267700  | 2.36951200  | -0.71190400 |
| N | 0.14428400  | -0.43231500 | -0.38342600 |
| N | -0.97044100 | 0.25188000  | 1.25706000  |
| O | -1.81830300 | 1.53433100  | -1.15208600 |
| V | -1.64187000 | 0.13730400  | -0.41656300 |
| C | -2.68666000 | -1.35497100 | -1.36189200 |
| H | -2.61357700 | -2.28077400 | -0.77179700 |
| H | -3.74371000 | -1.10654000 | -1.52037500 |
| H | -2.20724200 | -1.51611800 | -2.34044500 |
| C | -3.29064000 | 0.17977500  | 1.02125100  |
| H | -3.52413100 | -0.85922900 | 1.27984000  |
| H | -3.21595000 | 0.80402800  | 1.91612200  |
| H | -4.03655200 | 0.60135000  | 0.33658100  |
| C | -0.81865900 | -0.86406000 | 2.13423700  |
| H | -1.13531400 | -1.83937300 | 1.72459300  |
| H | 0.23061200  | -0.92707700 | 2.46387500  |
| H | -1.40230100 | -0.64413900 | 3.04284200  |

### 3\_S

$E_{\text{elec}}(\text{M06/BS1}) = -680.64966776 \text{ au}$

$H_{\text{corr}}(\text{M06/BS1}) = 0.274214 \text{ au}$

$G_{\text{corr}}(\text{M06/BS1}) = 0.209239 \text{ au}$

$\text{SPE}(\text{M06/BS2//M06/BS1}) = -680.27044765 \text{ au}$

0 1

|   |             |             |            |
|---|-------------|-------------|------------|
| V | 4.95831000  | 2.51023900  | 5.33324800 |
| O | 5.37995100  | 2.30272200  | 6.84789600 |
| N | 6.08502900  | 3.50828600  | 4.39204100 |
| N | 3.21769200  | 3.07749500  | 5.22671900 |
| N | 7.36659500  | 5.26540400  | 5.41386200 |
| N | 8.42769400  | 3.88365300  | 4.09940200 |
| C | 7.19406000  | 4.15419800  | 4.63031600 |
| C | 8.69638800  | 5.66044300  | 5.38079100 |
| H | 9.04410900  | 6.52107500  | 5.93556500 |
| C | 9.35393700  | 4.80358400  | 4.56944200 |
| H | 10.39299600 | 4.76372300  | 4.27284700 |
| C | 2.24261800  | 3.19238900  | 6.28592900 |
| H | 2.65954400  | 2.82773900  | 7.22986900 |
| H | 1.92528400  | 4.24167800  | 6.42105400 |
| H | 1.33914900  | 2.60398000  | 6.05099700 |
| C | 2.72970600  | 3.56955400  | 3.95560800 |
| H | 1.83459200  | 3.00848900  | 3.63730900 |
| H | 2.45490600  | 4.63767200  | 4.01853100 |
| H | 3.49496400  | 3.46123900  | 3.17646100 |
| C | 4.96710000  | 0.66471200  | 4.44932300 |
| H | 4.61082100  | 0.77886600  | 3.41479200 |
| H | 5.98535500  | 0.25282200  | 4.43435500 |
| H | 4.30541600  | -0.02518400 | 4.98862400 |
| C | 8.68060400  | 2.73405200  | 3.26126600 |
| H | 8.68601700  | 1.81142200  | 3.85500900 |
| H | 7.89470100  | 2.65456400  | 2.50318900 |
| H | 9.65076200  | 2.85741800  | 2.77182600 |
| C | 6.29774500  | 5.86479500  | 6.18083000 |
| H | 5.38825800  | 5.89653800  | 5.57008400 |
| H | 6.08855600  | 5.28315500  | 7.08654200 |
| H | 6.58678500  | 6.88302600  | 6.45662100 |

## 2\_Sp

$E_{\text{elec}}(\text{M06/BS1}) = -1638.50822457 \text{ au}$

$H_{\text{corr}}(\text{M06/BS1}) = 0.552404 \text{ au}$

$G_{\text{corr}}(\text{M06/BS1}) = 0.453434 \text{ au}$

$\text{SPE}(\text{M06/BS2//M06/BS1}) = -1638.38957440 \text{ au}$

0 1

|   |             |             |             |
|---|-------------|-------------|-------------|
| V | 0.62998900  | 0.68083200  | -0.81154500 |
| O | 0.91316600  | 0.08274200  | -2.24119100 |
| N | -0.01252500 | -0.80296700 | 0.31549300  |
| N | -1.08431100 | 0.02890200  | -0.09854400 |
| N | 0.98677300  | -2.86111700 | -0.37271100 |
| N | -1.19144800 | -2.75175800 | -0.53015300 |
| C | -0.08507500 | -2.04809300 | -0.16742400 |
| C | 0.54440300  | -4.07257800 | -0.89955400 |
| H | 1.24252500  | -4.86524700 | -1.12905600 |
| C | -0.79743300 | -4.00650400 | -0.99416300 |
| H | -1.53138200 | -4.72794200 | -1.32486500 |
| C | 2.35547700  | -2.51919000 | -0.15194300 |
| C | 3.26300100  | -2.68895900 | -1.19330200 |
| C | 4.60638300  | -2.40503400 | -0.97488500 |
| H | 5.32225300  | -2.53361800 | -1.78418800 |
| C | 5.02916700  | -1.94547600 | 0.26885500  |
| C | 4.10900100  | -1.76793600 | 1.29815600  |
| H | 4.43773000  | -1.39624900 | 2.26643000  |
| C | 2.76550600  | -2.05663700 | 1.09441700  |
| C | -2.56124400 | -2.37284800 | -0.33284500 |
| C | -3.05612400 | -2.27323100 | 0.96205500  |
| C | -4.38949900 | -1.92886600 | 1.15320100  |
| H | -4.77838400 | -1.82607900 | 2.16434000  |
| C | -5.21759200 | -1.71155100 | 0.05639800  |
| C | -4.71330400 | -1.83526300 | -1.23668500 |
| H | -5.35956500 | -1.66104700 | -2.09455800 |
| C | -3.37860100 | -2.16720700 | -1.43826600 |
| C | -1.76741200 | 0.65275200  | 0.95692100  |
| C | -1.51003900 | 0.40798400  | 2.31143100  |
| C | -2.28950300 | 1.01416300  | 3.29445000  |
| H | -2.08010500 | 0.80648100  | 4.34386200  |
| C | -3.32615300 | 1.87336600  | 2.94872100  |
| C | -3.57897600 | 2.12363000  | 1.59806200  |
| H | -4.38937800 | 2.79278200  | 1.31098500  |
| C | -2.81606500 | 1.52008300  | 0.61171900  |
| C | -0.28767200 | 2.45843500  | -1.18704600 |
| C | -0.88942000 | 2.74036600  | -2.42309200 |
| C | -1.52064100 | 3.95999100  | -2.65546200 |

|   |             |             |             |
|---|-------------|-------------|-------------|
| H | -1.98689600 | 4.15589100  | -3.62128300 |
| C | -1.55605500 | 4.92950300  | -1.65550900 |
| C | -0.95607200 | 4.67497800  | -0.42499900 |
| H | -0.97797000 | 5.43021700  | 0.36050300  |
| C | -0.33823800 | 3.44839300  | -0.19303700 |
| C | 2.35804800  | 1.15318300  | 0.12840300  |
| C | 3.58988500  | 1.26321700  | -0.53776400 |
| C | 4.73950200  | 1.66829300  | 0.13658500  |
| H | 5.68712400  | 1.74741000  | -0.39631800 |
| C | 4.67885000  | 1.97077500  | 1.49472700  |
| C | 3.46908300  | 1.86248900  | 2.18137400  |
| H | 3.42264400  | 2.09718700  | 3.24471900  |
| C | 2.32644000  | 1.45213100  | 1.50237100  |
| H | 0.10757200  | 3.26671500  | 0.78868000  |
| H | -2.04923500 | 5.88424400  | -1.83585800 |
| H | -0.87284800 | 1.98727800  | -3.21214800 |
| H | -3.93310800 | 2.34458000  | 3.72001800  |
| H | -3.01511800 | 1.70432400  | -0.44432300 |
| H | -0.70322100 | -0.27285400 | 2.58225300  |
| H | -2.39459200 | -2.44525200 | 1.80952100  |
| H | -6.26092600 | -1.44204900 | 0.20856000  |
| H | -2.95738600 | -2.24401700 | -2.43936400 |
| H | 1.38661100  | 1.35809100  | 2.05655600  |
| H | 5.57697200  | 2.28899600  | 2.02339600  |
| H | 3.65200300  | 1.01818500  | -1.59939100 |
| H | 2.90886100  | -3.02212600 | -2.16780600 |
| H | 6.07978000  | -1.71447400 | 0.43550100  |
| H | 2.03347300  | -1.91342200 | 1.88713300  |

## TSB2\_Sp

$E_{\text{elec}}$  (M06/BS1) = -1638.45039939 au  
 $H_{\text{corr}}$  (M06/BS1) = 0.549981 au  
 $G_{\text{corr}}$  (M06/BS1) = 0.449370 au  
SPE (M06/BS2//M06/BS1) = -1638.32907965 au

0 1

|   |            |             |             |
|---|------------|-------------|-------------|
| V | 5.83815900 | 0.59093000  | 5.34541500  |
| O | 4.81992800 | -0.52169200 | 4.87173400  |
| N | 5.01225400 | 2.27357300  | 5.42688100  |
| N | 6.40398500 | 1.71397000  | 3.97608600  |
| N | 4.37304600 | 4.54641300  | 5.68853200  |
| N | 3.76557800 | 3.58538700  | 3.80367300  |
| C | 4.42994500 | 3.33983700  | 4.99837300  |
| C | 3.68126900 | 5.48688500  | 4.93728800  |
| H | 3.45847700 | 6.46910200  | 5.33033200  |
| C | 3.33043400 | 4.90358500  | 3.77376600  |
| H | 2.75909200 | 5.28394900  | 2.93840100  |
| C | 5.00524700 | 4.80191000  | 6.93178300  |
| C | 4.96738100 | 3.85892900  | 7.95651700  |
| C | 5.60904000 | 4.13779500  | 9.15936100  |
| H | 5.58826400 | 3.39225500  | 9.95227300  |
| C | 6.26807600 | 5.34842500  | 9.34637200  |
| C | 6.29714900 | 6.28689900  | 8.31705900  |
| H | 6.81903100 | 7.23254100  | 8.45140800  |
| C | 5.67380500 | 6.01516600  | 7.10602200  |
| C | 3.63281200 | 2.67071100  | 2.72306700  |
| C | 3.92926800 | 3.10717700  | 1.43298900  |
| C | 3.80201300 | 2.22517000  | 0.36671300  |
| H | 4.03335800 | 2.56257500  | -0.64190600 |
| C | 3.39995200 | 0.91093200  | 0.59240700  |
| C | 3.11015900 | 0.48589600  | 1.88559000  |
| H | 2.80497700 | -0.54175100 | 2.07192200  |
| C | 3.21143700 | 1.36545500  | 2.95624200  |
| C | 7.19636700 | 2.79070400  | 3.75521300  |
| C | 7.77002200 | 3.58677800  | 4.78202100  |
| C | 8.58174800 | 4.65803500  | 4.46497800  |
| H | 9.00181100 | 5.27526100  | 5.25729900  |
| C | 8.88051800 | 4.93917800  | 3.12695300  |
| C | 8.33745200 | 4.16670100  | 2.10205800  |
| H | 8.57037300 | 4.39646800  | 1.06407100  |
| C | 7.47390800 | 3.12614000  | 2.40842500  |
| C | 7.68747100 | -0.30656000 | 4.84177200  |
| C | 7.67922600 | -1.56840700 | 4.23314500  |
| C | 8.87148900 | -2.24487800 | 3.97337600  |

|   |             |             |             |
|---|-------------|-------------|-------------|
| H | 8.84143600  | -3.23098100 | 3.50897800  |
| C | 10.09365000 | -1.66629300 | 4.30068800  |
| C | 10.11803500 | -0.40364300 | 4.89000100  |
| H | 11.06986100 | 0.06080600  | 5.14888500  |
| C | 8.92605500  | 0.26885800  | 5.14476900  |
| C | 6.31131800  | 0.16846800  | 7.29444800  |
| C | 5.94008200  | -1.05047300 | 7.88791900  |
| C | 6.22681100  | -1.32562000 | 9.22311500  |
| H | 5.92535000  | -2.27806000 | 9.65921800  |
| C | 6.90171600  | -0.38717200 | 10.00009300 |
| C | 7.28724400  | 0.82616000  | 9.43424100  |
| H | 7.81649600  | 1.56713400  | 10.03499800 |
| C | 6.99359800  | 1.09406200  | 8.09944800  |
| H | 8.97349700  | 1.25880300  | 5.60740400  |
| H | 6.73103200  | -2.03562600 | 3.96678100  |
| H | 3.31628700  | 0.21622400  | -0.24109500 |
| H | 2.99792300  | 1.02886500  | 3.96723200  |
| H | 4.28349400  | 4.12570600  | 1.27586200  |
| H | 7.52022100  | 3.36298900  | 5.81934800  |
| H | 9.53484700  | 5.77509100  | 2.88516400  |
| H | 7.00447400  | 2.52257100  | 1.63309400  |
| H | 11.02459900 | -2.19299900 | 4.09347500  |
| H | 5.72736400  | 6.72457200  | 6.28114600  |
| H | 4.45073600  | 2.91328000  | 7.81067800  |
| H | 6.76297000  | 5.56048100  | 10.29214900 |
| H | 7.30065700  | 2.05929800  | 7.68581100  |
| H | 7.12930200  | -0.60149000 | 11.04388800 |
| H | 5.42020300  | -1.80028500 | 7.28939400  |



### 3\_Sp

$E_{\text{elec}}(\text{M06/BS1}) = -1638.59203532 \text{ au}$

$H_{\text{corr}}(\text{M06/BS1}) = 0.553772 \text{ au}$

$G_{\text{corr}}(\text{M06/BS1}) = 0.453844 \text{ au}$

$\text{SPE}(\text{M06/BS2//M06/BS1}) = -1638.47170318 \text{ au}$

0 1

|   |             |             |            |
|---|-------------|-------------|------------|
| V | 4.89675900  | 2.22463200  | 5.35061300 |
| O | 5.45942400  | 1.77072400  | 6.75656900 |
| N | 6.00682000  | 3.33884400  | 4.56041900 |
| N | 3.14693700  | 2.89310800  | 5.51323100 |
| N | 7.17037600  | 5.24612300  | 5.42965100 |
| N | 8.34152600  | 3.80824800  | 4.25878200 |
| C | 7.07818100  | 4.04072500  | 4.76148600 |
| C | 8.45780300  | 5.75993600  | 5.29618200 |
| H | 8.74080800  | 6.68791400  | 5.77367500 |
| C | 9.17797600  | 4.87587500  | 4.57927800 |
| H | 10.22396000 | 4.86941200  | 4.30594600 |
| C | 6.06104800  | 5.92979600  | 6.00235200 |
| C | 5.29298300  | 5.31625100  | 6.98986100 |
| C | 5.75065400  | 7.20987500  | 5.54804600 |
| C | 4.18794900  | 5.98585100  | 7.50564100 |
| H | 5.55574600  | 4.31956000  | 7.34325900 |
| C | 4.65394000  | 7.87773900  | 6.08307200 |
| H | 6.35807400  | 7.66524500  | 4.76679300 |
| C | 3.86614500  | 7.26274800  | 7.05270300 |
| H | 3.57272200  | 5.50006600  | 8.26168100 |
| H | 4.40737700  | 8.87700200  | 5.72916800 |
| H | 2.99875700  | 7.77979200  | 7.45892100 |
| C | 8.69681300  | 2.69715200  | 3.44558200 |
| C | 8.32289700  | 1.40893300  | 3.82064500 |
| C | 9.42493600  | 2.91686500  | 2.27845300 |
| C | 8.66152400  | 0.33785200  | 3.00292900 |
| H | 7.76747300  | 1.24961800  | 4.74208700 |
| C | 9.78227400  | 1.83472200  | 1.48192400 |
| H | 9.69092400  | 3.93309400  | 1.99037700 |
| C | 9.39400600  | 0.54603600  | 1.83721700 |
| H | 8.34369700  | -0.66497600 | 3.28363900 |
| H | 10.35191800 | 2.00442300  | 0.57020000 |
| H | 9.66153300  | -0.29766000 | 1.20393200 |
| C | 2.35011900  | 3.16732500  | 6.63810400 |
| C | 1.29758100  | 4.09535200  | 6.58443700 |
| C | 2.61390400  | 2.53016100  | 7.86240300 |
| C | 0.55342800  | 4.38749500  | 7.72220200 |
| H | 1.06959100  | 4.60038600  | 5.64781100 |

|   |             |             |            |
|---|-------------|-------------|------------|
| C | 1.86626200  | 2.83240500  | 8.99128800 |
| H | 3.42082800  | 1.80151100  | 7.91338600 |
| C | 0.83176300  | 3.76589700  | 8.93505500 |
| H | -0.25404300 | 5.11567100  | 7.65350200 |
| H | 2.09214200  | 2.32432500  | 9.92806100 |
| H | 0.24638800  | 3.99756200  | 9.82299900 |
| C | 2.69059900  | 3.37376900  | 4.24577000 |
| C | 1.84675100  | 2.56882600  | 3.47660500 |
| C | 3.08974600  | 4.62239500  | 3.76144500 |
| C | 1.41496800  | 3.00262600  | 2.22821200 |
| H | 1.55271800  | 1.59571100  | 3.86927800 |
| C | 2.65685600  | 5.05044900  | 2.51124200 |
| H | 3.74743700  | 5.23994400  | 4.37473400 |
| C | 1.82310400  | 4.24210700  | 1.74178600 |
| H | 0.76422400  | 2.36701200  | 1.62988400 |
| H | 2.97426700  | 6.02168300  | 2.13473800 |
| H | 1.49000700  | 4.58006400  | 0.76181900 |
| C | 4.88532600  | 0.54914200  | 4.20150000 |
| C | 5.07665700  | -0.74068300 | 4.71855400 |
| C | 4.72579800  | 0.68407400  | 2.81216400 |
| C | 5.09874800  | -1.85638800 | 3.88237000 |
| H | 5.21543200  | -0.87480800 | 5.79235900 |
| C | 4.74645600  | -0.42660900 | 1.97367400 |
| H | 4.59284300  | 1.67664400  | 2.37291600 |
| C | 4.93315300  | -1.70010500 | 2.50862500 |
| H | 5.24665100  | -2.85020900 | 4.30512600 |
| H | 4.62386000  | -0.29951800 | 0.89815900 |
| H | 4.95285700  | -2.57044300 | 1.85348800 |

**Cartesian coordinates, electronic energies ( $E_{\text{elec}}$ ), thermal corrections to enthalpies ( $H_{\text{corr}}$ ) and Gibbs ( $G_{\text{corr}}$ ) energies and single-point energies (SPE) for TS7c, TS8c & TS11c (triplet) in Solvent = THF**

**TS7c\_T**

$E_{\text{elec}}$  (M06/BS1) = -680.42917888 au

$H_{\text{corr}}$  (M06/BS1) = 0.263908 au

$G_{\text{corr}}$  (M06/BS1) = 0.195048 au

SPE (M06/BS2//M06/BS1) = -680.05831562 au

0 3

|   |             |             |             |
|---|-------------|-------------|-------------|
| C | -0.00963700 | 0.01549900  | -0.04100700 |
| C | -0.04244100 | -0.05702200 | 1.30252700  |
| C | 2.12370800  | -0.01667000 | 0.68513300  |
| N | 1.32628400  | 0.04218000  | -0.42412200 |
| H | -0.80507600 | 0.05487300  | -0.77211000 |
| H | -0.87285000 | -0.09349000 | 1.99378500  |
| N | 1.27687600  | -0.07481400 | 1.76349200  |
| C | 1.85315900  | 0.11712300  | -1.76647100 |
| H | 2.47184700  | 1.01407800  | -1.88545800 |
| H | 2.46894800  | -0.76251400 | -1.98764900 |
| H | 1.01603000  | 0.15887200  | -2.46793200 |
| C | 1.65607600  | -0.14568900 | 3.16116800  |
| H | 2.28438400  | 0.70557600  | 3.44155800  |
| H | 0.74068400  | -0.12161500 | 3.75967800  |
| H | 2.19398700  | -1.07721100 | 3.37963400  |
| N | 3.43307600  | 0.00427200  | 0.59086000  |
| N | 4.18110500  | -0.00092000 | 1.70661000  |
| O | 4.48693000  | -1.31043500 | 2.03510600  |
| V | 5.40390800  | -1.58828900 | 3.54932900  |
| C | 5.28959300  | -0.20848900 | 5.00602800  |
| H | 5.99679600  | -0.39863500 | 5.82635300  |
| H | 5.54751800  | 0.74080100  | 4.50833600  |
| H | 4.26482300  | -0.13948600 | 5.40110800  |
| C | 7.33073200  | -1.63924800 | 2.97145700  |
| H | 7.89935800  | -1.82558800 | 3.89729800  |
| H | 7.52291600  | -2.44966400 | 2.25465000  |
| H | 7.64201900  | -0.67662900 | 2.53943100  |
| C | 4.91987700  | -3.34658000 | 4.39125100  |
| H | 5.60707500  | -3.56469700 | 5.22229000  |
| H | 3.88024800  | -3.35779400 | 4.75094600  |
| H | 5.04307700  | -4.11238600 | 3.60925500  |

## TS8c\_T

$E_{\text{elec}}(\text{M06/BS1}) = -680.43611321 \text{ au}$

$H_{\text{corr}}(\text{M06/BS1}) = 0.264681 \text{ au}$

$G_{\text{corr}}(\text{M06/BS1}) = 0.196649 \text{ au}$

$\text{SPE}(\text{M06/BS2//M06/BS1}) = -680.06439847 \text{ au}$

0 3

|   |             |             |             |
|---|-------------|-------------|-------------|
| C | 0.27706200  | 0.95088300  | -0.14755100 |
| C | 0.33337200  | 1.22482400  | 1.16914700  |
| C | 2.14908900  | 0.00299100  | 0.65917800  |
| N | 1.40095700  | 0.19580300  | -0.46395600 |
| H | -0.44870000 | 1.22002300  | -0.90196800 |
| H | -0.33443900 | 1.78365200  | 1.80984400  |
| N | 1.49692100  | 0.64210100  | 1.67775200  |
| C | 1.76852700  | -0.32727100 | -1.76059800 |
| H | 2.75180700  | 0.05209100  | -2.06059200 |
| H | 1.80733500  | -1.42222700 | -1.73648900 |
| H | 1.01941600  | -0.00672100 | -2.48885600 |
| C | 1.88500300  | 0.66722400  | 3.07643800  |
| H | 2.87545800  | 1.11661200  | 3.20316900  |
| H | 1.15144500  | 1.27276800  | 3.61572000  |
| H | 1.89084000  | -0.34196500 | 3.50318000  |
| N | 3.26016800  | -0.70792700 | 0.62713800  |
| N | 3.96009500  | -0.82433200 | 1.77225600  |
| O | 4.97774800  | 0.00933300  | 1.95326900  |
| V | 5.45083900  | -1.76420500 | 2.61815900  |
| C | 5.29309200  | -2.10764700 | 4.59173500  |
| H | 5.89115400  | -2.98849300 | 4.87225600  |
| H | 5.64234700  | -1.23123700 | 5.15756700  |
| H | 4.23348000  | -2.29536700 | 4.82540100  |
| C | 7.41204900  | -1.51882500 | 2.15388400  |
| H | 7.96157600  | -2.37900900 | 2.57135000  |
| H | 7.52369200  | -1.52704500 | 1.05944200  |
| H | 7.82502700  | -0.58139000 | 2.55398200  |
| C | 5.01561200  | -3.47950100 | 1.63179300  |
| H | 5.71280800  | -4.24102400 | 2.02019000  |
| H | 3.97738200  | -3.81082200 | 1.77565700  |
| H | 5.20415300  | -3.34357000 | 0.55597700  |

## TS11c\_T

$E_{\text{elec}}(\text{M06/BS1}) = -680.43088695 \text{ au}$

$H_{\text{corr}}(\text{M06/BS1}) = 0.265221 \text{ au}$

$G_{\text{corr}}(\text{M06/BS1}) = 0.199701 \text{ au}$

$\text{SPE}(\text{M06/BS2//M06/BS1}) = -680.06361863 \text{ au}$

0 3

|   |             |             |             |
|---|-------------|-------------|-------------|
| C | -4.59856900 | -0.45112900 | -0.62250000 |
| C | -4.25930300 | 0.82023400  | -0.90787700 |
| C | -2.42789600 | -0.19326600 | -0.08687600 |
| N | -3.46781100 | -1.07648000 | -0.11457500 |
| H | -5.53385100 | -0.98161800 | -0.73404400 |
| H | -4.83469100 | 1.63630500  | -1.32197400 |
| N | -2.91149200 | 0.98652700  | -0.58350600 |
| C | -3.36655000 | -2.43034200 | 0.38337600  |
| H | -2.61684200 | -2.99349500 | -0.18281400 |
| H | -3.07615000 | -2.42415000 | 1.44078800  |
| H | -4.34125000 | -2.91266300 | 0.27575400  |
| C | -2.19061100 | 2.23660700  | -0.75147000 |
| H | -1.22877800 | 2.05923200  | -1.24096600 |
| H | -2.80067600 | 2.89488600  | -1.37590500 |
| H | -2.01564900 | 2.72826800  | 0.21374400  |
| N | -1.24925000 | -0.55955300 | 0.38906300  |
| N | -0.28646700 | 0.41611800  | 0.56852300  |
| O | 0.45702800  | 0.74461900  | -0.37895100 |
| V | -0.30349600 | 0.91520300  | 2.39662200  |
| C | 0.83076700  | -0.55226700 | 3.19255600  |
| C | -2.16269500 | 0.96363600  | 3.20100400  |
| C | 0.55957100  | 2.69439200  | 2.78763700  |
| H | 0.81556300  | -0.36925400 | 4.28066600  |
| H | 0.41030800  | -1.54740600 | 2.98583800  |
| H | 1.87001900  | -0.50729800 | 2.83433300  |
| H | -2.09883600 | 1.23054200  | 4.26750600  |
| H | -2.82163200 | 1.68142900  | 2.68703900  |
| H | -2.59215100 | -0.04637400 | 3.10641200  |
| H | 0.63680900  | 2.89705900  | 3.86641500  |
| H | 1.57452100  | 2.62229600  | 2.36150300  |
| H | 0.02618900  | 3.52008500  | 2.29196000  |

**Cartesian coordinates, electronic energies ( $E_{\text{elec}}$ ), thermal corrections to enthalpies ( $H_{\text{corr}}$ ) and Gibbs ( $G_{\text{corr}}$ ) energies and single-point energies (SPE) for TS8c & TS9c (singlet) in Solvent = THF**

**TS8c\_S**

$E_{\text{elec}}$  (M06/BS1) = -680.44583483 au

$H_{\text{corr}}$  (M06/BS1) = 0.265524 au

$G_{\text{corr}}$  (M06/BS1) = 0.200851 au

SPE (M06/BS2//M06/BS1) = -680.07263101 au

0 1

|   |             |             |             |
|---|-------------|-------------|-------------|
| C | 0.03858600  | 0.08101500  | 0.10588200  |
| C | 0.23502900  | 0.16098100  | 1.43550300  |
| C | 2.24842100  | -0.10778800 | 0.47547000  |
| N | 1.28358700  | -0.08465900 | -0.48784800 |
| H | -0.86474500 | 0.12890300  | -0.48595300 |
| H | -0.46262600 | 0.29116200  | 2.25103300  |
| N | 1.60684600  | 0.05025500  | 1.67290100  |
| C | 1.56762900  | -0.22016500 | -1.89913400 |
| H | 2.24503900  | 0.57431100  | -2.23097900 |
| H | 2.03641800  | -1.18926100 | -2.10422300 |
| H | 0.62669500  | -0.14914100 | -2.45050900 |
| C | 2.20486400  | 0.02547700  | 2.99701900  |
| H | 3.02982600  | 0.74142900  | 3.06338900  |
| H | 1.43038300  | 0.30458000  | 3.71720500  |
| H | 2.57833000  | -0.97516800 | 3.24324300  |
| N | 3.52245700  | -0.27294100 | 0.15095500  |
| N | 4.38925500  | -0.25157800 | 1.19185700  |
| O | 5.00720400  | 0.92582200  | 1.54268300  |
| V | 6.02375700  | -0.67973600 | 1.70245700  |
| C | 7.48265100  | 0.56878900  | 2.37611300  |
| H | 8.36194100  | -0.09092200 | 2.47760000  |
| H | 7.70003400  | 1.39142200  | 1.68499900  |
| H | 7.21563600  | 0.96771300  | 3.36354200  |
| C | 6.76134700  | -1.53450300 | 0.05602500  |
| H | 7.80307800  | -1.84982400 | 0.22074200  |
| H | 6.13029800  | -2.41521700 | -0.14781900 |
| H | 6.70404000  | -0.84352100 | -0.79598300 |
| C | 5.97433200  | -1.88937700 | 3.31269400  |
| H | 7.00196300  | -2.17445500 | 3.58520300  |
| H | 5.51857600  | -1.33762100 | 4.14853200  |
| H | 5.37427300  | -2.78757200 | 3.10315300  |

## TS9c\_S

$E_{\text{elec}}$  (M06/BS1) = -680.46496442 au

$H_{\text{corr}}$  (M06/BS1) = 0.266653 au

$G_{\text{corr}}$  (M06/BS1) = 0.205321 au

SPE (M06/BS2//M06/BS1) = -680.09001881 au

0 1

|   |             |             |             |
|---|-------------|-------------|-------------|
| C | 0.04573200  | -0.05836900 | -0.01779200 |
| C | 0.00053800  | 0.20347400  | 1.30361200  |
| C | 2.15497500  | -0.03706500 | 0.74478400  |
| N | 1.38148700  | -0.21284200 | -0.36080500 |
| H | -0.73960800 | -0.16098700 | -0.75335100 |
| H | -0.83495400 | 0.38120700  | 1.96606900  |
| N | 1.30868300  | 0.22168200  | 1.78142000  |
| C | 1.91057700  | -0.54115400 | -1.66670900 |
| H | 2.44298900  | 0.31311800  | -2.10052100 |
| H | 2.60314100  | -1.38567400 | -1.58044300 |
| H | 1.07892600  | -0.81854400 | -2.31871300 |
| C | 1.67399900  | 0.59272400  | 3.14031200  |
| H | 2.49111000  | 1.31903400  | 3.12367800  |
| H | 0.79619200  | 1.04902300  | 3.60599500  |
| H | 1.98368500  | -0.28084700 | 3.71986300  |
| N | 3.47471700  | -0.10947700 | 0.72624000  |
| N | 4.10856800  | -0.36105300 | 1.97757600  |
| O | 4.94695600  | 0.72978700  | 2.18918600  |
| V | 5.47123400  | -0.21990500 | 0.69798100  |
| C | 7.13107400  | 0.97656300  | 0.79478700  |
| H | 7.89244100  | 0.59952800  | 0.09646000  |
| H | 6.83487200  | 1.98882200  | 0.48497000  |
| H | 7.52764400  | 1.01210800  | 1.81746700  |
| C | 5.43392300  | 0.16108900  | -1.32051300 |
| H | 6.46154700  | 0.10635000  | -1.70717900 |
| H | 4.79742400  | -0.56461900 | -1.84432100 |
| H | 5.03814000  | 1.17170900  | -1.49381300 |
| C | 6.34351000  | -2.00315200 | 0.96649700  |
| H | 7.14281400  | -2.10950700 | 0.21782100  |
| H | 6.75500900  | -2.09691100 | 1.97963400  |
| H | 5.56893800  | -2.76768100 | 0.80431700  |

**Cartesian coordinates, electronic energies ( $E_{\text{elec}}$ ), thermal corrections to enthalpies ( $H_{\text{corr}}$ ) and Gibbs ( $G_{\text{corr}}$ ) energies and single-point energies (SPE) for 8M, 9M & 8M<sub>P</sub> (singlet) in Solvent = THF**

**8M**

$E_{\text{elec}}$  (M06/BS1, triplet) = -680.4520571880 au

$E_{\text{elec}}$  (M06/BS1, singlet) = -680.4520529980 au

SPE (M06/BS2//M06/BS1, singlet) = -680.07828113 au

|   |            |            |            |
|---|------------|------------|------------|
| C | -4.2619373 | -0.8047453 | 0.2303566  |
| C | -4.1819078 | 0.5137184  | 0.5129176  |
| C | -2.1358647 | -0.1683652 | -0.0953641 |
| N | -3.0005098 | -1.2218482 | -0.1488488 |
| H | -5.0968999 | -1.4905172 | 0.2633159  |
| H | -4.9366674 | 1.2171429  | 0.8358317  |
| N | -2.8674844 | 0.9154349  | 0.3126260  |
| C | -2.6108118 | -2.5632300 | -0.5329110 |
| H | -2.1277434 | -2.5466361 | -1.5147072 |
| H | -1.9121775 | -2.9836395 | 0.1982498  |
| H | -3.5103735 | -3.1815499 | -0.5785832 |
| C | -2.4225477 | 2.2950145  | 0.4390480  |
| H | -1.8940820 | 2.6114903  | -0.4636058 |
| H | -3.3105623 | 2.9175495  | 0.5782448  |
| H | -1.7554033 | 2.4185155  | 1.2993510  |
| N | -0.8591455 | -0.3300631 | -0.4325674 |
| N | -0.1001460 | 0.7469840  | -0.2264061 |
| O | 1.1816081  | 0.5286536  | -0.6356339 |
| V | 1.3017207  | 1.0246895  | 1.1480677  |
| C | 1.8504237  | 2.9300073  | 1.4993219  |
| H | 2.1132107  | 3.0028351  | 2.5669877  |
| H | 2.7272042  | 3.2016852  | 0.8934389  |
| H | 1.0232031  | 3.6222711  | 1.2803950  |
| C | 2.9067493  | -0.1221730 | 1.6287041  |
| H | 3.2597652  | 0.1453763  | 2.6376526  |
| H | 2.6359962  | -1.1879162 | 1.6097417  |
| H | 3.7105178  | 0.0580206  | 0.8980902  |
| C | 0.0754976  | 0.3595995  | 2.6304437  |
| H | 0.6000661  | 0.5187237  | 3.5865698  |
| H | -0.9045412 | 0.8589092  | 2.6644751  |
| H | -0.0840706 | -0.7210622 | 2.4876202  |



## 9M

$E_{\text{elec}}(\text{M06/BS1, triplet}) = -680.4473542730 \text{ au}$

$E_{\text{elec}}(\text{M06/BS1, singlet}) = -680.4473364440 \text{ au}$

$\text{SPE}(\text{M06/BS2//M06/BS1, singlet}) = -680.07400673 \text{ au}$

|   |            |            |            |
|---|------------|------------|------------|
| C | -4.4225413 | 1.2309442  | -0.4658061 |
| C | -3.4384640 | 2.0138747  | 0.0329970  |
| C | -2.6726708 | -0.0817456 | -0.0070870 |
| N | -3.9443119 | -0.0618313 | -0.4891961 |
| H | -5.4191114 | 1.4715123  | -0.8092360 |
| H | -3.4000119 | 3.0801754  | 0.2068225  |
| N | -2.3536615 | 1.2023086  | 0.3208139  |
| C | -4.6840355 | -1.2264288 | -0.9451700 |
| H | -4.0089736 | -2.0844469 | -0.9475049 |
| H | -5.5237726 | -1.4239718 | -0.2708566 |
| H | -5.0590152 | -1.0471374 | -1.9572458 |
| C | -1.0916721 | 1.7044399  | 0.8534691  |
| H | -0.2680969 | 1.4562116  | 0.1799700  |
| H | -1.1813566 | 2.7904414  | 0.9385238  |
| H | -0.8894447 | 1.2727442  | 1.8371755  |
| N | -1.9799882 | -1.2321540 | 0.0505634  |
| N | -0.7862237 | -1.1392964 | 0.6514142  |
| O | -0.2569688 | -2.3912835 | 0.7182386  |
| V | -1.5679594 | -2.5469118 | 2.0488976  |
| C | -0.5669693 | -3.7984611 | 3.3073719  |
| H | -1.1901005 | -3.9990435 | 4.1923835  |
| H | -0.3278188 | -4.7510940 | 2.8094380  |
| H | 0.3679007  | -3.3219788 | 3.6378689  |
| C | -3.3200910 | -3.5522754 | 1.8261675  |
| H | -3.5301758 | -4.1302053 | 2.7384806  |
| H | -4.1468451 | -2.8485239 | 1.6482505  |
| H | -3.2462451 | -4.2410693 | 0.9707850  |
| C | -1.8441417 | -1.0833467 | 3.4475220  |
| H | -2.3738470 | -1.5288944 | 4.3053424  |
| H | -0.8696731 | -0.7081985 | 3.7975712  |
| H | -2.4378292 | -0.2420860 | 3.0534373  |

**8M<sub>P</sub>** $E_{\text{elec}}(\text{M06/BS1, triplet}) = -1638.37752157 \text{ au}$  $E_{\text{elec}}(\text{M06/BS1, singlet}) = -1638.37752187 \text{ au}$  $\text{SPE}(\text{M06/BS2//M06/BS1, singlet}) = -1638.26186146 \text{ au}$ 

|   |             |             |             |
|---|-------------|-------------|-------------|
| O | 1.24177940  | 0.46710790  | -1.30525640 |
| N | -1.88618550 | -1.58232900 | 0.63108160  |
| N | -3.12792760 | -0.23108830 | -0.57111890 |
| N | -0.83424940 | 0.25683370  | -0.65248320 |
| N | 0.34461610  | -0.34560390 | -0.71202510 |
| C | -1.83848670 | -0.49577710 | -0.19582260 |
| C | -3.20761570 | -2.01064210 | 0.72987230  |
| H | -3.47988350 | -2.83835280 | 1.36947580  |
| C | -3.96828400 | -1.18191250 | -0.01286600 |
| H | -5.03613690 | -1.15467110 | -0.17879340 |
| V | 1.02758430  | -0.97125450 | -2.52219600 |
| C | -0.83187990 | -2.13533770 | 1.42289990  |
| C | 0.03049200  | -1.30353920 | 2.13171020  |
| C | -0.73292680 | -3.51953750 | 1.51619030  |
| C | 1.02301340  | -1.87469820 | 2.91914780  |
| C | 0.25537960  | -4.07968000 | 2.31827760  |
| C | 1.13909020  | -3.26016440 | 3.01319440  |
| H | 1.70437010  | -1.23011490 | 3.47004780  |
| H | 0.33727510  | -5.16230250 | 2.39025050  |
| C | -3.52271120 | 0.72211700  | -1.55838710 |
| C | -3.13293470 | 2.05393050  | -1.44330170 |
| C | -4.31017880 | 0.29201740  | -2.62368030 |
| C | -3.53902390 | 2.96288980  | -2.41340110 |
| C | -4.72207660 | 1.21397030  | -3.58034080 |
| C | -4.33773390 | 2.54774980  | -3.47684970 |
| H | -3.23588720 | 4.00443860  | -2.32991520 |
| H | -5.33843250 | 0.88469970  | -4.41435430 |
| C | 0.41971880  | -0.03850710 | -4.19776880 |
| C | 0.80168130  | -0.42794680 | -5.49192200 |
| C | -0.52796450 | 0.99330550  | -4.07499360 |
| C | 0.25496700  | 0.18670910  | -6.61856870 |
| C | -1.08226210 | 1.60141560  | -5.19910380 |
| C | -0.69052700 | 1.19910300  | -6.47530150 |
| H | 0.57033050  | -0.12824040 | -7.61351240 |
| H | -1.82287110 | 2.39293590  | -5.07479690 |
| C | -0.47363210 | -2.37902460 | -2.49724970 |
| C | -0.18687300 | -3.56223250 | -1.79667230 |
| C | -1.72955410 | -2.29242330 | -3.12074050 |
| C | -1.08934250 | -4.62522660 | -1.74983470 |
| C | -2.65247990 | -3.33635150 | -3.05047070 |

|   |             |             |             |
|---|-------------|-------------|-------------|
| C | -2.33044820 | -4.51033860 | -2.37177680 |
| H | -0.82526750 | -5.54238640 | -1.22110880 |
| H | -3.62166360 | -3.24094530 | -3.54290200 |
| C | 2.75260390  | -1.95331150 | -2.88531070 |
| C | 2.85415660  | -3.06511990 | -3.74035460 |
| C | 3.94055910  | -1.42827860 | -2.34614270 |
| C | 4.08986060  | -3.62871410 | -4.04540600 |
| C | 5.18024120  | -1.99359680 | -2.64413410 |
| C | 5.25381020  | -3.09427590 | -3.49344080 |
| H | 4.15012910  | -4.48857960 | -4.71204110 |
| H | 6.09008610  | -1.57619220 | -2.21365900 |
| H | 6.22021310  | -3.54053530 | -3.72528890 |
| H | 3.89857540  | -0.56436440 | -1.67948280 |
| H | -1.11979500 | 1.67680600  | -7.35531510 |
| H | -2.51452710 | 2.36850110  | -0.60689750 |
| H | -0.85352450 | 1.31762940  | -3.08103560 |
| H | -4.65883520 | 3.26761710  | -4.22761210 |
| H | 1.53680760  | -1.22402580 | -5.63185480 |
| H | -1.99226340 | -1.39192390 | -3.68288290 |
| H | 0.76675380  | -3.66640850 | -1.26874280 |
| H | -3.04203260 | -5.33447650 | -2.33236090 |
| H | -4.57755620 | -0.76093980 | -2.70997000 |
| H | -0.07387580 | -0.22262850 | 2.06741830  |
| H | -1.41088400 | -4.14785680 | 0.94048150  |
| H | 1.91836090  | -3.70066140 | 3.63192540  |
| H | 1.95200150  | -3.50060510 | -4.17722550 |
